1  
2  
3  
4  
5  
6  
7  
8  
9  
10  
11  
12  
13  
14  
15  
16  
17  
18  
19  
20  
21  
22  
23  
24  
25  
26  
27

## ***De novo* mutations involved in post-transcriptional dysregulation contribute to six neuropsychiatric disorders**

Fengbiao Mao<sup>1,2¶</sup>, Lu Wang<sup>3¶</sup>, Xiaolu Zhao<sup>2¶</sup>, Luoyuan Xiao<sup>4¶</sup>, Xianfeng Li<sup>5</sup>, Qi Liu<sup>6</sup>, Xin He<sup>7</sup>, Rajesh C. Rao<sup>2</sup>, Jinchun Li<sup>1</sup>, Huajing Teng<sup>1\*</sup>, Yali Dou<sup>2\*</sup> and Zhongsheng Sun<sup>1\*</sup>

<sup>1</sup> Beijing Institutes of Life Science, Chinese Academy of Sciences, Beijing 100101, China.

<sup>2</sup> Department of Pathology, University of Michigan, Ann Arbor, MI 48109, USA.

<sup>3</sup> Institute of Life Science, Southeast University, Nanjing 210096, China.

<sup>4</sup> Department of Computer Science and Technology, Tsinghua University, Beijing 100084, China.

<sup>5</sup> State Key Laboratory of Medical Genetics, Central South University, Changsha, Hunan, 410078, China.

<sup>6</sup> Department of Biological Chemistry and Molecular Pharmacology, Harvard Medical School, Boston, MA 02115, USA.

<sup>7</sup> Department of Human Genetics, University of Chicago, Chicago, IL, USA.

¶These authors contributed equally to this work

\* Corresponding authors

E-mail: [sunzs@mail.biols.ac.cn](mailto:sunzs@mail.biols.ac.cn) (Z.S.S.), [yalid@umich.edu](mailto:yalid@umich.edu) (Y.L.D.), [tenghj@biols.ac.cn](mailto:tenghj@biols.ac.cn) (H.J.T.)

## 1 **Abstract**

2 While deleterious *de novo* mutations (DNMs) in coding region conferring risk in  
3 neuropsychiatric disorders have been revealed by next-generation sequencing, the  
4 role of DNMs involved in post-transcriptional regulation in pathogenesis of these  
5 disorders remains to be elucidated. By curating 42,871 DNMs from 9,772 core  
6 families with six kinds of neuropsychiatric disorders and controls, we identified  
7 2,351 post-transcriptionally impaired DNMs (piDNMs) and prioritized 1,923  
8 candidate genes in these six disorders by employing workflow RBP-Var2. Our  
9 results revealed a higher prevalence of piDNM in the probands than that of controls  
10 ( $P = 9.52E-17$ ). Moreover, we identified 214 piDNM-containing genes with  
11 enriched co-expression modules and intensive protein-protein interactions ( $P =$   
12  $7.75E-07$ ) in at least two of neuropsychiatric disorders. Furthermore, these cross-  
13 disorder genes carrying piDNMs could form interaction network centered on RNA  
14 binding proteins, suggesting a shared post-transcriptional etiology underlying these  
15 disorders. Our findings highlight that piDNMs contribute to the pathogenesis of  
16 neuropsychiatric disorders.

17

18

## 1 **Main**

2 In the past decades, there have been increased efforts to better understand the  
3 pathogenesis of psychiatric disorders. Next-generation sequencing, which allows  
4 genome-wide detection of rare and *de novo* mutations (DNMs), is transforming the  
5 pace of genetics of neuropsychiatric disorder by identifying protein-coding  
6 mutations that confer risk. Various computational methods have been developed to  
7 predict the effects of amino acid substitutions on protein function and to classify  
8 corresponding mutations as deleterious or benign. The majority of these approaches  
9 rely on evolutionary conservation or protein structural constraints of amino acid  
10 substitutions and focus on direct changes in protein coding genes, especially from  
11 nonsynonymous mutations which directly affect the gene product<sup>1</sup>. Although  
12 previous studies have analyzed the biological and clinical implications of protein  
13 truncating mutations identified from next-generation sequencing,<sup>2,3</sup> genetic  
14 mutations may not only impact the protein structure or catalytic activity but may also  
15 impact transcriptional processes<sup>4,5</sup> via direct or indirect effects on DNA-protein  
16 binding<sup>6</sup>, histone modifications<sup>7</sup>, enhancer cis-regulation<sup>8</sup> and gene-enhancer  
17 interactions<sup>9</sup>. Meanwhile, genetic mutations could impair post-transcriptional  
18 processes<sup>10,11</sup> such as interactions with RNA binding proteins (RBPs), mRNA  
19 splicing, mRNA transport, mRNA stability and mRNA translation.

20 Hitherto, previous studies of neuropsychiatric disorders have focused on  
21 genetic mutation in coding region<sup>12</sup>, cis-regulation<sup>13,14</sup>, epigenome<sup>15</sup>,  
22 transcriptome<sup>16,17</sup>, and proteome<sup>18</sup>, but less is pursued with regard to how these  
23 disorders interface with post-transcriptional regulation. Therefore, potential  
24 mechanisms of post-transcriptional dysregulation related to pathology and clinical  
25 treatment of neuropsychiatric disorders remain largely uninvestigated. Our previous  
26 method named RBP-Var<sup>19</sup> and a recent published platform called POSTAR<sup>20</sup>

1 represents a seminal effort to systematically annotate post-transcriptional regulatory  
2 maps and explore the putative roles of RBP-mediated SNVs in human diseases.

3 To explore association between extremely post-transcriptionally impaired  
4 DNMs, namely piDNMs, with psychiatric disorders, we collected whole exome and  
5 genome sequencing data from 9,772 core family and curated 42,871 *de novo*  
6 mutations from six kinds of neuropsychiatric disorders, including autism spectrum  
7 disorder (ASD), epileptic encephalopathy (EE), intellectual disability (ID),  
8 schizophrenia (SCZ), brain development defect (DD) and neurodevelopmental  
9 defect (NDD) as well as unaffected controls including siblings. By employing our  
10 newly updated workflow RBP-Var2, we investigated the potential implication of  
11 these *de novo* mutations involved in post-transcriptional regulation in these six  
12 neuropsychiatric disorders and found that a subset of *de novo* mutations could be  
13 classified as piDNMs. We observed a higher prevalence of piDNMs in the probands  
14 of each of all six neuropsychiatric disorders versus controls. In addition, gene  
15 ontology (GO) enrichment analyses of cross-disorder genes containing piDNMs in  
16 at least two of these disorders revealed several shared crucial pathways involved in  
17 the biological processes of neurodevelopment. Meanwhile, weighted gene co-  
18 expression network analysis (WGCNA) and protein-protein interactions analysis  
19 showed enriched co-expression modules and intensive protein-protein interactions  
20 between these cross-disorder genes, respectively, implying that there was convergent  
21 machinery of post-transcriptional regulation among six psychiatric disorders.  
22 Furthermore, we established an interaction network which is centered on several  
23 RBP hubs and encompassed with piDNM-containing genes. In short, DNMs which  
24 are deleterious to post-transcriptional regulation extensively contribute to the  
25 pathogenesis of neuropsychiatric disorders.

## 26 **Results**



1 Our ultimate goal is to identify all piDNMs from DNMs in six neuropsychiatric  
2 disorders by analyzing a variety of aspects related to post-transcriptional regulation  
3 process. To do this, we first developed a comprehensive workflow RBP-Var2 with a  
4 statistic algorithm that links the potentially functional roles in post-transcriptional  
5 regulation to DNMs. We then used this workflow to identify functional variants from  
6 9,772 core families (7,453 cases and 2,319 controls) with 42,871 *de novo* mutations  
7 (29,544 in cases and 13858 in controls, 531 in common) associated with six  
8 neuropsychiatric disorders, including 4,209 families and 25,670 DNMs in autism  
9 spectrum disorder (ASD), 383 families and 492 DNMs in epileptic encephalopathy  
10 (EE), 261 families and 348 DNMs in intellectual disability (ID), 1,077 families and  
11 1,049 DNMs in schizophrenia (SCZ), 1,133 families and 1,531 DNMs in brain  
12 development defect (DD), and 390 families and 454 DNMs in neurodevelopmental  
13 defect (NDD) (Supplementary Table 1). We further presented an online tool  
14 (<http://www.rbp-var.biols.ac.cn/>) that could rapidly annotate and classify piDNMs,  
15 and determine their potential roles in neuropsychiatric disorders.

## 16 **High prevalence of piDNM in six neuropsychiatric disorders**

17 Firstly, we used our updated workflow RBP-Var2 (see methods) to identify  
18 functional piDNMs from 9,772 trios with 42,871 *de novo* mutations (29,041 DNMs  
19 in probands and 13,830 DNMs in controls) across six kinds of neuropsychiatric  
20 disorders as well as their unaffected controls. We determined DNMs with 1/2  
21 categories predicted by RBP-Var2 as piDNMs and identified 2,351 piDNMs in  
22 probands (Supplementary Table 2), of which 64, 18, 2275, 15, 9 were located in 3'  
23 UTRs, 5' UTRs, exons, ncRNA exons and splicing sites, respectively. In detail, RBP-  
24 Var2 identified 1,410 piDNMs in ASD, 356 piDNMs in DD, 281 piDNMs in SCZ,  
25 103 piDNMs in EE, 129 piDNMs in NDD and 102 piDNMs in ID, whileas only 398  
26 piDNMs were identified in controls groups (Supplementary Table 3) of which 20, 4,

1 368, 6 were located in 3' UTRs, 5' UTRs, exons and ncRNA exons, respectively.  
2 Interestingly, the overall frequency of piDNMs in patients in any one of the six  
3 neuropsychiatric disorders were significantly over-represented compared with those  
4 in controls ( $P = 1.07E-16$ , Figure 1A). With the combined data from 9,772 trios, we  
5 also observed that probands groups have much higher odds ratio (OR) of piDNMs  
6 compared with controls in all six kinds of neuropsychiatric disorders (Figure 1B;  
7 Supplementary Table 4). Dramatically, we found that synonymous piDNMs were  
8 significantly enriched in probands in contrast to those in controls ( $P = 9.53E-14$ ).  
9 While in the original DNMs data set before being evaluated by RBP-Var2, the  
10 prevalence of those synonymous DNMs was opposite ( $P = 1.34E-10$ ). To eliminate  
11 the effects of loss-of-function (LoF) mutations derived from protein dysfunction, we  
12 filtered out those with LoF through all piDNMs and found the non-LoF piDNMs  
13 exhibited more significantly higher frequency in probands ( $P = 3.09E-156$ )  
14 (Supplementary Figure 1), indicating that the significant enrichment of those  
15 piDNMs in probands is driven by the contribution of the post-transcriptional effects  
16 rather than those LoF DNMs (Figure 1C). In short, piDNMs that are linked to post-  
17 transcriptional dysregulation may contribute to the pathogenesis of these six  
18 neuropsychiatric disorders.

## 19 **High sensitivity and specificity of piDNMs identified by RBP-** 20 **Var2**

21 Our platform RBP-Var2 determined the post-transcriptional dysfunction of  
22 piDNMs regardless of considering whether the DNMs give rise to protein truncating.  
23 To investigate the accuracy and specificity of DNMs in different regulatory  
24 processes, we compared our RBP-Var2 prediction tool with other three popular tools,  
25 including SIFT<sup>25</sup>, PolyPhen2 (PPH2)<sup>26</sup> and RegulomeDB<sup>21</sup>. RBP-Var2,

1 RegulomeDB and SIFT/PPH2 were designed to evaluate the impact of mutation on  
2 post-transcriptional regulation, transcriptional regulation and protein product,  
3 respectively. We found that the frequency of both deleterious nonsynonymous and  
4 stop gain/loss DNMs is higher in cases than in controls determined by SIFT ( $P =$   
5  $5.37E-62$  and  $P = 4.55E-03$ , respectively), but only higher frequency of deleterious  
6 nonsynonymous DNMs was identified by PPH2 ( $P = 3.68E-102$ ) (Figure 2A, B).  
7 However, RegulomeDB determined significant higher frequency of deleterious  
8 nonsynonymous ( $P = 1.12E-39$ ) and synonymous ( $P = 3.21E-22$ ), nonframeshift ( $P$   
9  $< 2.20E-16$ ), splicing ( $P = 7.62E-04$ ), stop gain/loss ( $P < 2.20E-16$ ) DNMs rather  
10 than frameshift DNMs ( $P = 4.14E-01$ ) (Figure 2C) in cases compared with controls.  
11 In contrast, RBP-Var2 could determine much more deleterious DNMs with the effect  
12 of nonsynonymous ( $P = 6.31E-60$ ) and synonymous ( $P=8.98E-09$ ), splicing ( $P <$   
13  $2.20E-16$ ) and frameshift ( $P = 1.38E-03$ ) (Figure 2D).

14 Our results indicated that both RegulomeDB and RBP-Var2 better distinguish  
15 deleterious DNMs from benign ones compared to SIFT and PPH2 in cases versus  
16 controls. However, the number of deleterious DNMs detected by RegulomeDB is  
17 much less than that of RBP-Var2, suggesting that RegulomeDB has a higher false-  
18 negative rate than RBP-Var2. Therefore, we performed receiver operating  
19 characteristic (ROC) analysis to systemically evaluate the sensitivity and specificity  
20 of these four prediction methods. We found that area under curve (AUC) value of  
21 SIFT, PPH2, RBP-Var2 and RegulomeDB are 78.27 %, 76.57 %, 82.89 % and  
22 50.77 %, respectively (Supplementary Figure 2). Moreover, the AUC value of SIFT,  
23 PPH2, and RBP-Var2 is significantly more sensitive and specific than that of  
24 RegulomeDB with  $P$  value  $1.63E-10$ ,  $2.40E-08$  and  $2.51E-60$ , respectively. In  
25 addition, while the AUC value of RBP-Var2 is significantly higher than that of SIFT  
26 and PPH2 with  $p$  value 0.049 and 0.019, respectively. Consequently, we compared

1 the deleterious DNMs detected by these four methods and found that RBP-Var2  
2 detected more piDNMs that overlapped with predictions of SIFT and PPH2 than that  
3 of RegulomeDB. Intriguingly, RBP-Var2 could detect an additional 1,238 piDNMs  
4 that covered 841 genes and were regarded as benign DNMs by other three methods,  
5 accounting for 24.85% of total 4,981 deleterious DNMs detected by all four tools  
6 (Supplementary Figure 3A, B). The top-enriched gene ontology of these 841 genes  
7 were mitotic cell cycle ( $P = 2.47E-07$ ), mitotic cell cycle process ( $P = 3.85E-06$ ),  
8 cellular response to stress ( $P = 5.63E-06$ ), positive regulation of cell cycle ( $P =$   
9  $7.50E-06$ ) (Supplementary Figure 3D; Supplementary Table 5), suggesting  
10 dysregulation involved in cell cycle and the dysfunction of cellular response may  
11 contribute to diverse neural damage, thereby trigger neurodevelopmental disorders<sup>22</sup>.  
12 Therefore, the piDNMs detected by RBP-Var2 are distinct and may play significant  
13 roles in the post-transcriptional processes of the development of neuropsychiatric  
14 disorders.

## 15 **Shared and distinct features of piDNM across six** 16 **neuropsychiatric disorders**

17 Our previous study using the NPdenovo database demonstrated that *de novo*  
18 mutations predicted as harmful in protein level are shared by four neuropsychiatric  
19 disorders<sup>23</sup>. Therefore, we wondered whether there were common piDNMs among  
20 six neuropsychiatric disorders. Firstly, we identified 24 genes harboring recurrent  
21 piDNMs among 2,351 piDNMs, including nine genes from ASD trios, 10 genes from  
22 DD&NDD trios, six genes from ID trios, and one genes from EE trios (Figure 3A;  
23 Supplementary Table 6). Only two genes harbored cross-disorder recurrent piDNMs.  
24 One was STXBP1 which occurred in both DD and EE, and another was CTNNB1  
25 which occurred in both ASD and DD. However, we identified 312 genes carrying at

1 least two piDNMs in all disorders among each of 1,923 candidate genes (accounting  
2 for 16.22%), including 252 genes involved in ASD, 38 genes involved in EE, 40  
3 genes involved in ID, 68 involved in SCZ trios and 132 genes involved in DD&NDD  
4 (Supplementary Table 7). Among these 312 genes, we identified 35 high risk genes  
5 with  $P$  value  $< 1E-4$  derived from TADA program (Transmission And De novo  
6 Association)<sup>24</sup> (Figure 3B).

7 Subsequently, by comparing the genes harboring piDNMs across six disorders,  
8 we found 214 genes significantly shared by at least two kinds of disorders rather  
9 than random overlaps (permutation test,  $P < 1.00E-5$  based on random resampling,  
10 Figure 3C, D). Furthermore, the genes harboring piDNMs in controls also have  
11 significantly fewer overlaps with the 214 shared genes in the six disorders than  
12 random overlaps ( $P = 0.007$ , Supplementary Figure 4A). In addition, the number  
13 of shared genes for any pairwise comparison is significantly higher than random  
14 overlaps ( $P < 0.05$ ) except for the comparison of EE versus SCZ ( $P = 0.17864$ )  
15 (Supplementary Figure 5). On the contrary, the genes harboring piDNMs in controls  
16 have significantly fewer overlaps with disorders than random overlaps: ASD ( $P <$   
17  $1.00E-5$ , Supplementary Figure 4B), ID ( $P < 1.00E-5$ , Supplementary Figure 4C),  
18 EE ( $P = 1.20E-4$ , Supplementary Figure 4D), SCZ ( $P < 1.00E-5$ , Supplementary  
19 Figure 4E) and DD&NDD ( $P < 1.00E-5$ , Supplementary Figure 4F). Our  
20 observation suggests that there are common genes harboring piDNMs in these six  
21 neuropsychiatric disorders.

22 The shared symptoms in the six neuropsychiatric disorders suggest there is  
23 common underlying molecular mechanism that may implicate important regulators  
24 of pathogenesis. Thus, we performed ClueGO analysis for these shared genes and  
25 found they were mainly enriched in biological processes in epigenetic modification  
26 and neuronal and synaptic functions (Supplementary Table 8). These epigenetic

1 regulating genes are composed of ARID1B, CTCF, CTNNB1, EP300, MECP2,  
2 DNMT3A, KMT2D, MYO1E, CNOT1, TNRC18, JARID2, PHF19, TNRC6A,  
3 DOT1L, KMT2B (Supplementary Table 9). Moreover, most of these epigenetic  
4 modification genes, especially for genes with  $P_{TADA} < 0.05$ , have been previously  
5 linked with neuropsychiatric disorders<sup>25-28</sup>. Interestingly, shared genes in ClueGO  
6 enrichment analyses are intensive linkages among these significant pathways as  
7 some of piDNM-containing genes could play roles in more than one of these  
8 pathways (Supplementary Figure 7).

9 Next, to investigate the biological pathways involved in each disorder-specific  
10 genes containing piDNM, we carried out GO enrichment analysis with terms in  
11 biological process (Supplementary Table 10-12). The most significantly enriched  
12 category of ASD-specific genes was “organelle organization” ( $P = 1.00E-15$ ) and  
13 the second top enriched category in the ASD-specific genes was “cell cycle” ( $P =$   
14  $2.30E-12$ ). We also found that “chromosome organization” ( $P = 3.30E-08$ ),  
15 “regulation of chromosome organization” ( $P = 1.80E-05$ ) and “regulation of  
16 chromatin organization” ( $P = 6.60E-05$ ) are the three most significantly dysregulated  
17 biological pathways of genes unique to DD and NDD. With respect to genes specific  
18 to SCZ, it is actually no surprise that the top three of the enrichment results are  
19 related to autophagy, because autophagy is an essential natural destructive process  
20 and have been suggested to play a key role in the pathophysiology of  
21 schizophrenia<sup>29,30</sup>. Due to the insufficient number of genes, GO enrichment analysis  
22 for genes unique to ID or EE was not performed. As each disorder-specific genes  
23 containing piDNM could be overrepresented into different biological pathway, our  
24 observation suggests that piDNMs may also contribute the distinct phenotype of  
25 each of the six psychiatric disorders although the explicit mechanism need to be  
26 further explored.



## 1 **Convergent co-expression modules across six** 2 **neuropsychiatric disorders**

3 As co-expression of genes has been used to explore the common and distinct  
4 molecular mechanism in neuropsychiatric disorders<sup>31</sup>, we performed weighted gene  
5 co-expression network analysis (WGCNA)<sup>32</sup> with 214 cross-disorder genes  
6 containing piDNMs by using up-to-date BrainSpan developmental transcriptome  
7 (n=524): gene expression in 16 human brain structures across 31 developmental  
8 stages<sup>33</sup>. The results of WGCNA deciphered two gene modules with distinct  
9 spatiotemporal expression patterns (Figure 4A, B; Supplementary Figure 8). The  
10 turquoise module (n=146 genes) is characterized by high expression during early  
11 fetal development (8-37 postconceptional weeks) in most of brain structures (Figure  
12 4C). The blue module (n=58 genes) is delineated to low expression in early fetal  
13 development (postconceptional week 8) and early childhood (3 year) in most of brain  
14 structures (Figure 4D). The turquoise module was enriched for epigenetic regulation  
15 of gene expression (q = 3.99E-08), establishment or maintenance of cell polarity (q  
16 = 8.24E-04), Notch binding (q = 1.33E-3), Thyroid hormone signaling pathway (q  
17 = 1.75E-3), beta-catenin-TCF complex assembly (q = 5.81E-3), chromatin  
18 remodeling (q = 1.30E-2), Notch signaling pathway (q = 2.51E-2), motor activity (q  
19 = 3.21E-2) and other enriched GO terms (Supplementary Figure 9; Supplementary  
20 Table 13). The blue module was enriched visual learning (q = 4.92E-07), regulation  
21 of synaptic plasticity (q = 1.91E-06), actin filament-based movement (q = 6.52E-  
22 06), adult locomotory behavior (q = 3.86E-04), neuromuscular process (q = 8.61E-  
23 04), Long-term depression (q = 1.02E-3), positive regulation of dendrite  
24 development (q = 1.35E-3), negative regulation of autophagy (q = 3.74E-3), negative  
25 regulation of G-protein coupled receptor protein signaling pathway (q = 5.07E-3)

1 and other neurodevelopment related pathways (Supplementary Figure 10;  
2 Supplementary Table 14).

3 In addition, we constructed the co-expression network by using gene pairs with  
4 correlation weight of at least 0.3 (Supplementary Table 15). Out of the 214 cross-  
5 disorder genes containing piDNMs, 206 were clustered in the co-expression  
6 networks (Supplementary Table 16). Interestingly, we found that majority of the co-  
7 expression hubs were histone modifiers, such as KAT6B, KDM5B, SETDB1,  
8 TRRAP, EP300, and transcriptional regulators, including CTCF, SMARCA4,  
9 ARID1B, ADNP, CHAMP1 (Supplementary Figure 11). Consequently, the link  
10 among these six highly heterogeneous neuropsychiatric disorders may be  
11 represented by biological processes controlled by these hub genes in co-expression  
12 networks. Moreover, by employing our newly developed EpiDenovo database<sup>34</sup>, we  
13 found that most of the genes were highly expressed in the early embryonic  
14 development (Supplementary Figure 12), indicating that these genes are crucial in  
15 cell differentiation.

## 16 **Common network of protein-protein interactions across six** 17 **neuropsychiatric disorders**

18 The co-expression results indicated that these 214 piDNM-related cross-  
19 disorder proteins may have intensive protein-protein interactions (PPI). To identify  
20 common biological processes that potentially contribute to disease pathogenesis, we  
21 investigated protein-protein interactions within these 214 cross-disorder genes  
22 containing piDNMs by database BioGRID. Our results revealed that 128 out of 214  
23 (59.81%) cross-disorder genes represent an interconnected network on the level of  
24 available direct/genetic protein-protein interactions (Figure 5A; Supplementary  
25 Table 17). Furthermore, we determined several crucial hubs of protein-protein



1 interactions, including CUL3, CTNNB1, HECW2, HNRNPU, EP300, SMARCA4,  
2 ARRB2, PTPRF, MYH9 and NOTCH1 (Figure 5A), which may control common  
3 biological processes among these six neuropsychiatric disorders. Indeed, these 128  
4 cross-disorder proteins are enriched in nervous system phenotypes, including  
5 abnormal synaptic transmission, abnormal nervous system development, abnormal  
6 neuron morphology and abnormal brain morphology, and behavior/neurological  
7 phenotype such as abnormal motor coordination/balance (two sided Fisher's Exact  
8 Test,  $q < 0.05$ , Supplementary Figure 13A). Similarly, these 128 genes in interaction  
9 network are enriched in nervous system phenotype including abnormal nervous  
10 system development and abnormal brain morphology (two sided Fisher's Exact Test,  
11  $q < 0.05$ , Supplementary Figure 13B). Dramatically, HNRNPU belongs to the  
12 subfamily of ubiquitously expressed heterogeneous nuclear ribonucleoproteins  
13 (hnRNPs) which are RNA binding proteins and they form complexes with  
14 heterogeneous nuclear RNA (hnRNA). These proteins are associated with pre-  
15 mRNAs in the nucleus and appear to influence pre-mRNA processing and other  
16 aspects of mRNA metabolism and transport.

17 By investigating the expression of these co-interacting genes in the human  
18 cortex of 12 ASD patients (accession number GSE64018) and 13 normal donators  
19 (accession number GSE76852) from Gene Expression Omnibus (GEO), we  
20 identified 97 significantly differential expression genes (accounting for 75.78% of  
21 the 128 PPI genes we mentioned above) between ASD patients and normal controls  
22 (Student's t-test,  $q < 0.05$ , Figure 5B). And 86 of these PPI genes were highly  
23 expressed in ASD patients while only 11 genes were down-regulated in ASD patients  
24 when compared with normal controls (Supplementary Table 18), implying that most  
25 of these PPI genes were abnormally expressed in ASD patients.

## 26 **Shared networks between piDNM and RBPs**

1 According to previous studies, dysregulation or mutations of RBPs can cause a  
2 range of developmental and neurological diseases<sup>35,36</sup>. Meanwhile, mutations in  
3 RNA targets of RBPs, which could disturb the interaction between RBPs and their  
4 mRNA targets, would affect mRNA metabolism and protein homeostasis in neurons  
5 by impair RNA transport and translation in neuropathological disorders<sup>37-39</sup>. Indeed,  
6 mutations that alter sequence context of RBP binding sites on target RNA commonly  
7 affect RBP binding and regulation<sup>40</sup>. For instance, regulation depending on FMRP-  
8 related activity during fetal brain development might be particularly vulnerable to  
9 genetic perturbations, with severe mutations resulting in disruption of  
10 developmental canalization<sup>41</sup>. Hence, we constructed a regulatory network between  
11 piDNMs and RBPs based on predicted binding sites of RBPs to investigate the  
12 genetic perturbations of mRNA-RBP interactions in six disorders (Figure 6). We  
13 identified several crucial common RBP hubs that contribute to the pathogenesis of  
14 the six neuropsychiatric disorders, including EIF4A3, FMR1, PTBP1, AGO1/2,  
15 ELAVL1, IGF2BP1/3, WDR33 and FXR2. Genes with piDNMs in different  
16 disorders could be regulated by the same RBP hub while one candidate genes may  
17 be regulated by different RBP hubs (Figure 6). In addition, all of these RBP hubs  
18 were highly expressed in early fetal development stages (8-37 postconceptional  
19 weeks) based on BrainSpan developmental transcriptome (Supplementary Figure  
20 14), suggesting that these RBP hubs may play important roles in the early stages of  
21 brain development.

## 22 **The available data resource**

23 To make our findings easily accessible to the research community, we have  
24 developed RBP-Var2 platform (<http://www.rbp-var.biols.ac.cn/>) for storage and  
25 retrieval of piDNMs, candidate genes, for exploring the genetic etiology of  
26 neuropsychiatric disorders in post-transcriptional regulation. The expression and

1 epigenetic profile of genes related to regulatory *de novo* mutations and early  
2 embryonic development have been deposited in our previously published database  
3 EpiDenovo (<http://www.epidenovo.biols.ac.cn/>)<sup>34</sup>.

## 4 **Discussion**

5 In this study, we systematically analyzed the damaging effect of *de novo*  
6 mutations at the level of post-transcriptional regulation in six neuropsychiatric  
7 disorders. We discovered 2,351 piDNMs in the total of 1,923 genes that displayed  
8 deleterious effect on both post-transcriptional regulation and protein function, of  
9 which 1,034 (43.43%) piDNMs were also determined as extremely deleterious on  
10 the structure and function of protein predicted by NPdenovo, thereby resulting in  
11 identifying the rest of 1,317 piDNMs to have impact on post-transcriptional  
12 regulation only. Among the total 1,923 genes containing piDNMs, 862 (44.83%)  
13 genes were predicted to simultaneously alter the structure and function of  
14 correspondingly coded proteins predicted by NPdenovo. Our observations indicate  
15 that 55.17% of piDNMs are not expected to affect the structure and function of  
16 protein but are predicted to affect post-transcriptional regulation. Moreover,  
17 probands have higher odds ratio of piDNMs than controls in all kinds of  
18 neuropsychiatric disorders. Therefore, piDNMs are one of major contributors to  
19 etiology for neuropsychiatry disorders, which is distinct from the mutation effect on  
20 protein functions.

21 We applied RBP-Var2 algorithm to annotate and interpret *de novo* variants in  
22 subjects with six neuropsychiatric disorders and control subjects. We observed a  
23 strong enrichment of pathogenic or likely pathogenic variants in affected subjects.  
24 In comparison with accuracy of RBP-Var2 (82.89%), other prediction algorithms  
25 such as SIFT or PPH2 have moderate accuracy (76~78%) while RegulomeDB has

1 much lower accuracy (50.77 %) to differentiate affected from the control subjects.  
2 This observation suggests that the potential pathogenicity of genetic variants is  
3 mainly due to post-transcriptional dysregulation and malfunction of protein, but not  
4 disruption of transcription process. Therefore, deciphering multiple biological layers  
5 of deleteriousness, particularly post-transcriptional regulation and structure/function  
6 of protein, may improve the accuracy to predict disease related genetic variations.

7 To date, it has been a challenge to estimate the deleteriousness of synonymous  
8 and UTRs mutations though such mutations have been widely acknowledged to alter  
9 protein expression, conformation and function<sup>42</sup>. Nevertheless, our RBP-Var2 tool  
10 identified 518 synonymous DNMs and 82 UTR's DNMs, which were extremely  
11 deleterious in post-transcriptional regulation. Moreover, synonymous damaging  
12 DNMs were significantly prominent in probands compared with that in controls,  
13 supported by predictions of both RBP-Var2 and RegulomeDB. Meanwhile, *de novo*  
14 insertions and deletions (InDels), especially frameshift patterns are taken for granted  
15 to be deleterious. Indeed, *de novo* frameshift InDels are more frequent in  
16 neuropsychiatric disorders compared to non-frameshift InDels<sup>43</sup>, which were  
17 demonstrated by predictions of RBP-Var2 but not SIFT or PPH2 (Figure 2).

18 Most interestingly, we discovered that some epigenetic pathways are enriched  
19 among these piDNM-containing genes, such as those that regulate gene expression  
20 and histone modification. This finding is consistent with a previous report in which  
21 more than 68% of ASD cases shared a common acetylome aberrations at >5,000 cis-  
22 regulatory regions in prefrontal and temporal cortex<sup>44</sup>. Such common "epimutations"  
23 may be induced by either perturbations of epigenetic regulations (including post-  
24 transcriptional regulations) due to genetic mutations of substrates or the disruptions  
25 of epigenetic modifications due to the genetic mutation of epigenetic genes. Actually,  
26 our observations suggest that alterations of "epimutations" were associated with the

1 dysregulation of post-transcription. This hypothesis is consistent with the observation  
2 that several recurrent piDNM-containing genes are non-epigenetic genes, including  
3 CHD8, CHD2, SYNGAP1, ADNP, POGZ, ANK2 and DYRK1A. Moreover, we also  
4 discovered several recurrent epigenetic genes including KMT2A, KMT2B, KMT2C,  
5 KAT6B, KDM3B, JARID2, DNMT3A and MECP2, that contain piDNMs which  
6 may play important roles in the genome-wide aberrations of epigenetic landscapes  
7 through disruption of the post-transcription regulation. Furthermore, WGCNA  
8 analysis revealed that major hubs of the co-expression network for these 214  
9 piDNM-containing genes were histone modifiers by using BrainSpan developmental  
10 transcriptome. These data indicate that piDNM-containing genes are co-expressed  
11 with genes frequently involved in epigenetic regulation of common cellular and  
12 biological process in neuropsychiatric disorders.

13 Importantly, these 214 piDNM-containing genes harbor intensive protein-  
14 protein interactions in physics and shared regulatory networks between piDNMs and  
15 RBPs in six neuropsychiatric disorders. We identified several RBP hubs of  
16 regulatory networks between piDNM-containing genes and RBP proteins, including  
17 EIF4A3, FMRP, PTBP1, AGO1/2, ELAVL1, IGF2BP1/3, WDR33 and FXR2.  
18 Taking FMRP for example, it is a well-known pathogenic gene of Fragile X  
19 syndrome which co-occurs with autism in many cases and its targets are highly  
20 enriched for *de novo* mutations in ASD<sup>41</sup>. The mutations of any RBP hubs may result  
21 in multiple disorders and mutations of RBP-targeting genes may disrupt interactions  
22 with multiple RBPs. Fortunately, we have constructed the regulatory networks  
23 among multiple RBPs and their target RNAs with *de novo* mutations that could  
24 significantly disturb the regulatory networks in six neuropsychiatric disorders.

25 Alterations in expression or mutations in either RBPs or their binding sites in  
26 target transcripts have been reported to be the cause of several human diseases such

1 as muscular atrophies, neurological disorders and cancer<sup>45</sup>. However, it is still a  
2 challenge to decipher the effect of genetic mutation on post-transcriptional  
3 regulation. In this study, our method sheds light on evaluation of post-transcriptional  
4 impact of genetic mutations especially for synonymous mutations. In addition, as  
5 small molecules can be rapidly designed to selectively target RNAs and affect RNA-  
6 RBP interactions, leading to anti-cancer strategies<sup>46</sup>. Therefore, the discovery of  
7 disease-causing mutations in RNAs is yielding a wealth of new potential therapeutic  
8 targets, providing new RNA-based tools for developing therapeutics.

## 1 **Materials and methods**

### 2 ***Data collection.***

3 For this study, 9,772 trios were recruited from previous WES/WGS studies,  
4 comprising 7,453 parent-probands trios associated with six neuropsychiatric  
5 disorders and 2,319 control trios. After deduplication, a total of 29,041 DNMs in  
6 probands and 13,830 DNMs in controls were identified for subsequent analysis.

### 7 ***RBP-Var2 algorithm***

8 To better interpret and comprise the catalog of *de novo* mutation, we developed  
9 a new heuristic scoring system based on the functional confidence of variants and  
10 mathematical algorithms. The scoring system represents with increasing confidence  
11 that a variant lies in a functional location and probably results in a functional  
12 consequence (i.e. alteration of RBP binding and a gene regulatory effect). For  
13 example, we consider variants that are known eQTLs (expression quantitative trait  
14 locus) as significant and label them as category 1. Within category 1, subcategories  
15 indicate additional annotations ranging from the most informational variants (1a,  
16 variant may change the motif for RBP binding) to the least informational variants  
17 (1e, variant only has a motif for RBP binding). In mathematical algorithms, we  
18 employed LS-GKM<sup>47,48</sup> to predict the impact of DNMs on the binding of specific  
19 RBPs by calculating the delta SVM scores. Moreover, for single-base mutations, we  
20 employed the RNAsnp<sup>49</sup> with default parameters to estimate the mutation effects on  
21 local RNA secondary structure in terms of empirical P-values based on global  
22 folding in correlation measured by using RNAfold<sup>50</sup>. For insertions and deletions,  
23 based on changes of minimal free energy, we evaluated the effects on RNA  
24 secondary structure in terms of empirical P-values calculated from cumulative  
25 probabilities of the Poisson distribution. Only the functional DNM produces >1



1 change in gkm-SVM scores for the effect of RBP binding or  $P$ -value  $< 0.1$  for the  
2 effect of RNA secondary structure change were determined to be a piDNM. Only  
3 DNMs occurred in exonic or UTR regions were included in our analysis process.

#### 4 ***Identification of deleterious piDNMs and comparison with variants*** 5 ***predicted by other methods.***

6 To determine the likelihood of causing a deleterious mutation in post-  
7 transcriptional regulation for all SNVs and InDels, our newly updated program RBP-  
8 Var2 was utilized to assign an exclusive rank for each mutation and only those  
9 mutations categorized into rank 1 or 2 were considered as piDNMs. In comparison  
10 with those mutations involved in the disruption of gene function or transcriptional  
11 regulation, several programs such as SIFT, PolyPhen2 and RegulomeDB were used  
12 to analyze the same dataset of DNMs as the input for RBP-Var2. We only kept the  
13 mutations qualified as “damaging” from the result of SIFT and “possibly damaging”  
14 or “probably damaging” from PolyPhen2. In the case of RegulomeDB, mutations  
15 labeled as category 1 and 2 were retained. Next, we classified the type of mutation  
16 (frameshift, nonframeshift, nonsynonymous, synonymous, splicing and stop) and  
17 located regions (UTR3, UTR5, exonic, ncRNA exonic and splicing) in order to  
18 determine distribution of piDNMs, genetic variants and other regulatory variants.  
19 The number of variants in cases versus controls was illustrated by bar chart (\*\*\*:  $P$   
20  $< 0.001$ , \*\*:  $0.001 < P < 0.01$ , \*:  $0.01 < P < 0.05$ , binomial test).

#### 21 ***TADA analysis of DNMs in six disorders***

22 The TADA program (Transmission And De novo Association), which predicts  
23 risk genes accurately on the basis of allele frequencies, gene-specific penetrance,  
24 and mutation rate, was used to calculate the  $P$ -value for the likelihood of each gene  
25 contributing to the all six disorders with default parameters.



## 1 ***ROC curves and specificity/sensitivity estimation***

2 We screened a positive (non-neutral) test set of likely casual mutations in  
3 Mendelian disease from the ClinVar database (v20170130). From a total of 237,308  
4 mutations in ClinVar database, we picked up 145 exonic mutations presenting in our  
5 curated DNMs in probands. Our negative (neutral) set of likely non-casual variants  
6 was built from DNMs of unaffected siblings in six neuropsychiatric disorders. In  
7 order to avoid rare deleterious DNMs, we selected only DNMs in controls with a  
8 minor allele frequency of at least 0.01 in 1000 genome (1000g2014oct), resulting in  
9 a set of 921 exonic variants. Then, we employed R package pROC to analyze and  
10 compare ROC curves.

## 11 ***Overlaps of piDNMs between disorders.***

12 In order to elucidate the overlap of genes among any two of the six disorders as  
13 well as each disorder and the control, we shuffled the intersections of genes and  
14 repeated this procedure 100,000 times. During each permutation, we randomly  
15 selected the same number of genes as the actual situation from the entire genome for  
16 each disorder and the control, then  $p$  values were calculated as the proportion of  
17 permutations during which the observed number of genes was above/below the  
18 number of genes in simulated situations.

## 19 ***Functional enrichment analysis***

20 A gene harboring piDNMs would be selected into our candidate gene set to  
21 conduct functional enrichment analysis if it occurred in at least two of the six  
22 disorders. GO (Gene Ontology) and KEGG (Kyoto Encyclopedia of Genes and  
23 Genomes) pathway enrichments analysis was implemented by Cytoscape (version  
24 3.4.0) plugin ClueGO (version 2.3.0) and  $P$  values calculated by hypergeometric test  
25 was corrected to be  $q$  values by Benjamini–Hochberg procedure for reducing the  
26 false discovery rate resulted from multiple hypothesis testing.

## 1 ***Co-expression and spatiotemporal specificity***

2 Normalized gene-expression of 16 human brain regions were determined by  
3 RNA sequencing and obtained from BrainSpan (<http://www.brainspan.org>). We  
4 extracted expression for 206 out of 214 extreme damaging cross-disorder genes and  
5 employed R-package WGCNA (weighted correlation network analysis) with a  
6 power of five to cluster the spatiotemporal-expression patterns and prenatal laminar-  
7 expression profiles. The expression level for each gene and development stage (only  
8 stages with expression data for all 16 structures were selected,  $n = 14$ ) was presented  
9 across all brain regions.

## 10 ***Protein-protein interaction and phenotype enrichment***

11 Cross-disorder genes containing piDNMs were subjected to esyN analysis for  
12 generating a network of protein interactions and the network of protein interaction  
13 was created by using physical and genetic interactions of *H. sapiens* curated in  
14 BioGRID. Cytoscape (version 3.4.0) was used to analyze and visualize protein-  
15 protein interaction networks. Overrepresentation of mouse-mutant phenotypes was  
16 evaluated using the web tool MamPhea for the genes in the PPI network and for all  
17 cross-disorder genes containing piDNMs. Rest of genome was used as background  
18 and  $q$  values were calculated from  $P$  values by Benjamini-Hochberg correction.

## 19 ***Gene-RBP interaction network***

20 Cytoscape (version 3.4.0) was utilized for visualization of the associations  
21 between genes harboring piDNMs in the six neuropsychiatric disorders and the  
22 corresponding regulatory RBPs.

## 23 ***URLs***

1 RBP-Var2, <http://www.rbp-var.biols.ac.cn/> ; NPdenovo,  
2 <http://www.wzgenomics.cn/NPdenovo/index.php>;  
3 <http://www.epidenovo.biols.ac.cn/>; BioGRID, <https://thebiogrid.org/>;  
4 MamPhea , <http://evol.nhri.org.tw/phenome/index.jsp?platform=mmus>; BrainSpan,  
5 <http://www.brainspan.org>; ClinVar, <https://www.ncbi.nlm.nih.gov/clinvar/>;  
6 1000Genomes, <http://www.internationalgenome.org/>; WGCNA,  
7 <https://labs.genetics.ucla.edu/horvath/CoexpressionNetwork/Rpackages/WGCNA/>;  
8 esyN, <http://www.esyn.org/>; Cytoscape, <http://www.cytoscape.org/>; TADA,  
9 [http://wpicr.wpic.pitt.edu/WPICCompGen/TADA/TADA\\_homepage.htm](http://wpicr.wpic.pitt.edu/WPICCompGen/TADA/TADA_homepage.htm); ClueGO,  
10 <http://apps.cytoscape.org/apps/cluego>; pROC, <http://web.expasy.org/pROC/>; R,  
11 <https://www.r-project.org/>; Perl, <https://www.perl.org/>.

## 12 **Contributions**

13 F.M. and L.W. participated in the design and execution of analyses, produced the  
14 figures, participated in the interpretation of results and edited the manuscript. F.M.  
15 developed computational code employed in the analyses. L.W. developed the  
16 statistical framework and drew the figures. X.Z. participated in the interpretation of  
17 results, the oversight of analyses. L.X., X. L. and Q.L. developed and improved the  
18 online platform of RBP-Var2. X.H., H.J.T. and R.C.R. provided professional  
19 guidance in the writing and refining of the manuscript. J.L. and H.J.T. collected the  
20 DNMs from literature and database. Z.S.S. and Y.L.D. conceived the study,  
21 participated in the design of analyses, oversaw the study and the interpretation of  
22 results, and drafted and edited the manuscript. All authors reviewed and edited the  
23 final manuscript.

## 24 **Acknowledgments**

1 The project was funded by National Key R&D Program of China (No.  
2 2016YFC0900400). We thank Kun Zhang for his help in TADA analysis and thank  
3 Leisheng Shi for his help in data analysis. It is greatly appreciated for the  
4 professional suggestions from Professor Weixiang Guo in the Institute of Genetics  
5 and Developmental Biology, Chinese Academy of Sciences.

## 6 **Competing interests**

7 The authors declare no competing financial interests.

## 8 **Figure legends**

9 **Figure 1.** The abundance of DNMs in different RBP-Var2 categories. (A) The  
10 quantities of DNMs in patients with neuropsychiatric disorders are significantly  
11 larger than that in normal controls, shown in several categories classified by RBP-  
12 Var2. (B) The bar plot corresponds to the odds ratios indicating the enrichment of  
13 piDNMs in patients from each of the five neuropsychiatric disorders. (C) The  
14 relative amount of LoF and non-LoF piDNMs in five neuropsychiatric disorders.

15 **Figure 2.** Performance comparison of the ability to distinguish severe DNMs  
16 between RBP-Var2 and three other tools. (A) Different kinds of DNMs affecting  
17 protein function predicted by SIFT. The Y-axis corresponds to the proportion of each  
18 kind of mutations within the total number of damaging DNMs predicted by SIFT.  
19 (B) Different kinds of DNMs that affect protein function predicted by PolyPhen2.  
20 The Y-axis corresponds to the proportion of each kind of mutations within the total  
21 number of damaging DNMs predicted by PolyPhen2. (C) The DNMs predicted as  
22 functional elements involved in transcriptional regulation by RegulomeDB are  
23 categorized into different functional types. The Y-axis corresponds to the proportion  
24 of each kind of mutations within the total number of damaging DNMs predicted by

1 RegulomeDB. (D) The DNMs classified as either level 1 or 2 (piDNMs) are  
2 categorized into different functional types. The Y-axis corresponds to the proportion  
3 of each kind of mutations within the total number of damaging piDNMs. The P  
4 values were measured by two-sided binomial test. DNMs predicted in both cases and  
5 controls are excluded in the comparison and the DNMs labeled as “unknown” are  
6 not demonstrated in the bar plot.

7 **Figure 3.** Candidate genes selected by RBP-Var2 involved in six neuropsychiatric  
8 disorders. (A) Scatter plot of 24 genes harboring recurrent piDNMs among 2,351  
9 piDNMs. The Y-axis corresponds to the  $-\log_{10}(\text{P value})$  calculated by TADA. The  
10 X-axis stands for the TADA output of  $-\log_{10}(\text{mutation rate})$ . (B) Scatter plot of 312  
11 recurrent genes among 1,923 candidate genes. The Y-axis corresponds to the  $-\log_{10}(\text{P value})$  calculated by TADA. The X-axis stands for the TADA output of  $-\log_{10}(\text{mutation rate})$ . (C) Venn diagram representing the distribution of candidate genes shared among five neuropsychiatric disorders. (D) Permutation test for the validity of the overlap between the candidate genes involved in the five neuropsychiatric disorders. We shuffled the genes of each disorder and calculated the shared genes between the five disorders, repeating this procedure for 100,000 times to get the null distribution. The vertical dash line stands for the observed value corresponding to a P value of the permutation test.

20 **Figure 4.** Weighted co-expression analysis of 214 shared genes. (A) Heat map  
21 visualization of the co-expression network of 214 shared genes. The more saturated  
22 color corresponds to the highly expressed genes. (B) Hierarchical clustering  
23 dendrogram of the two color-coded gene modules displayed in (A). (C, D) The two  
24 spatiotemporal expression patterns (Turquoise module and Blue module) for  
25 network genes based on RNA-seq data from BrainSpan, and corresponding to 17  
26 developmental stages across 16 subregions. (E, F) Characterization of neocortical

1 expression profiles (Turquoise module and Blue module) for 214 piDNM-related  
2 genes. Four subregions of the developing neocortex, delineating nine layers per  
3 subregion, were analyzed. A1C, primary auditory cortex; AMY, amygdaloid  
4 complex; CPo, outer cortical plate; CPi, inner cortical plate; DFC, dorsolateral  
5 prefrontal cortex; HIP, hippocampus; IPC, posteroinferior parietal cortex; ITC,  
6 inferolateral temporal cortex; M1C, primary motor cortex; MD, mediodorsal nucleus  
7 of thalamus; MFC, anterior cingulate cortex; MZ, marginal zone; OFC, orbital  
8 frontal cortex; STC, posterior superior temporal cortex; SG, subpial granular zone;  
9 SP, subplate zone; IZ, subplate zone; STR, striatum; SZo, outer subventricular zone;  
10 SZi, inner subventricular zone; S1C, primary somatosensory cortex; V1C, primary  
11 visual cortex; VFC, ventrolateral prefrontal cortex; VZ, ventricular zone.

12 **Figure 5.** Protein-protein interaction network analysis. (A) The network of  
13 interactions between pairs of proteins of 128 out 214 shared genes. (B) Heat map  
14 showing significantly differential expression of 97 out of 128 genes involved in the  
15 protein-protein interaction network.

16 **Figure 6.** Interaction network of RBPs and genes with piDNMs. Different roles of  
17 the nodes are reflected by distinguishable geometric shapes and colors. The magenta  
18 vertical arrow stands for the RNA binding proteins. Disks with different colors  
19 represent the genes with piDNMs involved in different kinds of disorders.

20 **Supplementary Figure 1.** Excess of piDNMs in probands. The distinction of  
21 synonymous mutations and mutations in UTRs were analyzed in DNMs and  
22 piDNMs between probands and healthy controls. Overall moderate piDNMs and  
23 piDNMs (LoF mutations not included) were also displayed. P values were calculated  
24 assuming a binomial distribution.

1 **Supplementary Figure 2.** ROC curve showing the performance of the predictions  
2 of SIFT, PPH2, RBP-Var2 and RegulomeDB.

3 **Supplementary Figure 3.** Overlap of DNMs identified by different tools. (A) Venn  
4 diagram depicting the overlap between the DNMs predicted by SIFT, PPH2, RBP-  
5 Var2 and RegulomeDB. (B) Venn diagram depicting the overlap between the genes  
6 predicted by SIFT, PPH2, RBP-Var2 and RegulomeDB. (C) The pie chart shows the  
7 distribution of all non-LoF piDNMs. The non-LoF piDNMs detected by RBP-Var2  
8 alone account for 52% in this distribution (light red), while the non-LoF piDNMs  
9 identified by SIFT and Polyphen2 both take up 27.6% of all (dark moderate blue).  
10 (D) Pathway enrichment analysis of the 841 genes unique to the prediction of RBP-  
11 Var2.

12 **Supplementary Figure 4.** Test of the significance of the genes shared between each  
13 pair of the five disorders. (A-G) Permutation test for the validity of the gene overlap  
14 between each pair of the five disorders. We shuffled the genes of each disorder and  
15 calculated the shared genes between each pair, repeating this procedure for 100,000  
16 times to get the null distribution. The vertical dash line stands for the observed value  
17 corresponding to a P value of the permutation test.

18 **Supplementary Figure 5.** Test of the significance of the 214 candidate genes  
19 involved in the five neuropsychiatric disorders. (A-E) Permutation test for the  
20 validity of the gene overlap between each disorder and the normal control. (F)  
21 Permutation test for the validity of the gene overlap between the 214 shared genes  
22 and the normal control.

23 **Supplementary Figure 6.** Pie chart of the pathway enrichment analysis for the 214  
24 shared genes.



1 **Supplementary Figure 7.** Interaction network of the gene enrichment analysis for  
2 the 214 shared genes.

3 **Supplementary Figure 8.** Relationship between Co-expression modules. (A) MDS  
4 plot of genes in turquoise module and blue module. (B) Relationship between  
5 module eigengenes. (C) Clustering tree based of the module eigengenes. (D)  
6 heatmap of adjacency Eigengene.

7 **Supplementary Figure 9.** The two developmental expression patterns (Turquoise  
8 module and Blue module) for network genes based on RNA-seq data from  
9 EpiDenovo.

10 **Supplementary Figure 10.** The co-expression network of 206 out of the 214 shared  
11 genes. Different size of the node is representative of the number of connections  
12 between the gene and others.

13 **Supplementary Figure 11.** Pie chart showing the enrichment analysis of the genes  
14 clustered in the turquoise module from the weighted co-expression analysis.

15 **Supplementary Figure 12.** Pie chart showing the enrichment analysis of the genes  
16 clustered in the blue module from the weighted co-expression analysis.

17 **Supplementary Figure 13.** Mammalian phenotype enrichment analysis of selected  
18 genes. (A) Mammalian phenotype enrichment of 214 cross-disorder piDNMs genes.  
19 (B) Mammalian phenotype enrichment of 128 genes in interaction network.

20 **Supplementary Figure 14.** Heat map of the expression of the crucial RBP hub genes  
21 during the early fetal development stages.

22



## 1 Reference

- 2 1. Gnad, F., Baucom, A., Mukhyala, K., Manning, G. & Zhang, Z.M. Assessment of computational  
3 methods for predicting the effects of missense mutations in human cancers. *Bmc Genomics*  
4 **14**(2013).
- 5 2. Sullivan, P.F., Daly, M.J. & O'Donovan, M. DISEASE MECHANISMS Genetic architectures of  
6 psychiatric disorders: the emerging picture and its implications. *Nature Reviews Genetics* **13**,  
7 537-551 (2012).
- 8 3. Heinzen, E.L., Neale, B.M., Traynelis, S.F., Allen, A.S. & Goldstein, D.B. The Genetics of  
9 Neuropsychiatric Diseases: Looking In and Beyond the Exome. *Annual Review of Neuroscience*,  
10 *Vol 38* **38**, 47-68 (2015).
- 11 4. Chen, X.F., Zhang, Y.W., Xu, H.X. & Bu, G.J. Transcriptional regulation and its misregulation in  
12 Alzheimer's disease. *Molecular Brain* **6**(2013).
- 13 5. Lee, T.I. & Young, R.A. Transcriptional Regulation and Its Misregulation in Disease. *Cell* **152**, 1237-  
14 1251 (2013).
- 15 6. Mathelier, A. *et al.* Cis-regulatory somatic mutations and gene-expression alteration in B-cell  
16 lymphomas. *Genome Biology* **16**(2015).
- 17 7. Portela, A. & Esteller, M. Epigenetic modifications and human disease. *Nature Biotechnology* **28**,  
18 1057-1068 (2010).
- 19 8. Sakabe, N.J., Savic, D. & Nobrega, M.A. Transcriptional enhancers in development and disease.  
20 *Genome Biology* **13**(2012).
- 21 9. Lupianez, D.G. *et al.* Disruptions of Topological Chromatin Domains Cause Pathogenic Rewiring of  
22 Gene-Enhancer Interactions. *Cell* **161**, 1012-1025 (2015).
- 23 10. Linder, B., Fischer, U. & Gehring, N.H. mRNA metabolism and neuronal disease. *Febs Letters* **589**,  
24 1598-1606 (2015).
- 25 11. Halbeisen, R.E., Galgano, A., Scherrer, T. & Gerber, A.P. Post-transcriptional gene regulation: From  
26 genome-wide studies to principles. *Cellular and Molecular Life Sciences* **65**, 798-813 (2008).
- 27 12. Iossifov, I. *et al.* The contribution of de novo coding mutations to autism spectrum disorder.  
28 *Nature* **515**, 216-21 (2014).
- 29 13. Gamazon, E.R. *et al.* Enrichment of cis-regulatory gene expression SNPs and methylation  
30 quantitative trait loci among bipolar disorder susceptibility variants. *Molecular Psychiatry* **18**,  
31 340-346 (2013).
- 32 14. Bonder, M.J. *et al.* Disease variants alter transcription factor levels and methylation of their  
33 binding sites. *Nat Genet* (2016).
- 34 15. Loke, Y.J., Hannan, A.J. & Craig, J.M. The Role of Epigenetic Change in Autism Spectrum  
35 Disorders. *Front Neurol* **6**, 107 (2015).
- 36 16. Gupta, S. *et al.* Transcriptome analysis reveals dysregulation of innate immune response genes  
37 and neuronal activity-dependent genes in autism. *Nat Commun* **5**, 5748 (2014).
- 38 17. Voineagu, I. *et al.* Transcriptomic analysis of autistic brain reveals convergent molecular  
39 pathology. *Nature* **474**, 380-4 (2011).
- 40 18. Corbett, B.A. *et al.* A proteomic study of serum from children with autism showing differential  
41 expression of apolipoproteins and complement proteins. *Mol Psychiatry* **12**, 292-306 (2007).
- 42 19. Mao, F.B. *et al.* RBP-Var: a database of functional variants involved in regulation mediated by  
43 RNA-binding proteins. *Nucleic Acids Research* **44**, D154-D163 (2016).
- 44 20. Hu, B., Yang, Y.-C.T., Huang, Y., Zhu, Y. & Lu, Z.J. POSTAR: a platform for exploring post-  
45 transcriptional regulation coordinated by RNA-binding proteins. *Nucleic Acids Research*, gkw888  
46 (2016).

- 1 21. Boyle, A.P. *et al.* Annotation of functional variation in personal genomes using RegulomeDB.  
2 *Genome Research* **22**, 1790-1797 (2012).
- 3 22. Wang, W. *et al.* Neural cell cycle dysregulation and central nervous system diseases. *Prog*  
4 *Neurobiol* **89**, 1-17 (2009).
- 5 23. Li, J.C. *et al.* Genes with de novo mutations are shared by four neuropsychiatric disorders  
6 discovered from NPdenovo database. *Molecular Psychiatry* **21**, 290-297 (2016).
- 7 24. He, X. *et al.* Integrated Model of De Novo and Inherited Genetic Variants Yields Greater Power to  
8 Identify Risk Genes. *Plos Genetics* **9**(2013).
- 9 25. Hsieh, J. & Eisch, A.J. Epigenetics, hippocampal neurogenesis, and neuropsychiatric disorders:  
10 Unraveling the genome to understand the mind. *Neurobiology of Disease* **39**, 73-84 (2010).
- 11 26. Brookes, E. & Shi, Y. Diverse Epigenetic Mechanisms of Human Disease. *Annual Review of*  
12 *Genetics*, Vol 48 **48**, 237-268 (2014).
- 13 27. Jakovcevski, M. & Akbarian, S. Epigenetic mechanisms in neurological disease. *Nature Medicine*  
14 **18**, 1194-1204 (2012).
- 15 28. Peter, C.J. & Akbarian, S. Balancing histone methylation activities in psychiatric disorders. *Trends*  
16 *in Molecular Medicine* **17**, 372-379 (2011).
- 17 29. Merenlender-Wagner, A. *et al.* Autophagy has a key role in the pathophysiology of schizophrenia.  
18 *Mol Psychiatry* **20**, 126-32 (2015).
- 19 30. Merenlender-Wagner, A. *et al.* New horizons in schizophrenia treatment: autophagy protection  
20 is coupled with behavioral improvements in a mouse model of schizophrenia. *Autophagy* **10**,  
21 2324-32 (2014).
- 22 31. Lotan, A. *et al.* Neuroinformatic analyses of common and distinct genetic components associated  
23 with major neuropsychiatric disorders. *Frontiers in Neuroscience* **8**(2014).
- 24 32. Langfelder, P. & Horvath, S. WGCNA: an R package for weighted correlation network analysis.  
25 *Bmc Bioinformatics* **9**(2008).
- 26 33. Kang, H.J. *et al.* Spatio-temporal transcriptome of the human brain. *Nature* **478**, 483-9 (2011).
- 27 34. Mao, F. *et al.* EpiDenovo: a platform for linking regulatory de novo mutations to developmental  
28 epigenetics and diseases. *Nucleic Acids Res* (2017).
- 29 35. Castello, A., Fischer, B., Hentze, M.W. & Preiss, T. RNA-binding proteins in Mendelian disease.  
30 *Trends in Genetics* **29**, 318-327 (2013).
- 31 36. Klein, M.E., Monday, H. & Jordan, B.A. Proteostasis and RNA Binding Proteins in Synaptic  
32 Plasticity and in the Pathogenesis of Neuropsychiatric Disorders. *Neural Plasticity* (2016).
- 33 37. Lukong, K.E., Chang, K.W., Khandjian, E.W. & Richard, S. RNA-binding proteins in human genetic  
34 disease. *Trends in Genetics* **24**, 416-425 (2008).
- 35 38. Gerstberger, S., Hafner, M. & Tuschl, T. A census of human RNA-binding proteins. *Nature Reviews*  
36 *Genetics* **15**, 829-845 (2014).
- 37 39. Neelamraju, Y., Hashemikhabir, S. & Janga, S.C. The human RBPome: From genes and proteins to  
38 human disease. *Journal of Proteomics* **127**, 61-70 (2015).
- 39 40. Taliaferro, J.M. *et al.* RNA Sequence Context Effects Measured In Vitro Predict In Vivo Protein  
40 Binding and Regulation. *Molecular Cell* **64**, 294-306 (2016).
- 41 41. Parikshak, N.N., Gandal, M.J. & Geschwind, D.H. Systems biology and gene networks in  
42 neurodevelopmental and neurodegenerative disorders. *Nature Reviews Genetics* **16**, 441-458  
43 (2015).
- 44 42. Sauna, Z.E. & Kimchi-Sarfaty, C. Understanding the contribution of synonymous mutations to  
45 human disease. *Nature Reviews Genetics* **12**, 683-691 (2011).
- 46 43. Kosmicki, J.A. *et al.* Refining the role of de novo protein-truncating variants in  
47 neurodevelopmental disorders by using population reference samples. *Nat Genet* (2017).

- 1 44. Sun, W. *et al.* Histone Acetylome-wide Association Study of Autism Spectrum Disorder. *Cell* **167**,  
2 1385-1397 e11 (2016).  
3 45. Kechavarzi, B. & Janga, S.C. Dissecting the expression landscape of RNA-binding proteins in  
4 human cancers. *Genome Biology* **15**(2014).  
5 46. Costales, M.G. *et al.* Small Molecule Inhibition of microRNA-210 Reprograms an Oncogenic  
6 Hypoxic Circuit. *J Am Chem Soc* **139**, 3446-3455 (2017).  
7 47. Lee, D. LS-GKM: a new gkm-SVM for large-scale datasets. *Bioinformatics* **32**, 2196-2198 (2016).  
8 48. Lee, D. *et al.* A method to predict the impact of regulatory variants from DNA sequence. *Nature*  
9 *Genetics* **47**, 955+ (2015).  
10 49. Sabarinathan, R. *et al.* RNAsnp: Efficient Detection of Local RNA Secondary Structure Changes  
11 Induced by SNPs (vol 34, pg 546, 2013). *Human Mutation* **34**, 925-925 (2013).  
12 50. Gruber, A.R., Lorenz, R., Bernhart, S.H., Neubock, R. & Hofacker, I.L. The Vienna RNA Websuite.  
13 *Nucleic Acids Research* **36**, W70-W74 (2008).

14

**A**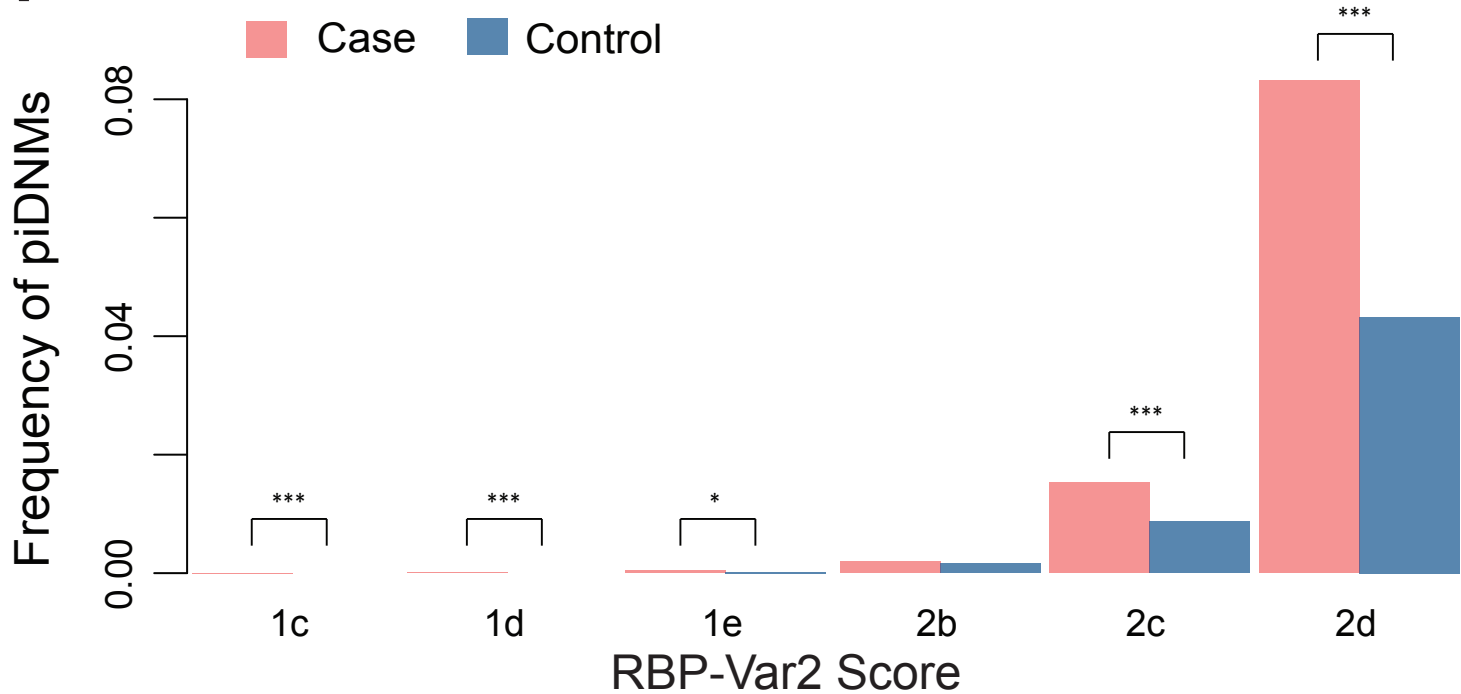**B**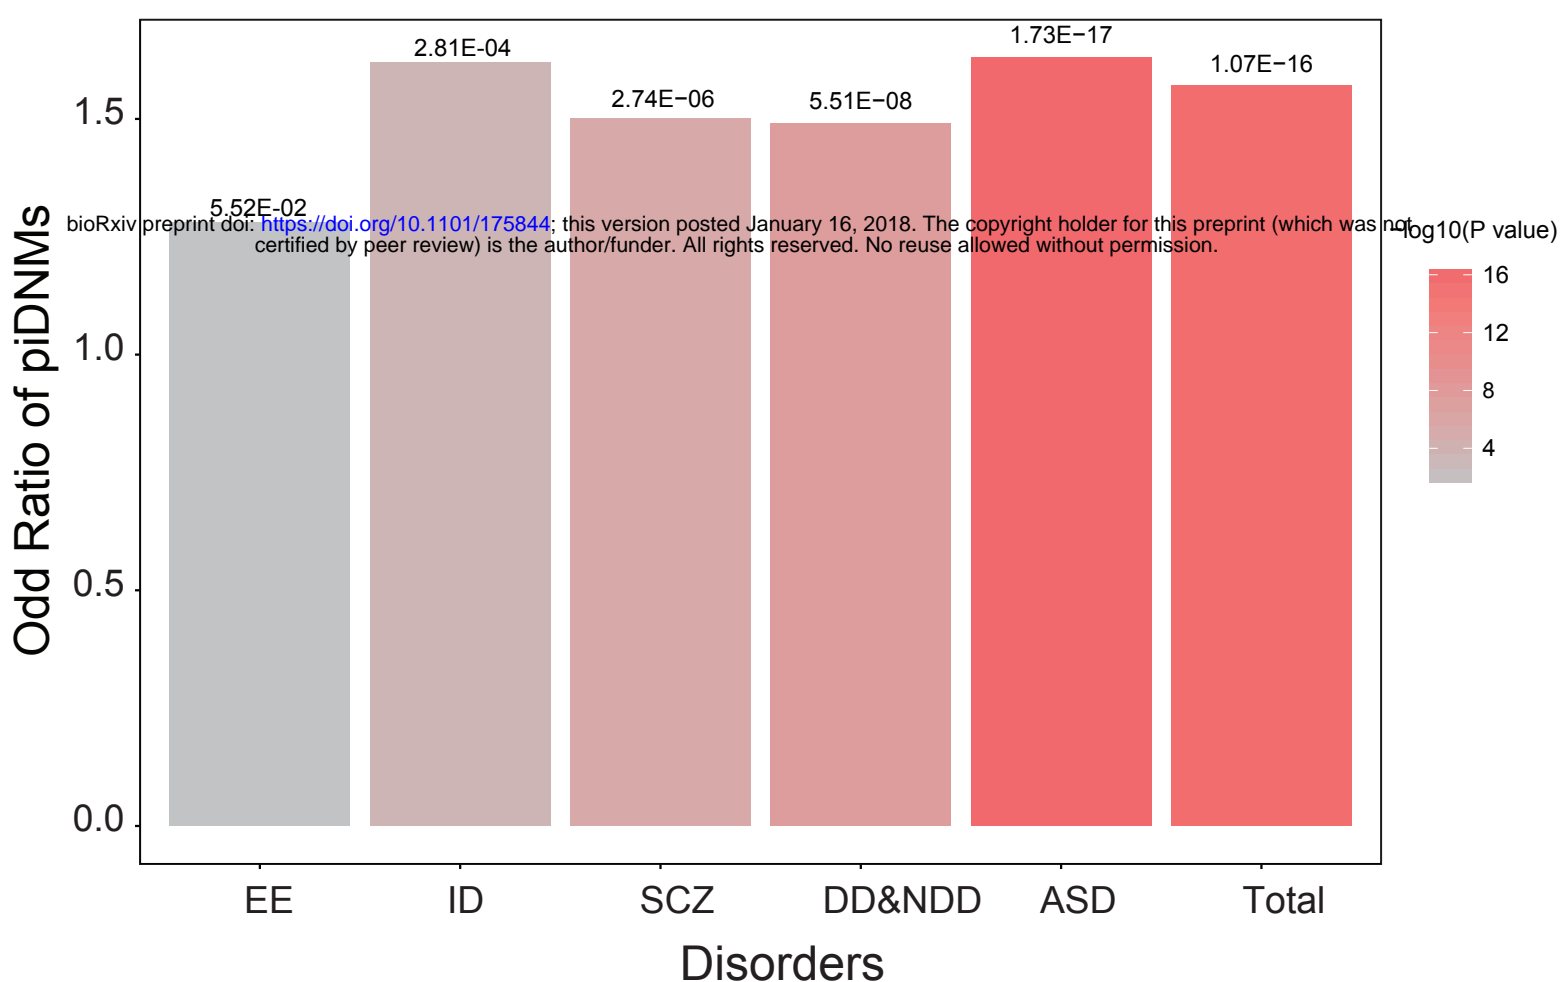**C**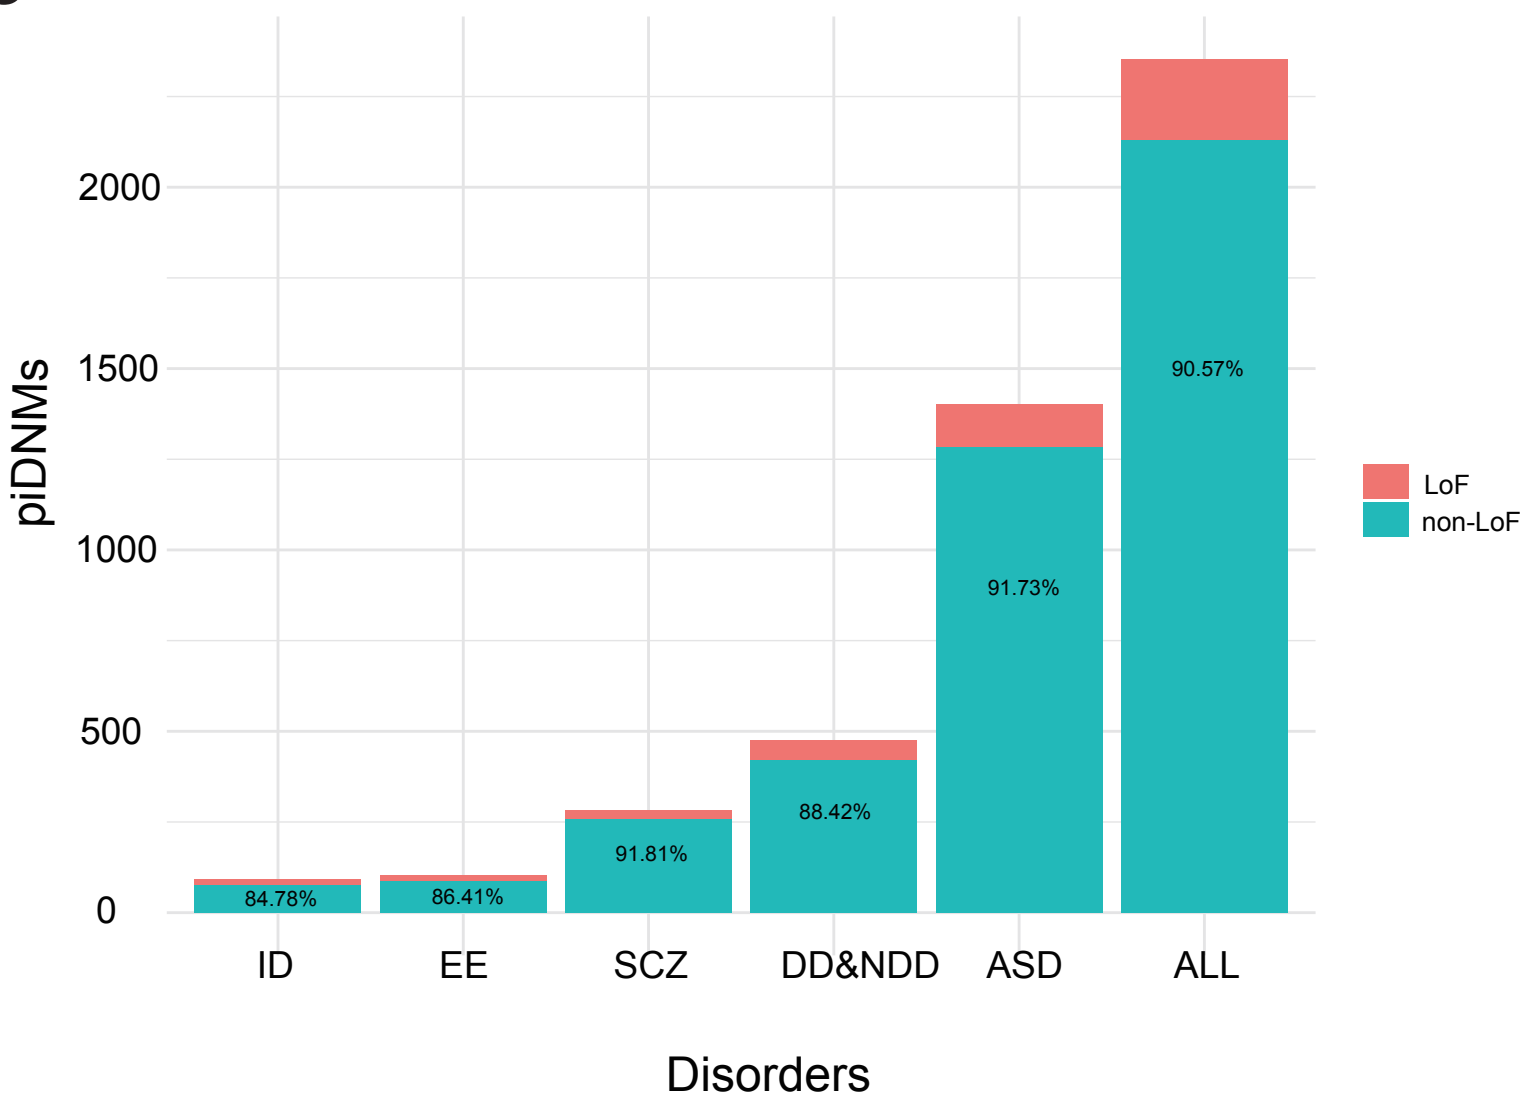

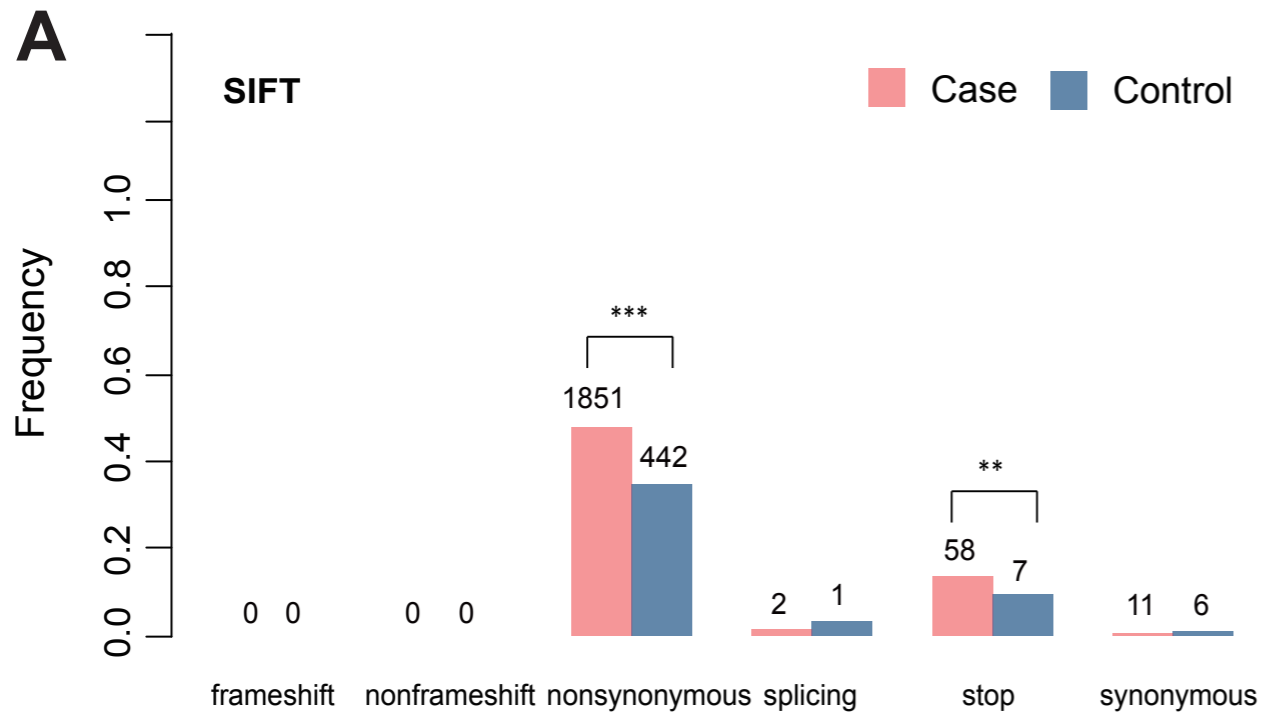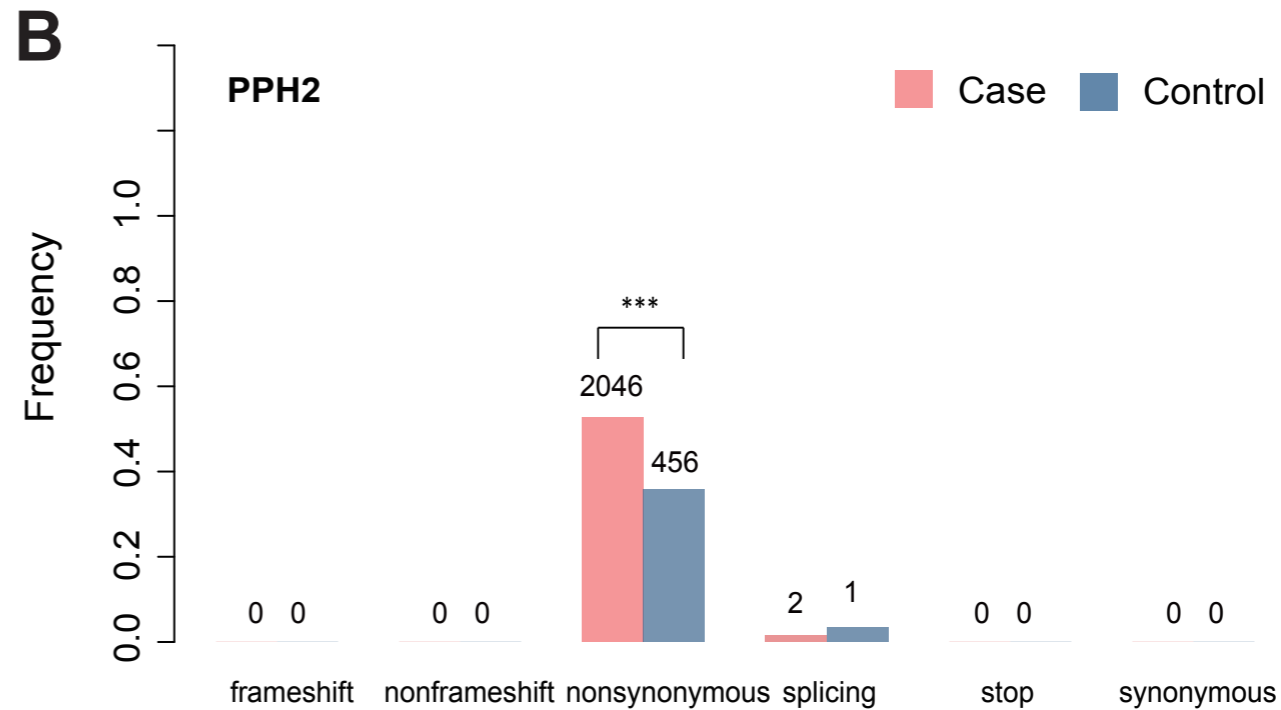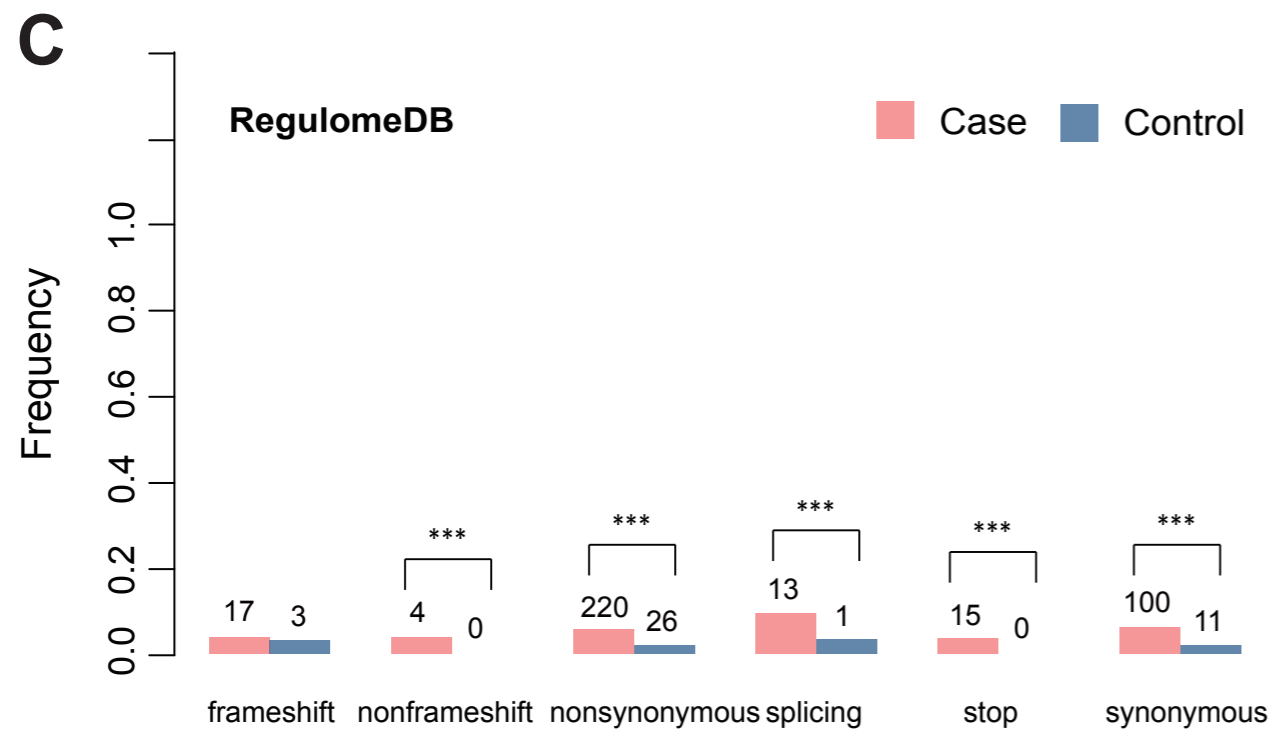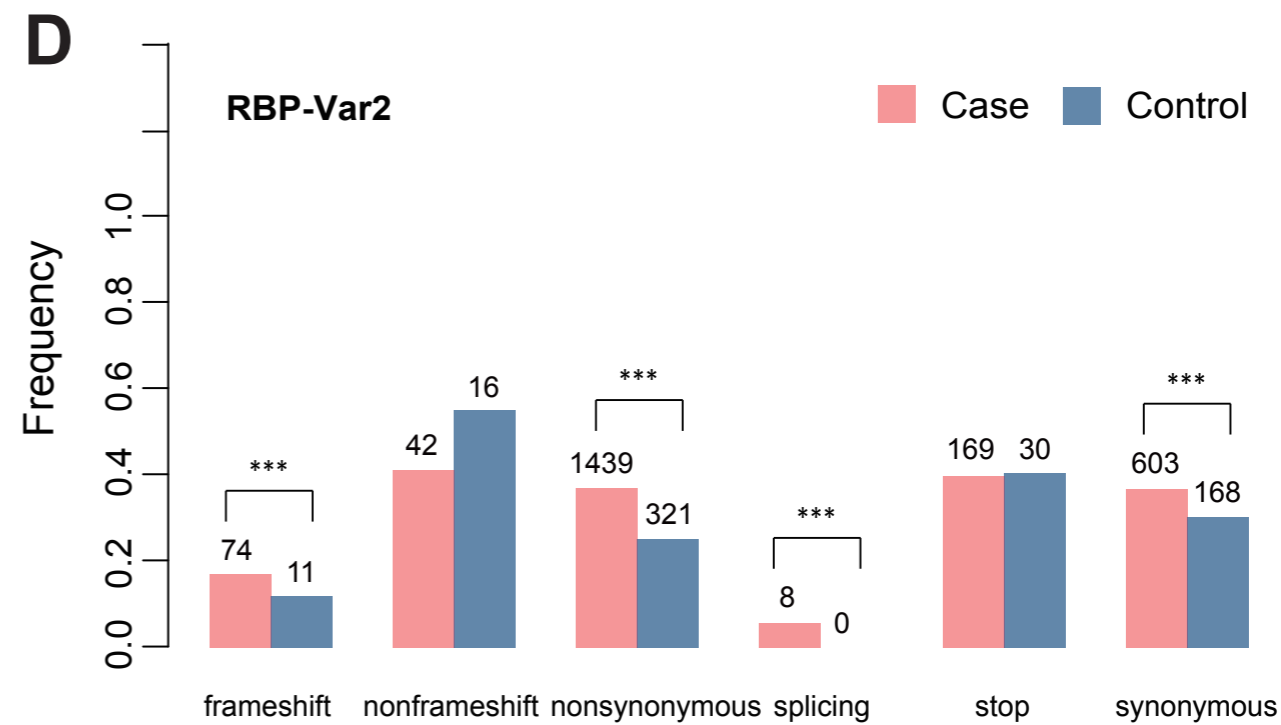

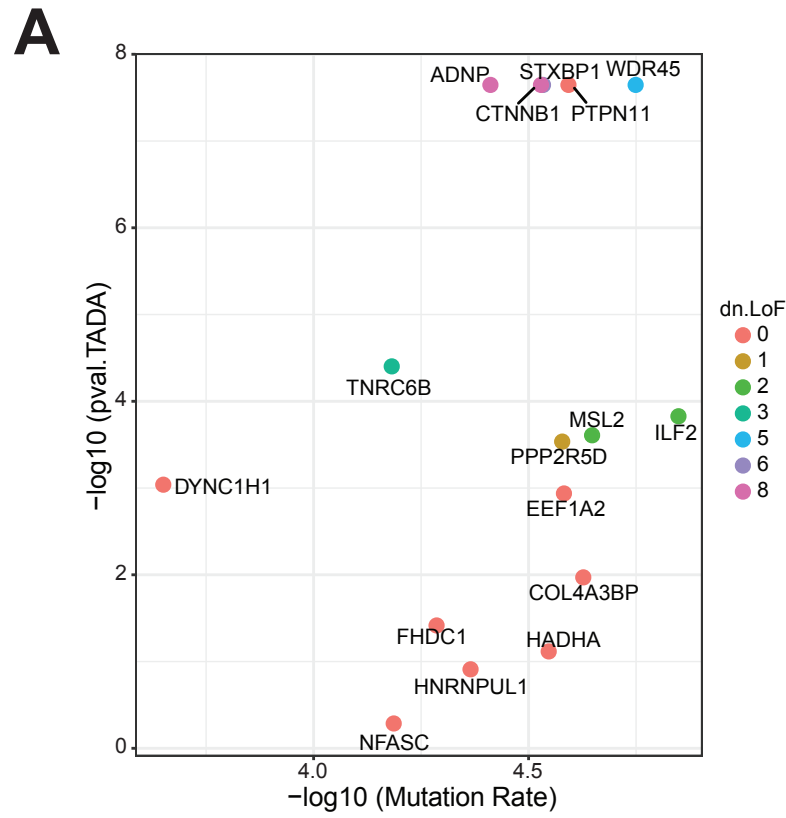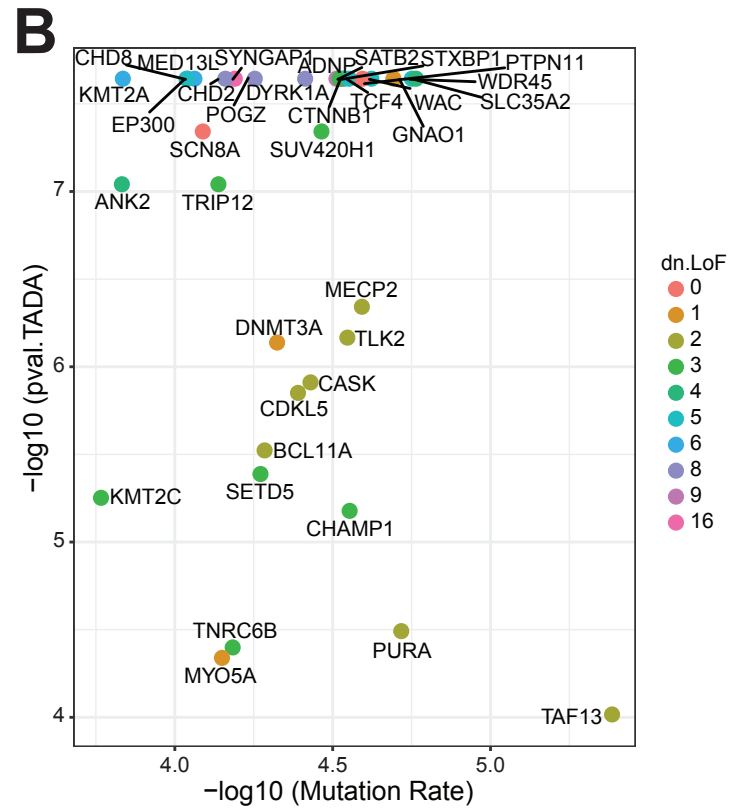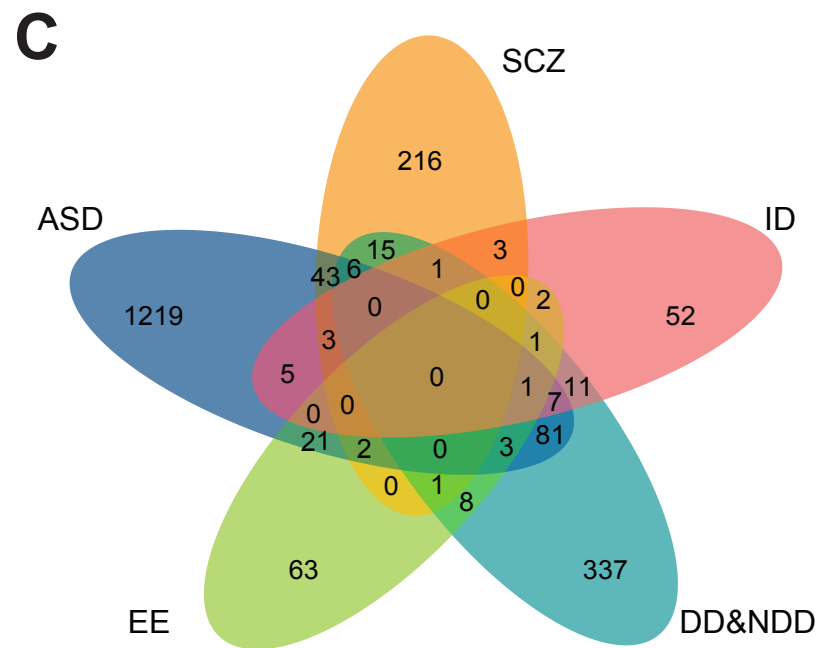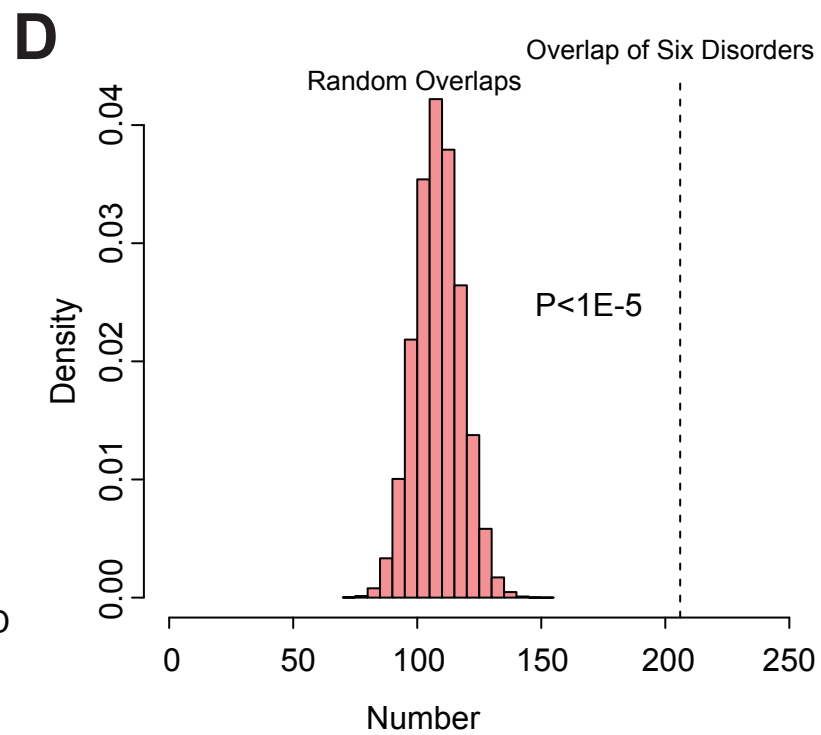

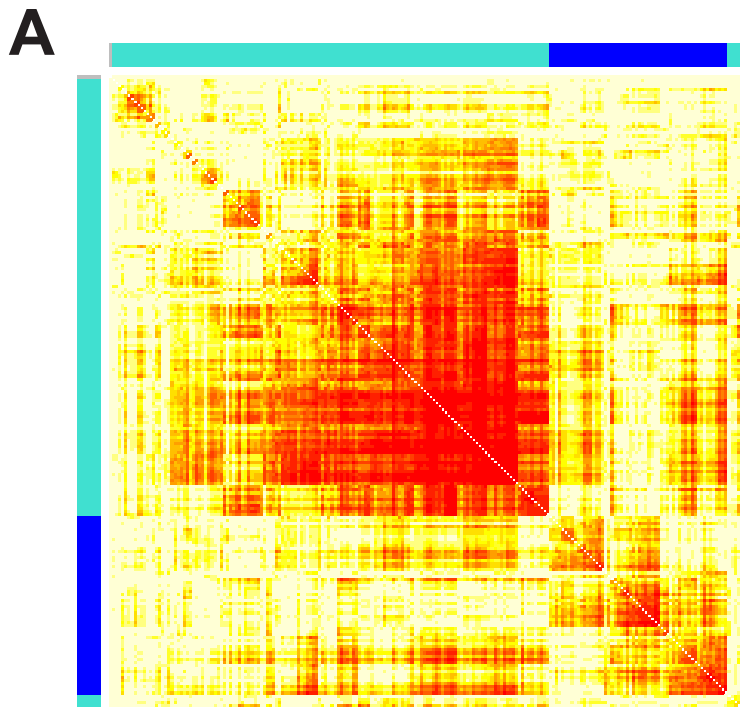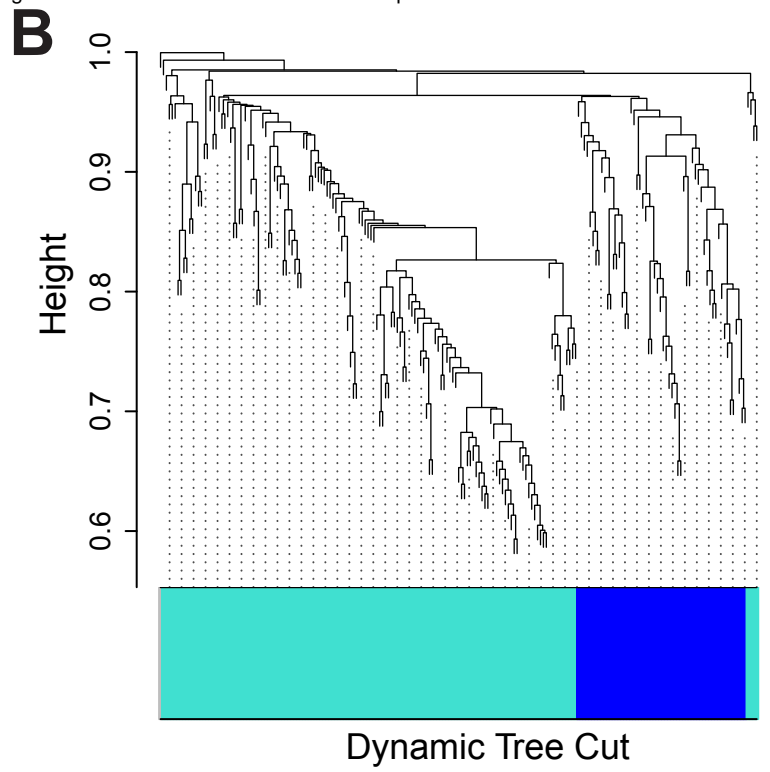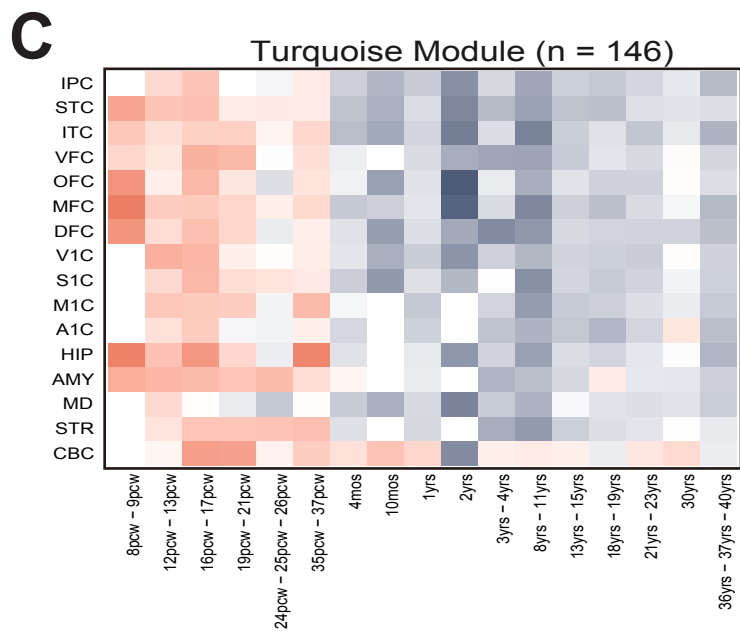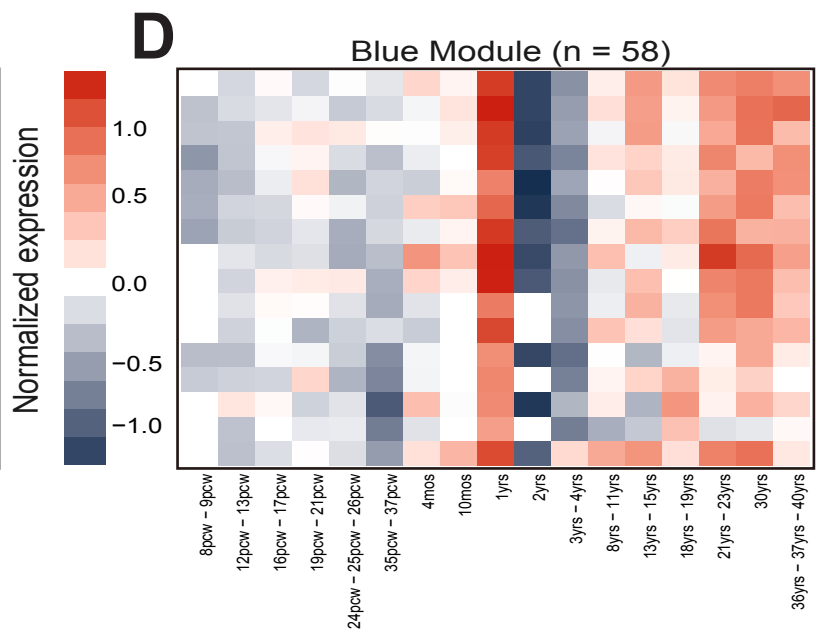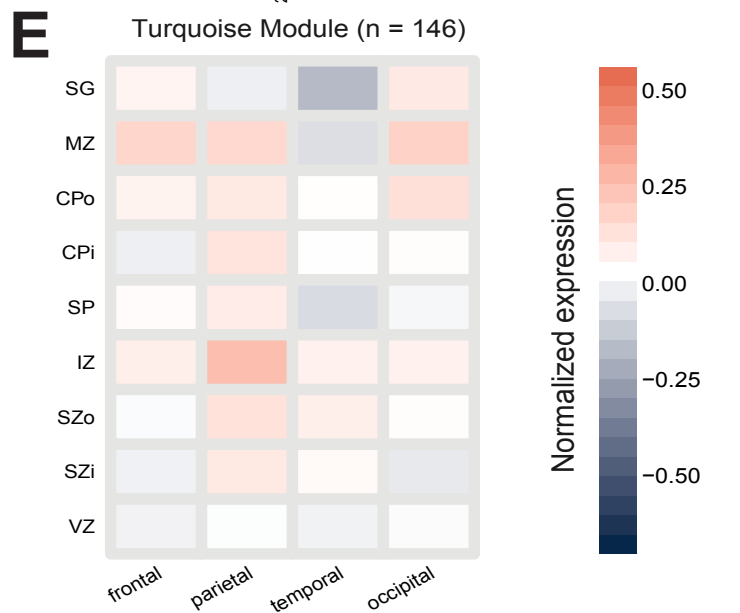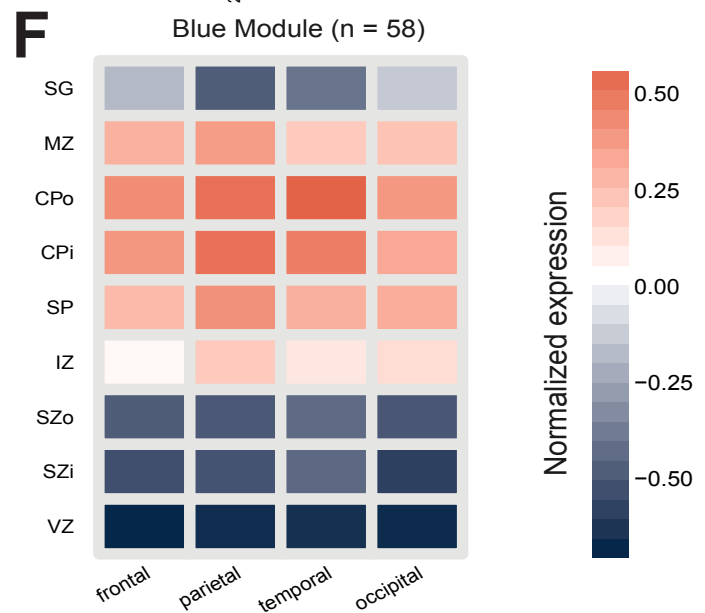

**A**

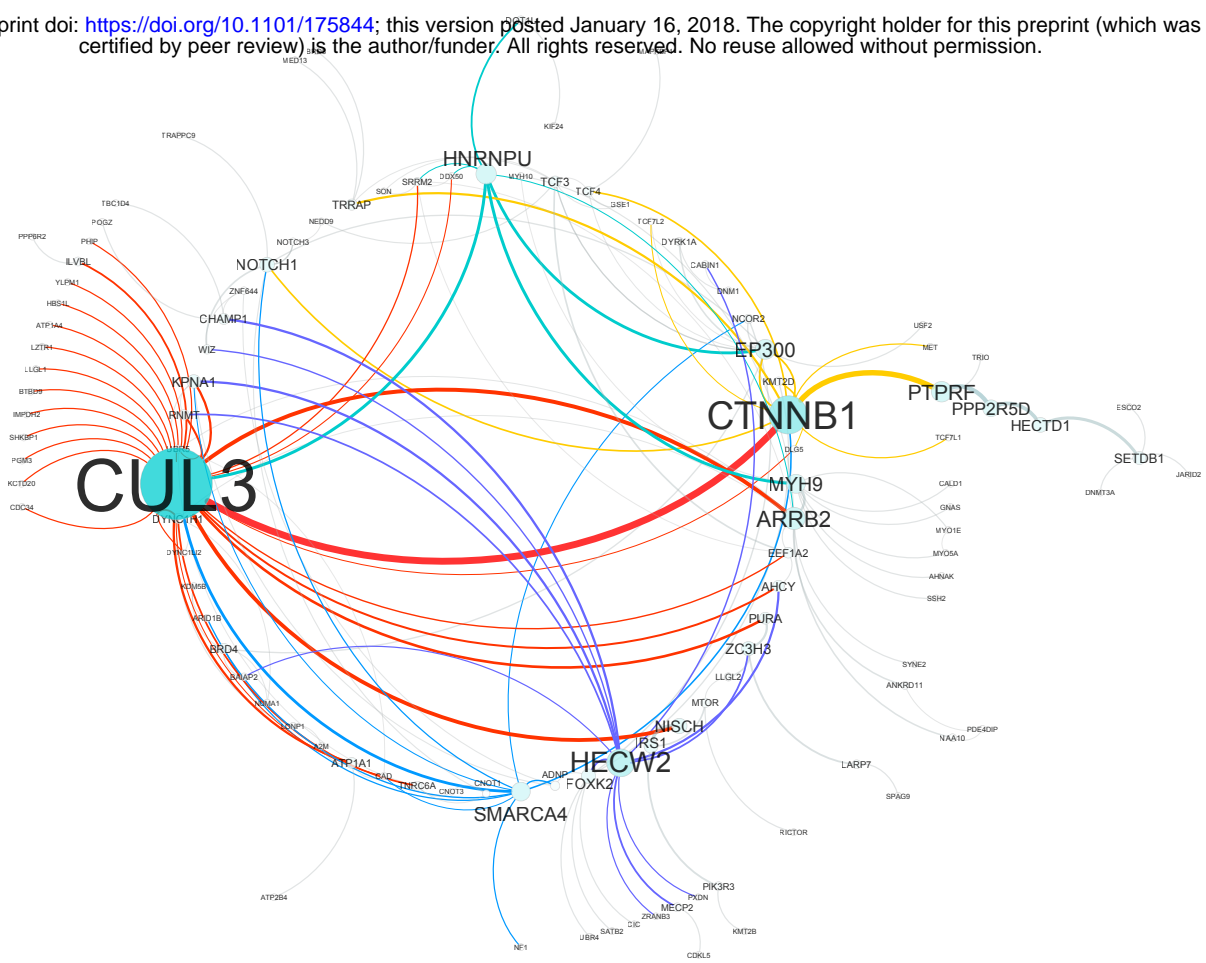

**B**

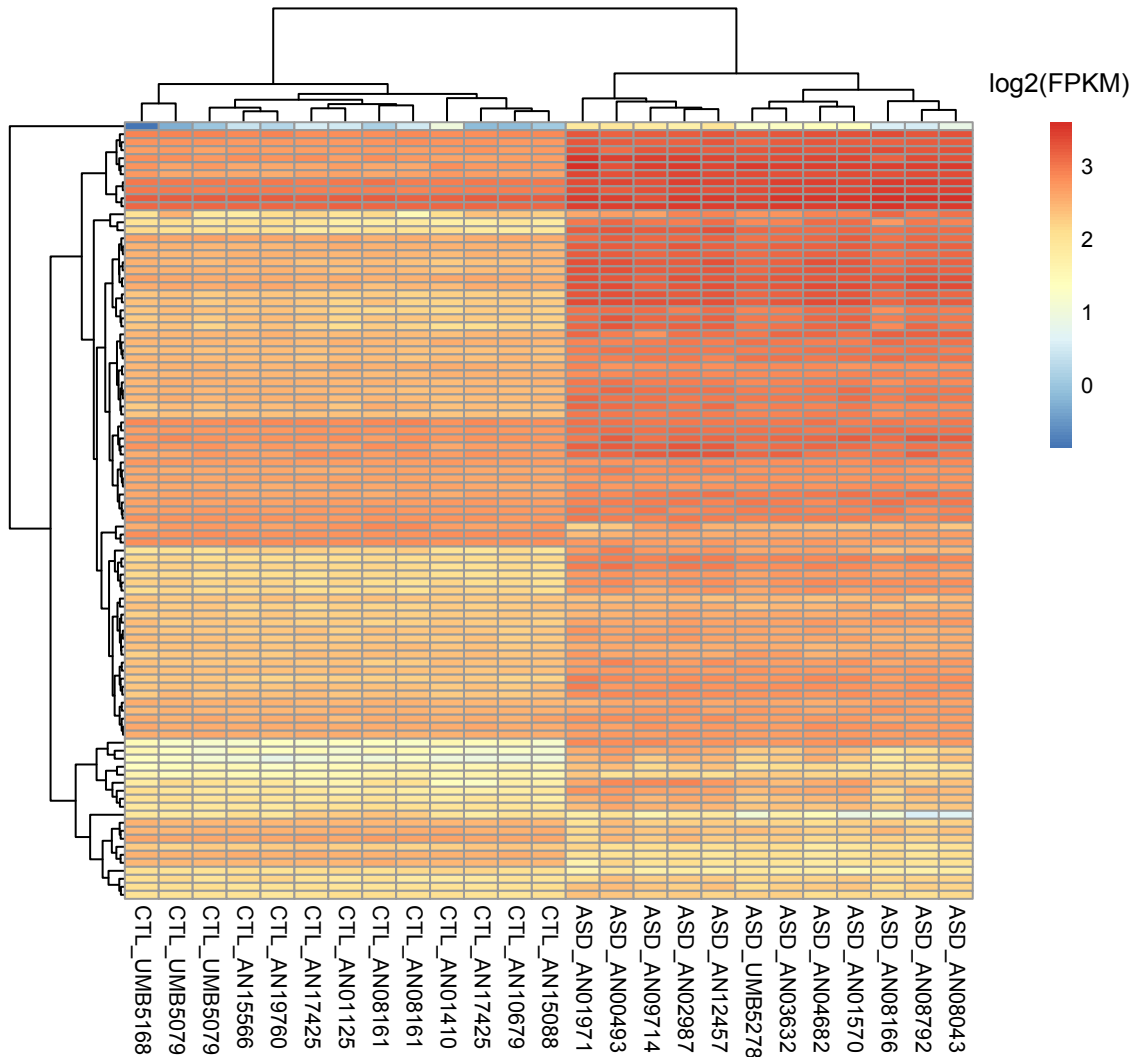



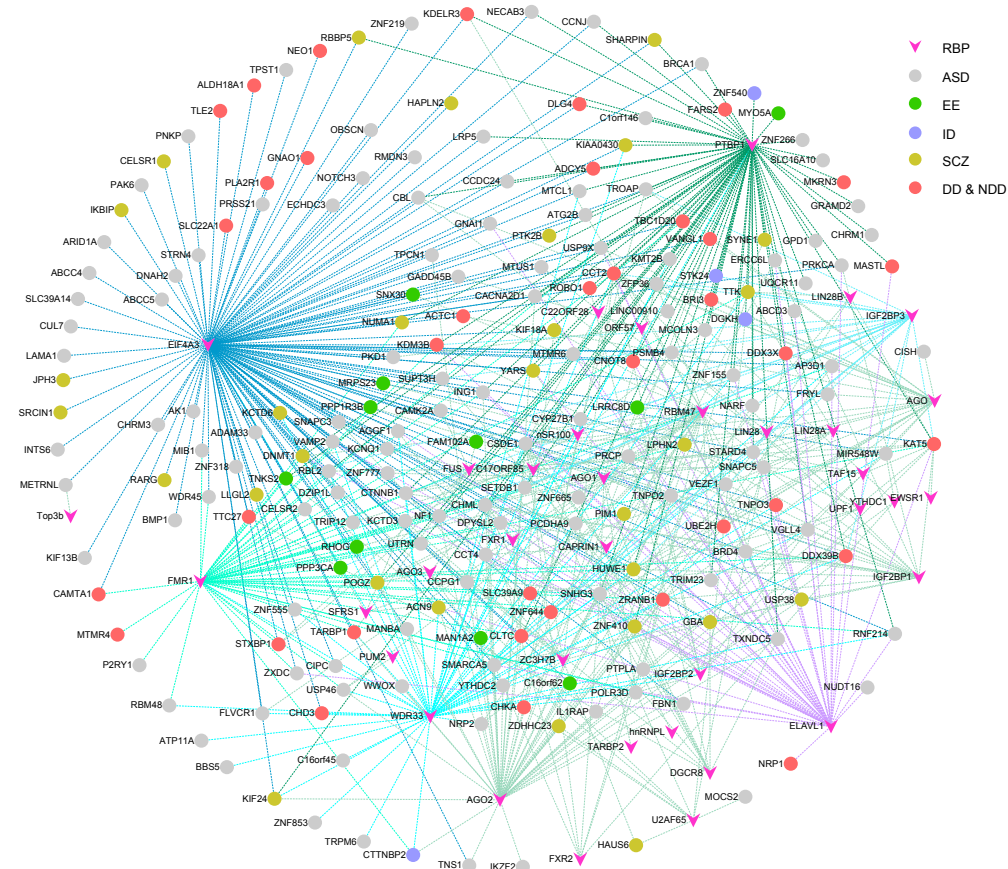

- ▼ RBP
- ASD
- EE
- ID
- SCZ
- DD & NDD

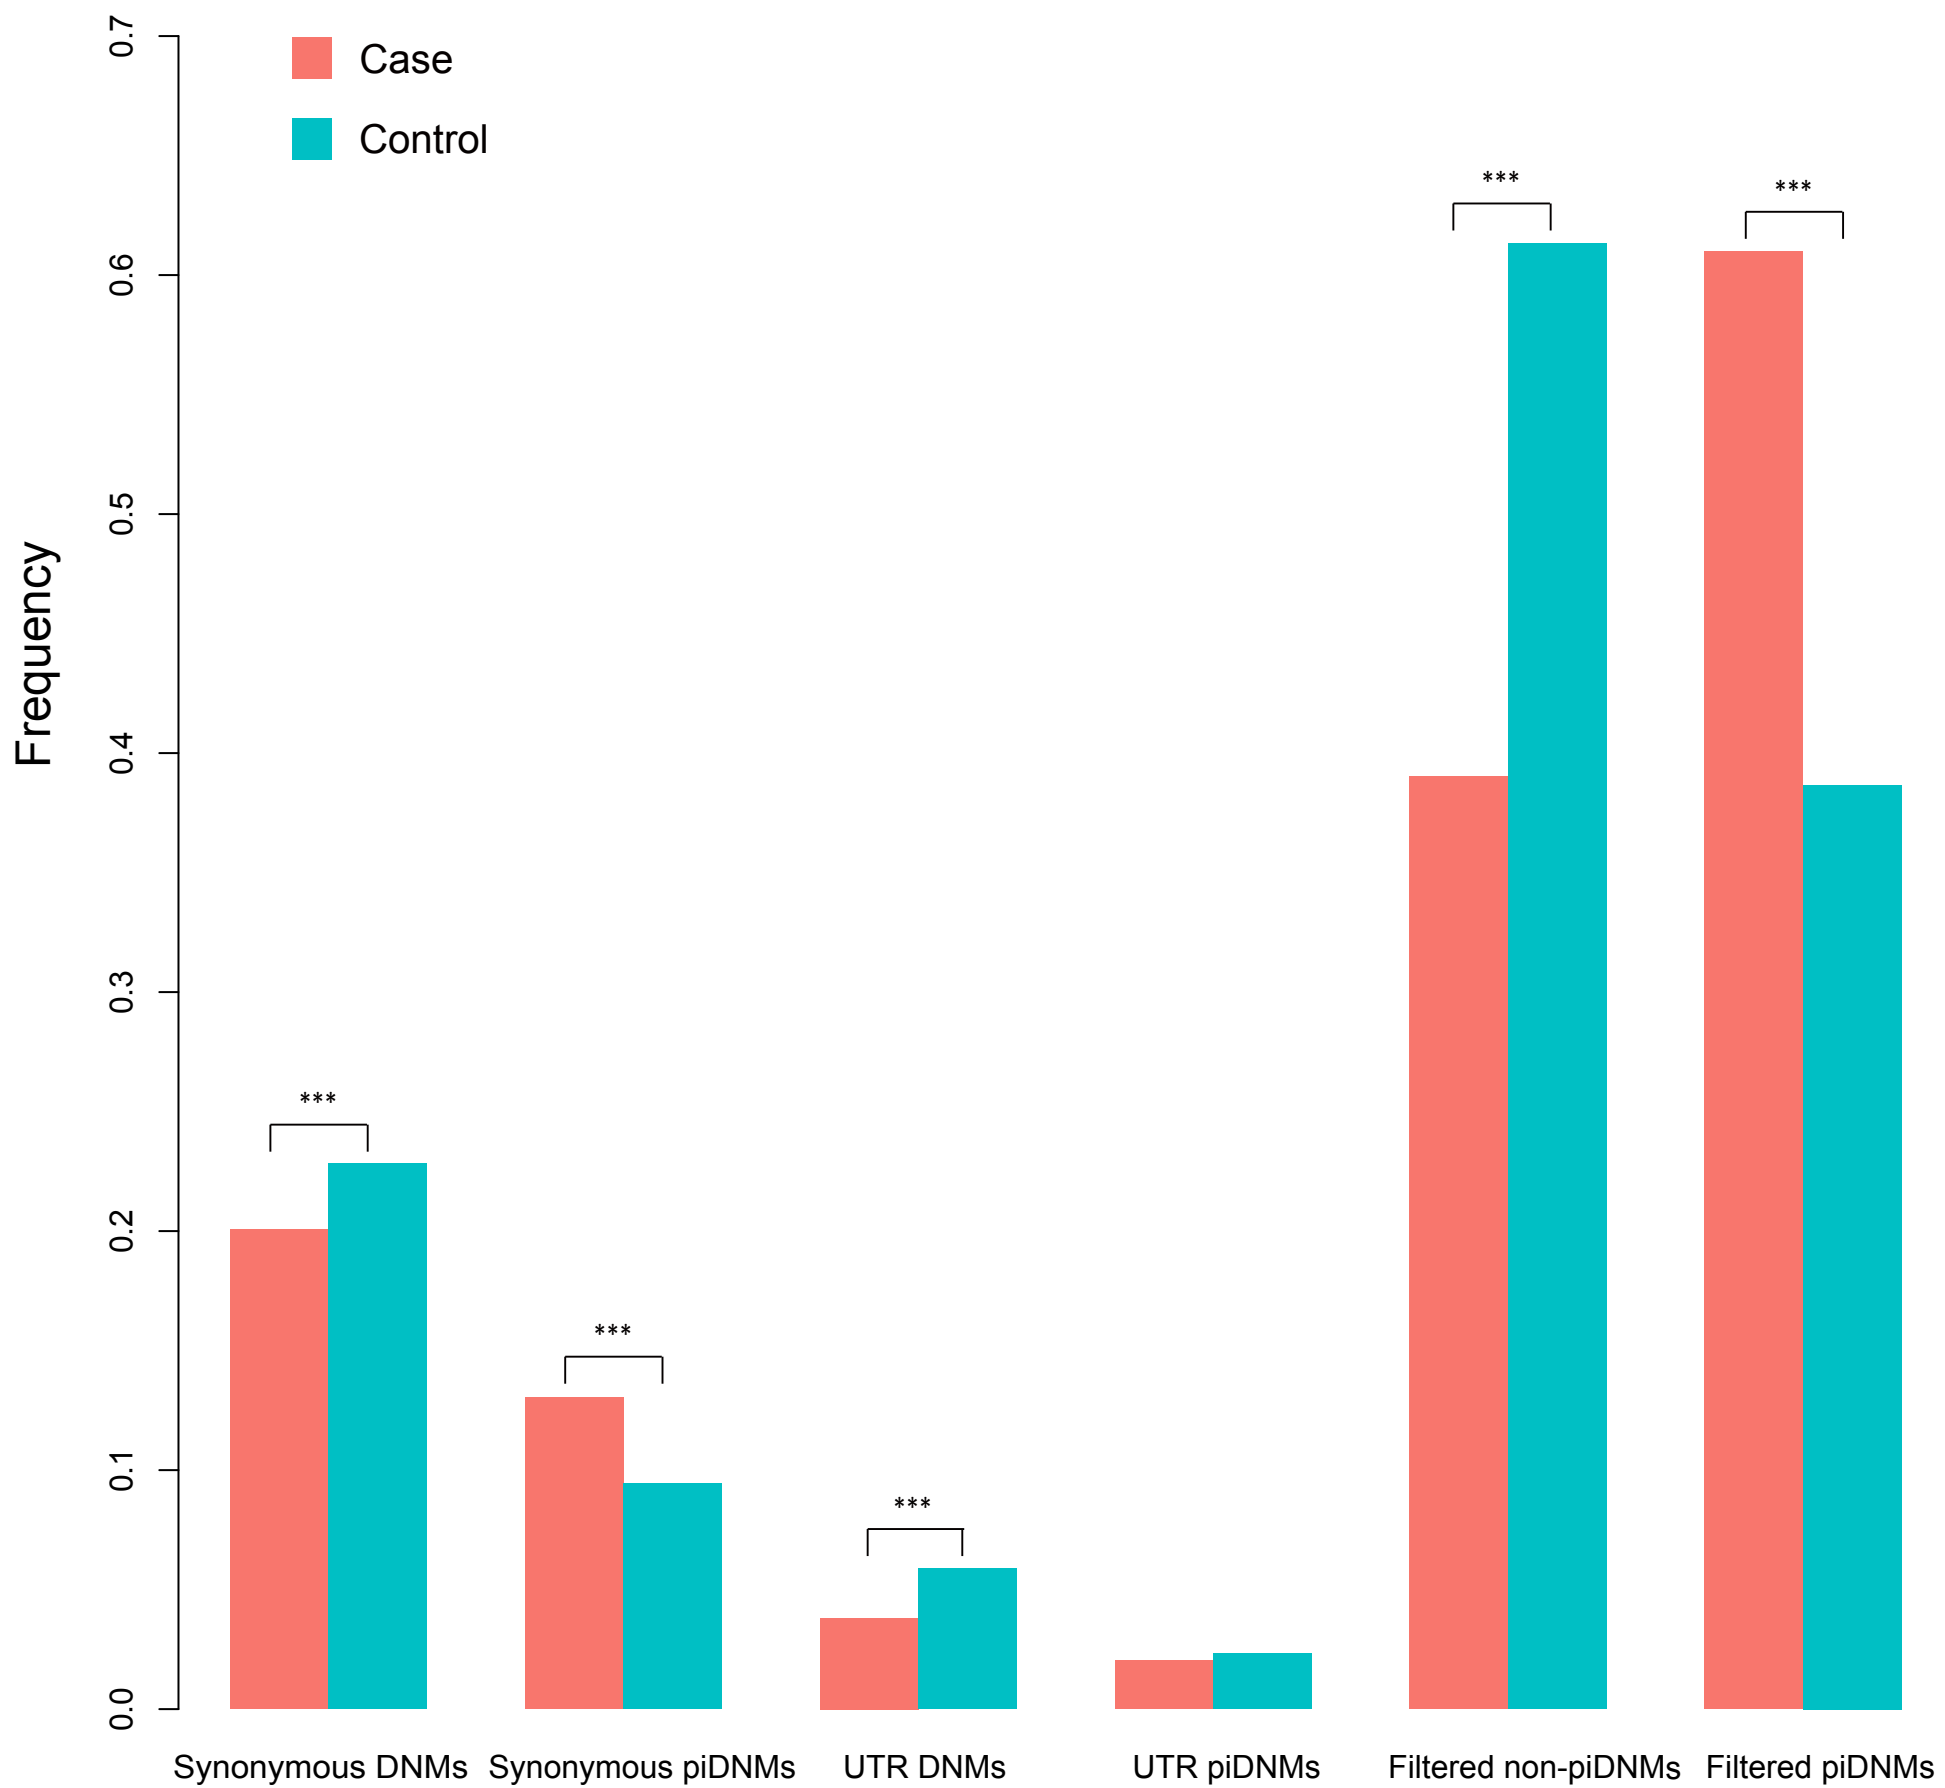

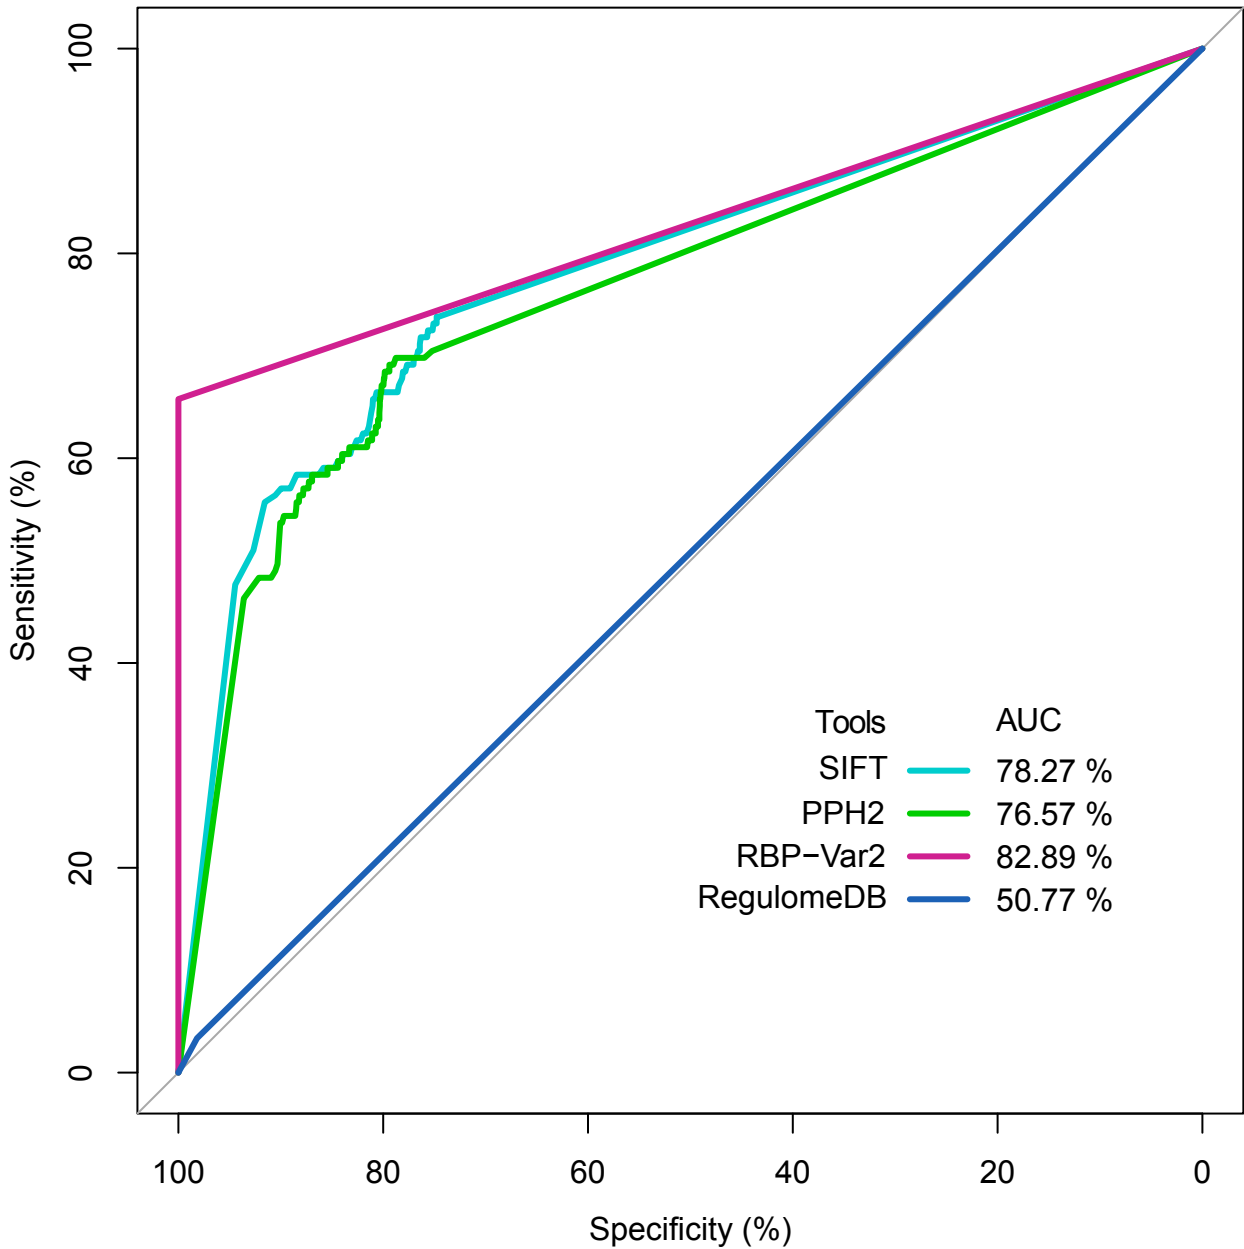

A

bioRxiv preprint doi: <https://doi.org/10.1101/175844>; this version posted January 16, 2018. The copyright holder for this preprint (which was not certified by peer review) is the author/funder. All rights reserved. No reuse allowed without permission.

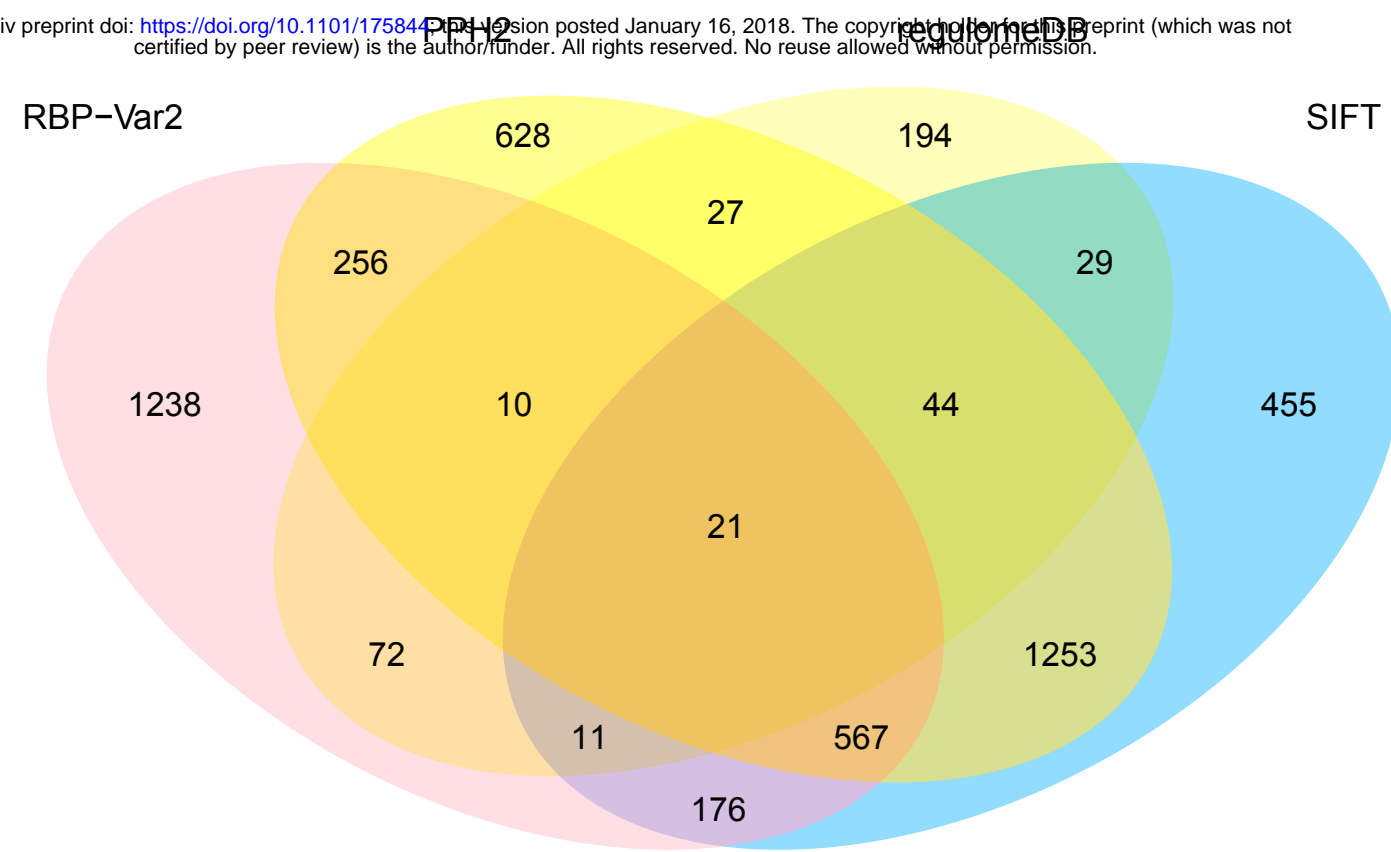

B

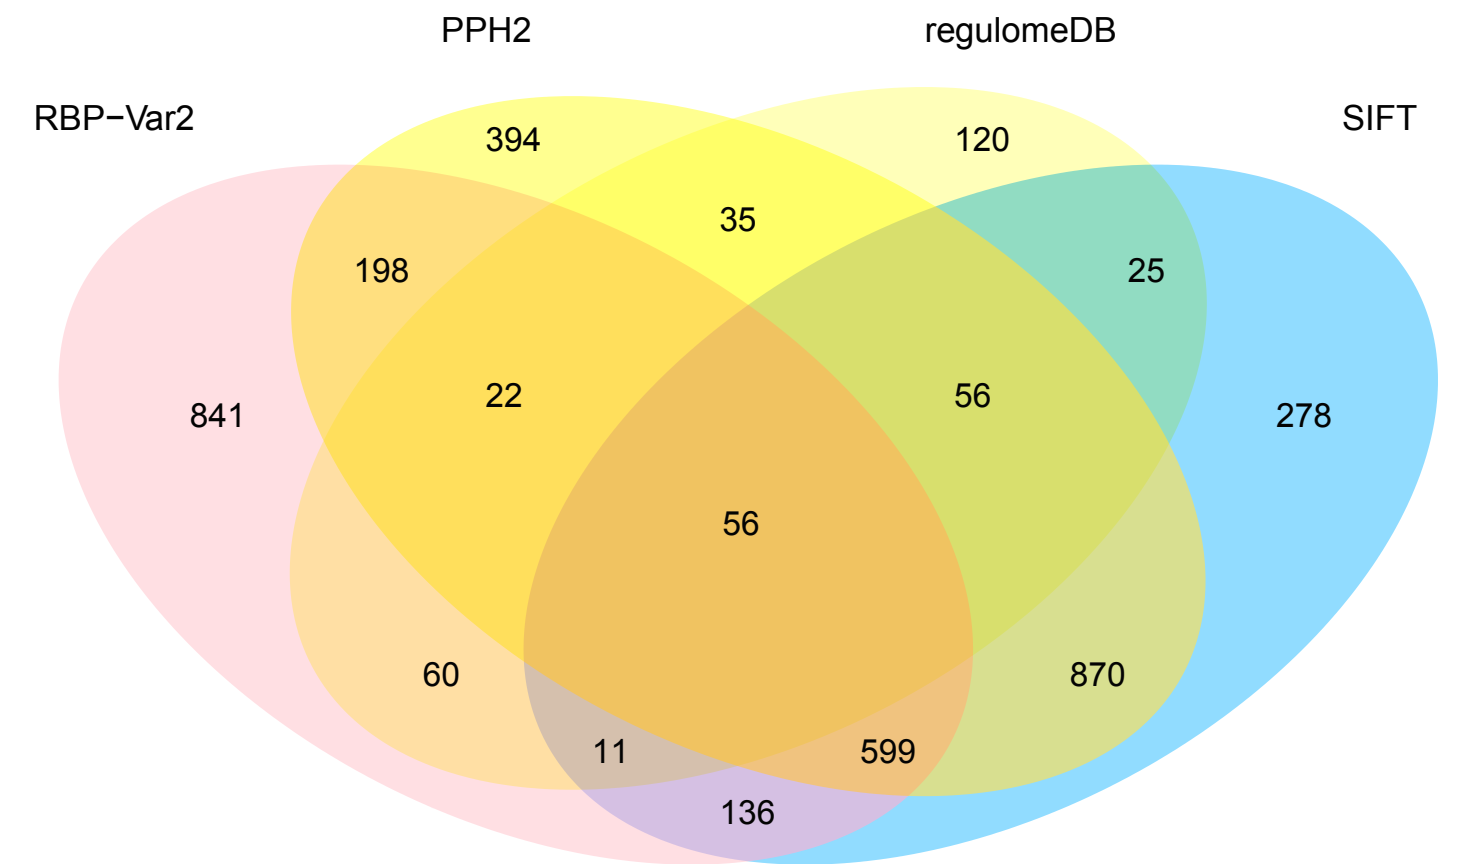

C

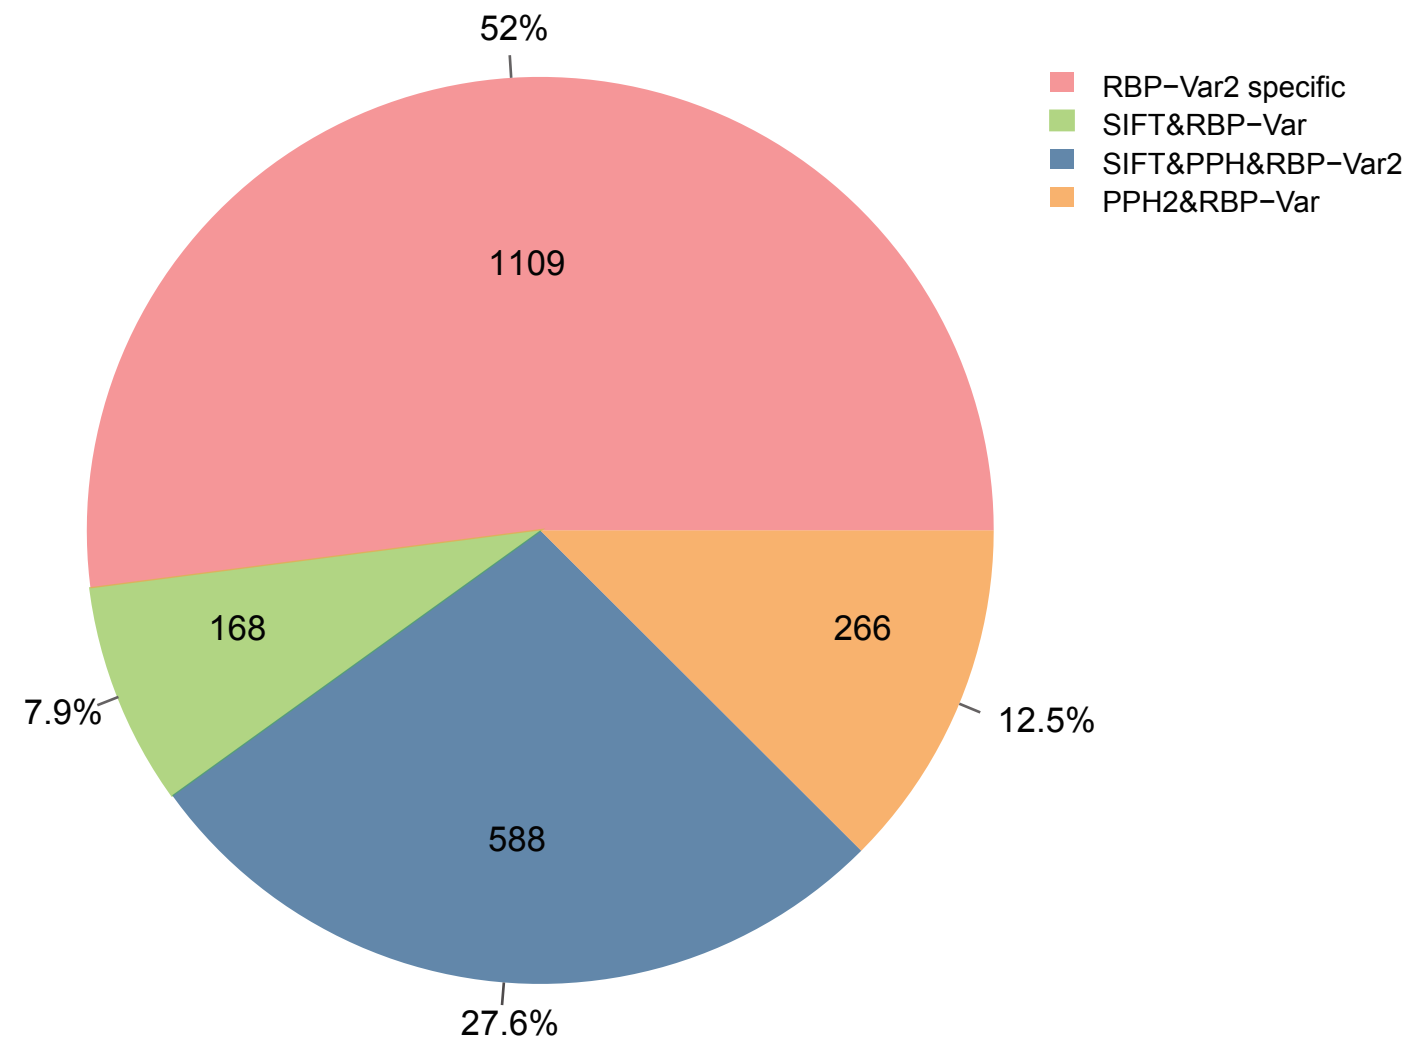

D

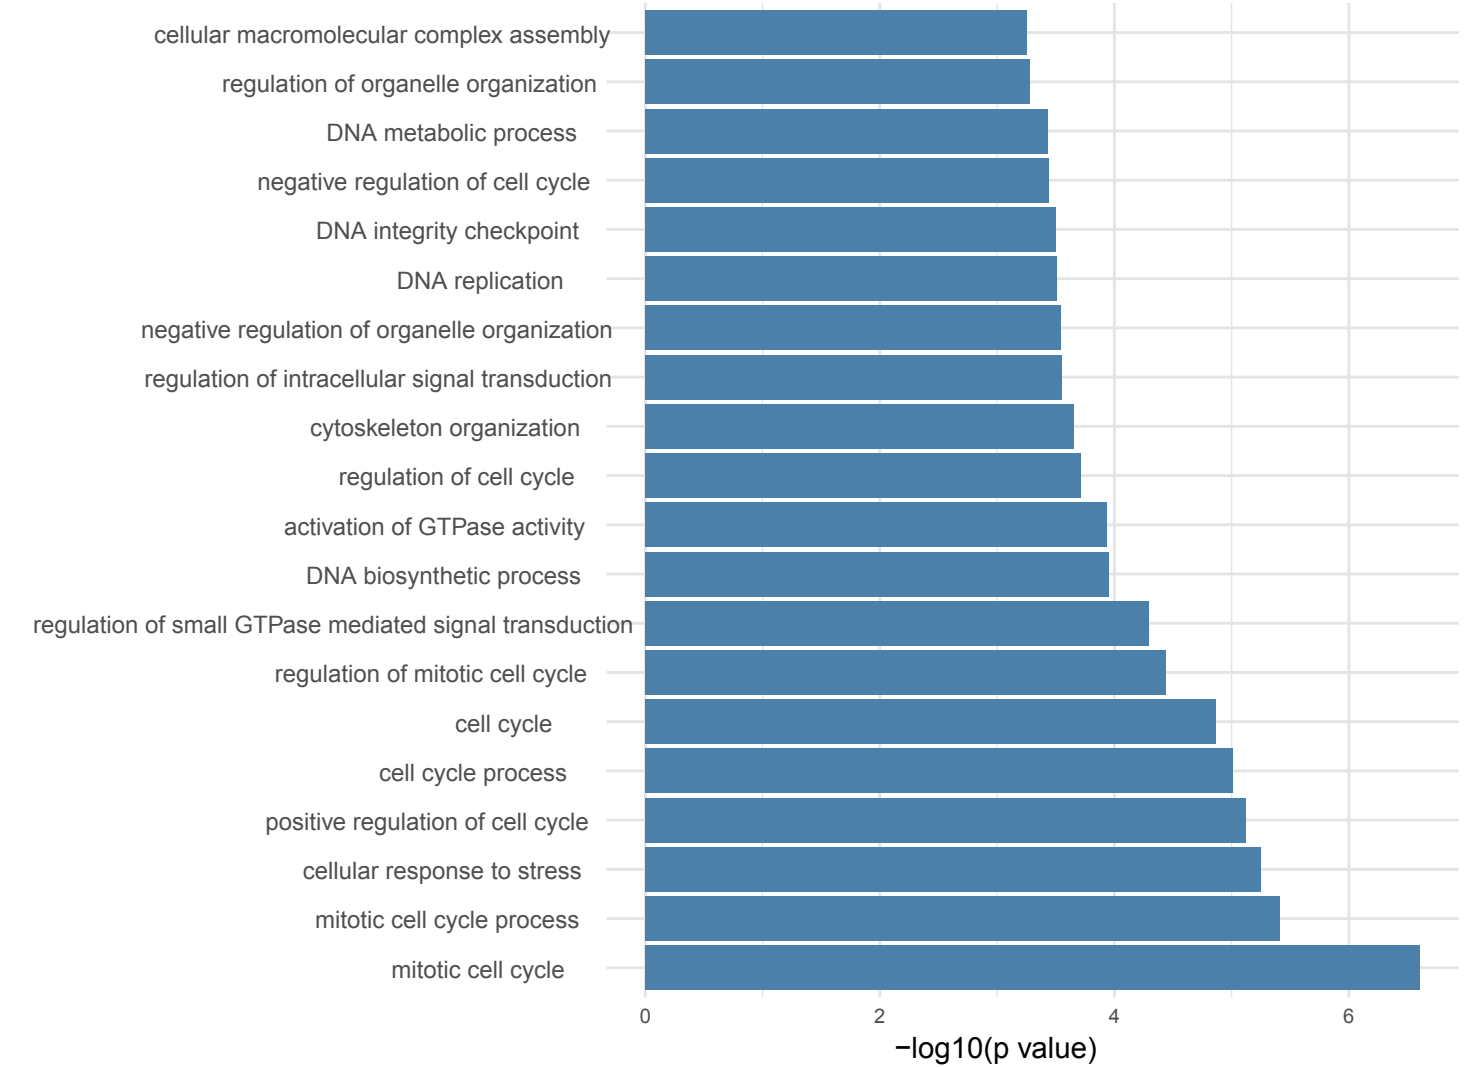

**A** 214 shared genes vs. Control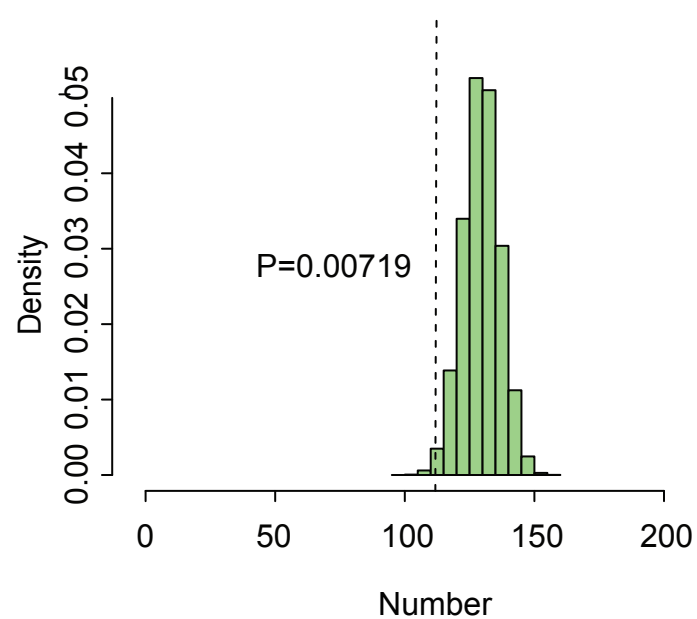**B** ASD vs. Control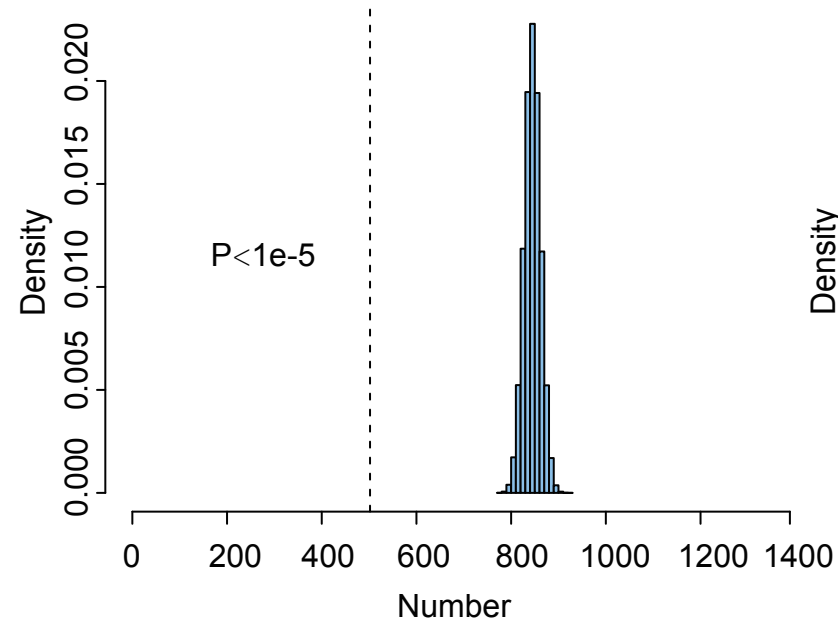**C** ID vs. Control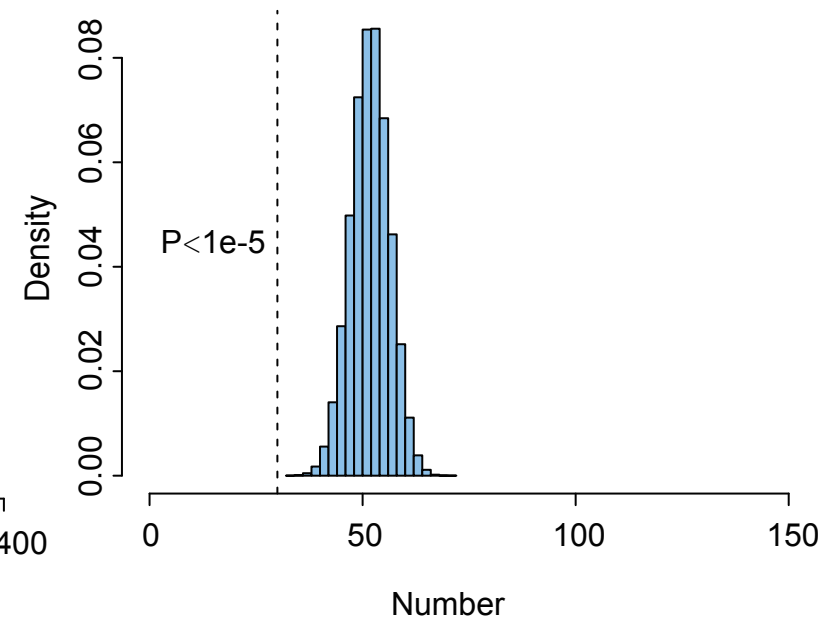**D** EE vs. Control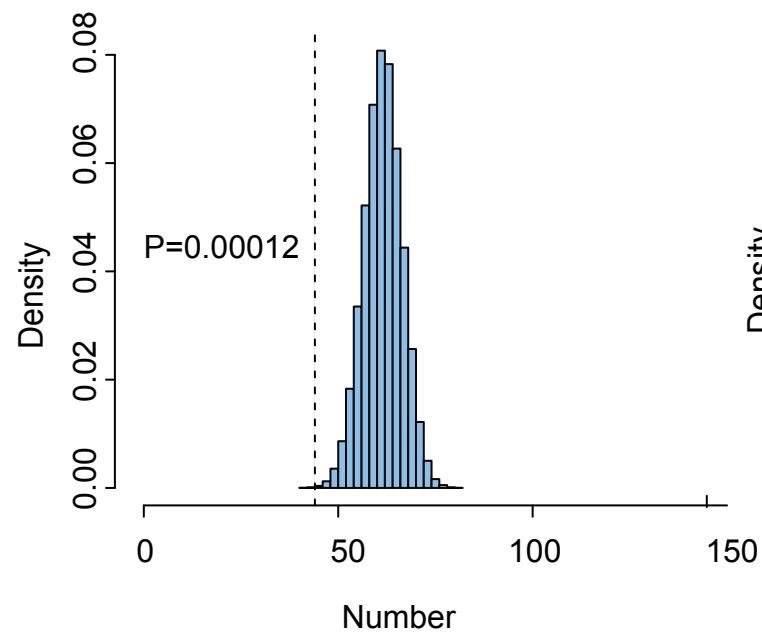**E** SCZ vs. Control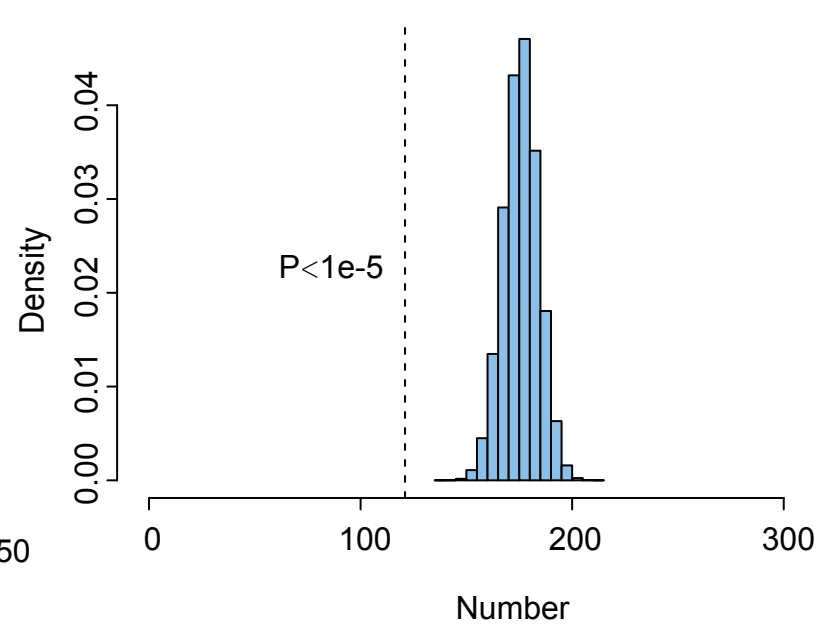**F** DD&NDD vs. Control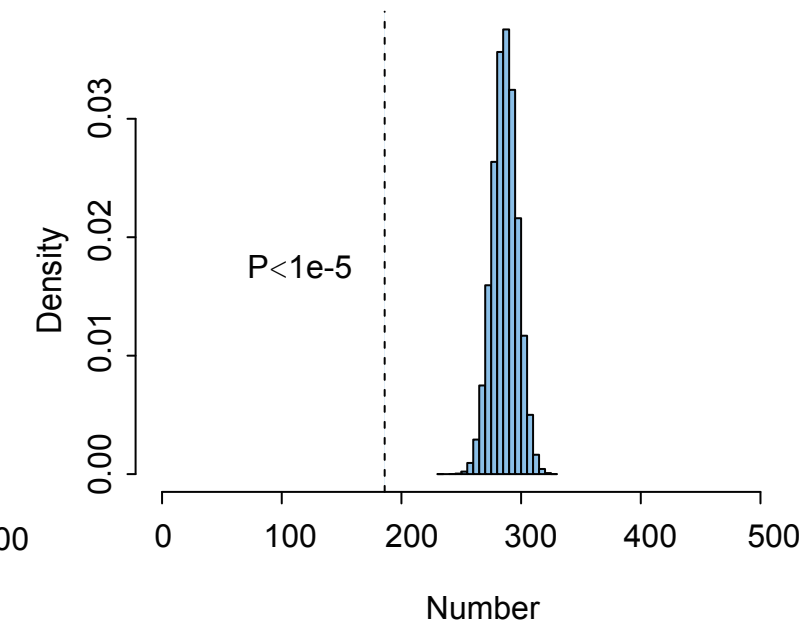

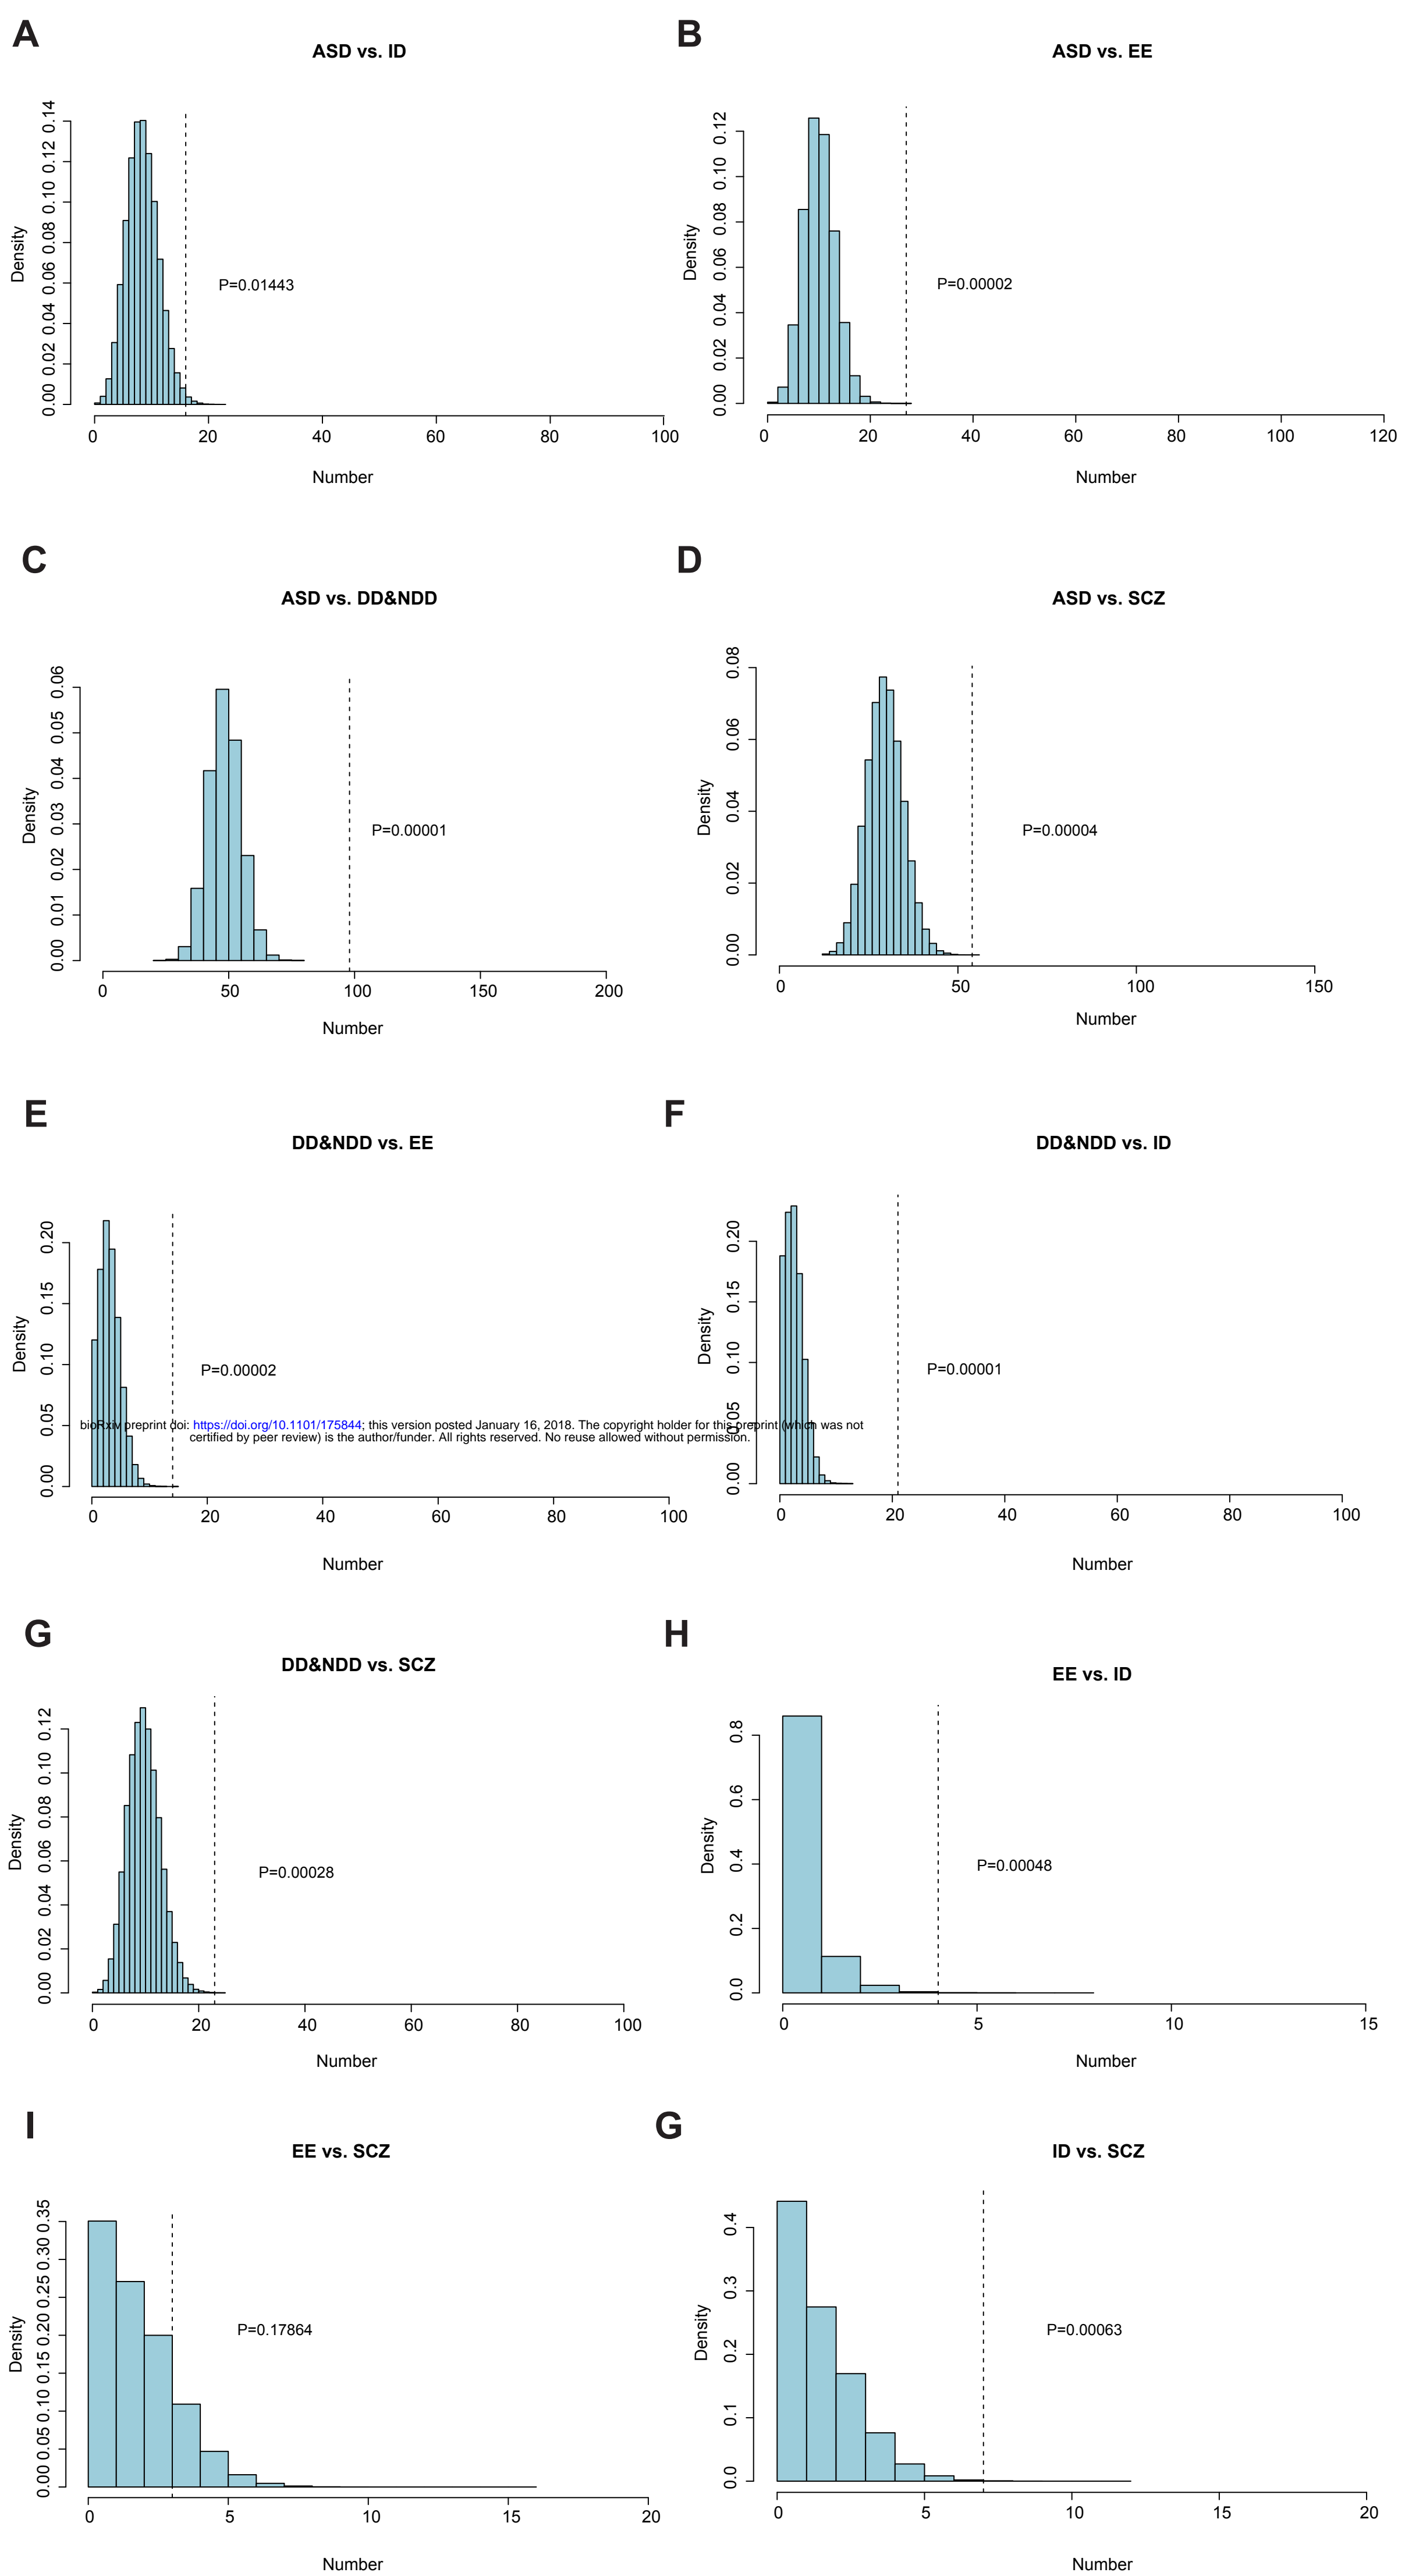

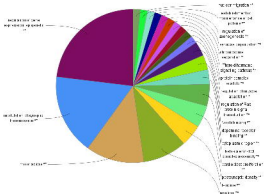



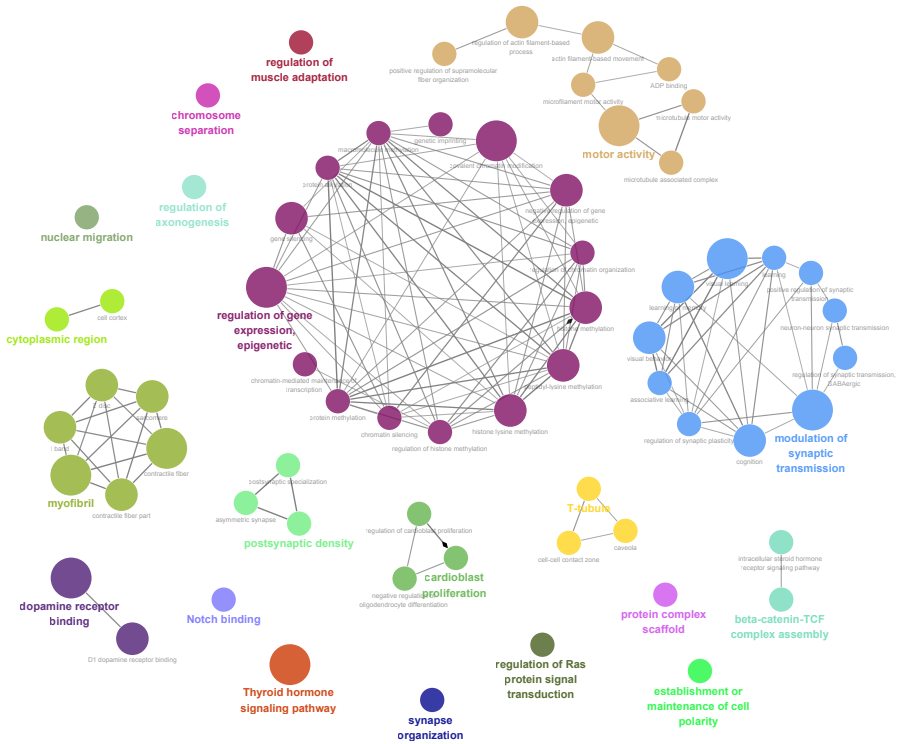

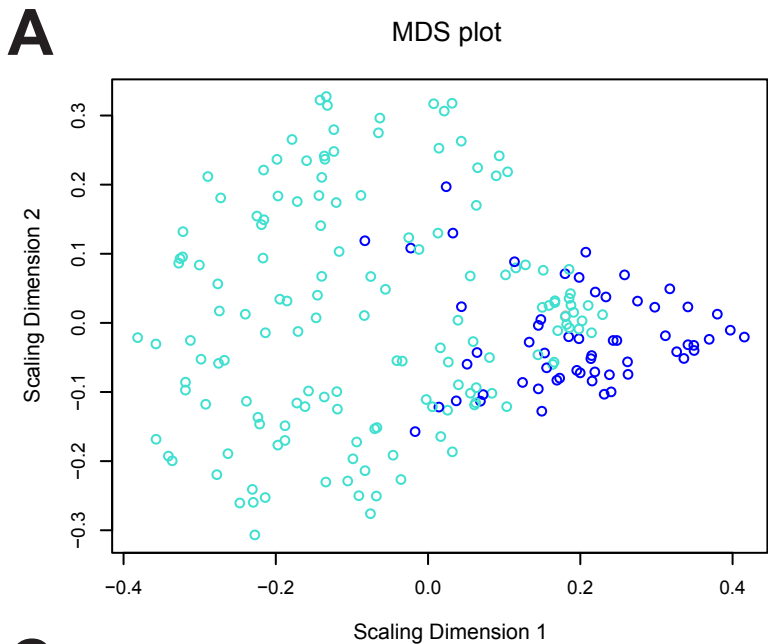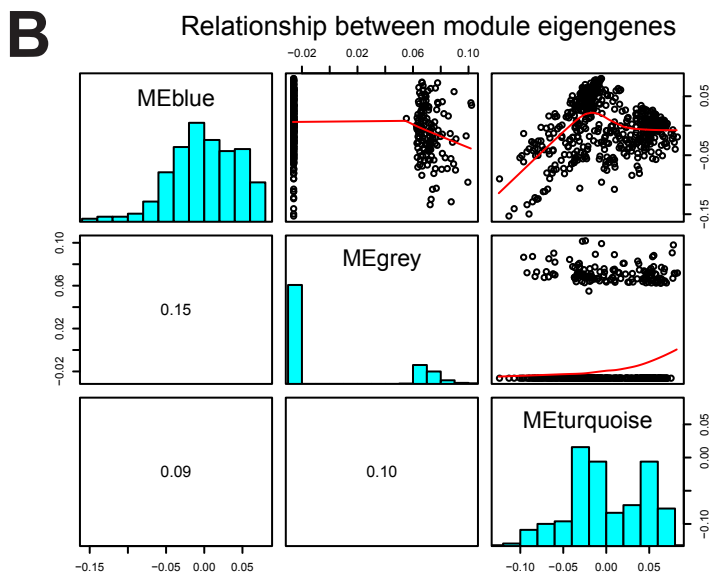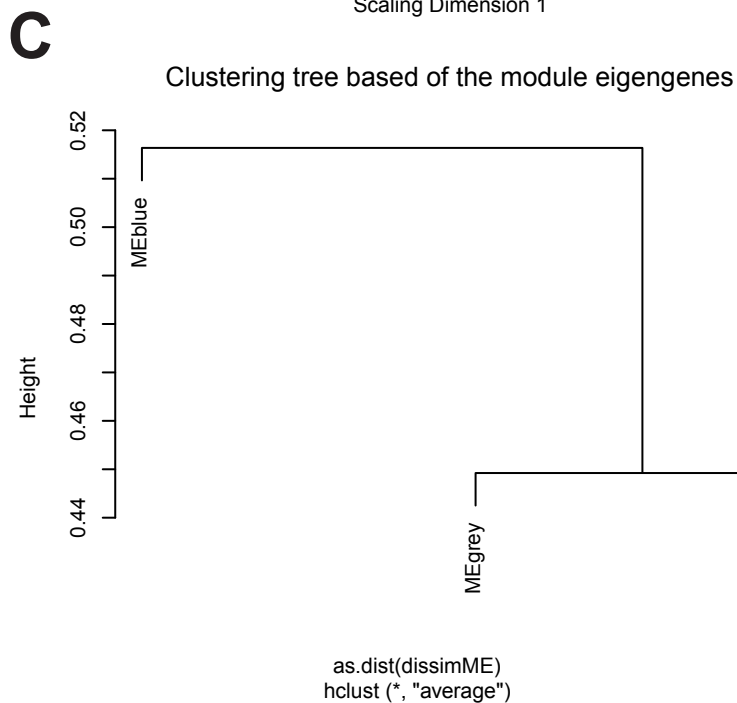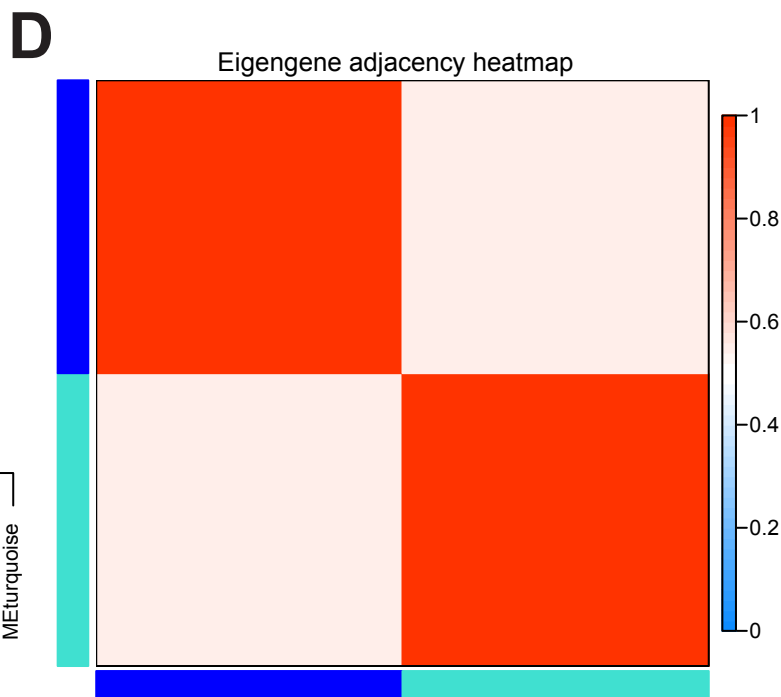

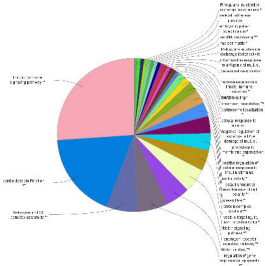

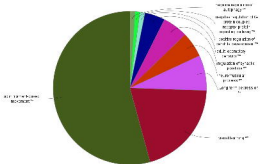

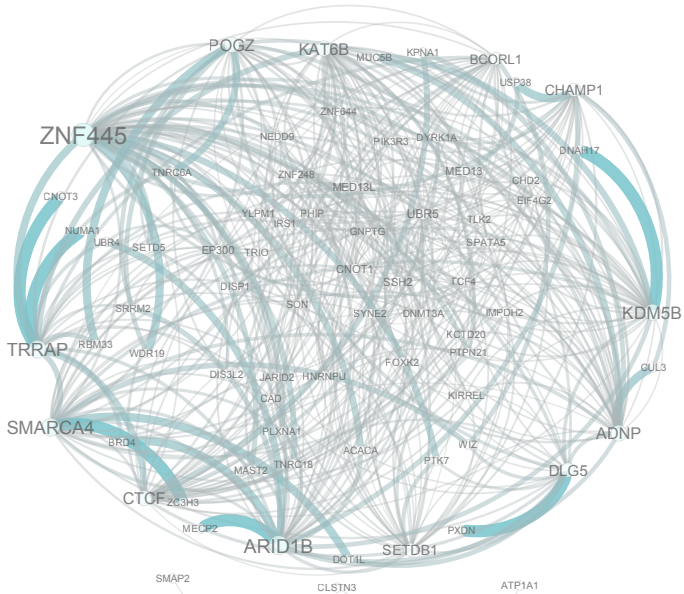

# STXB1

**A**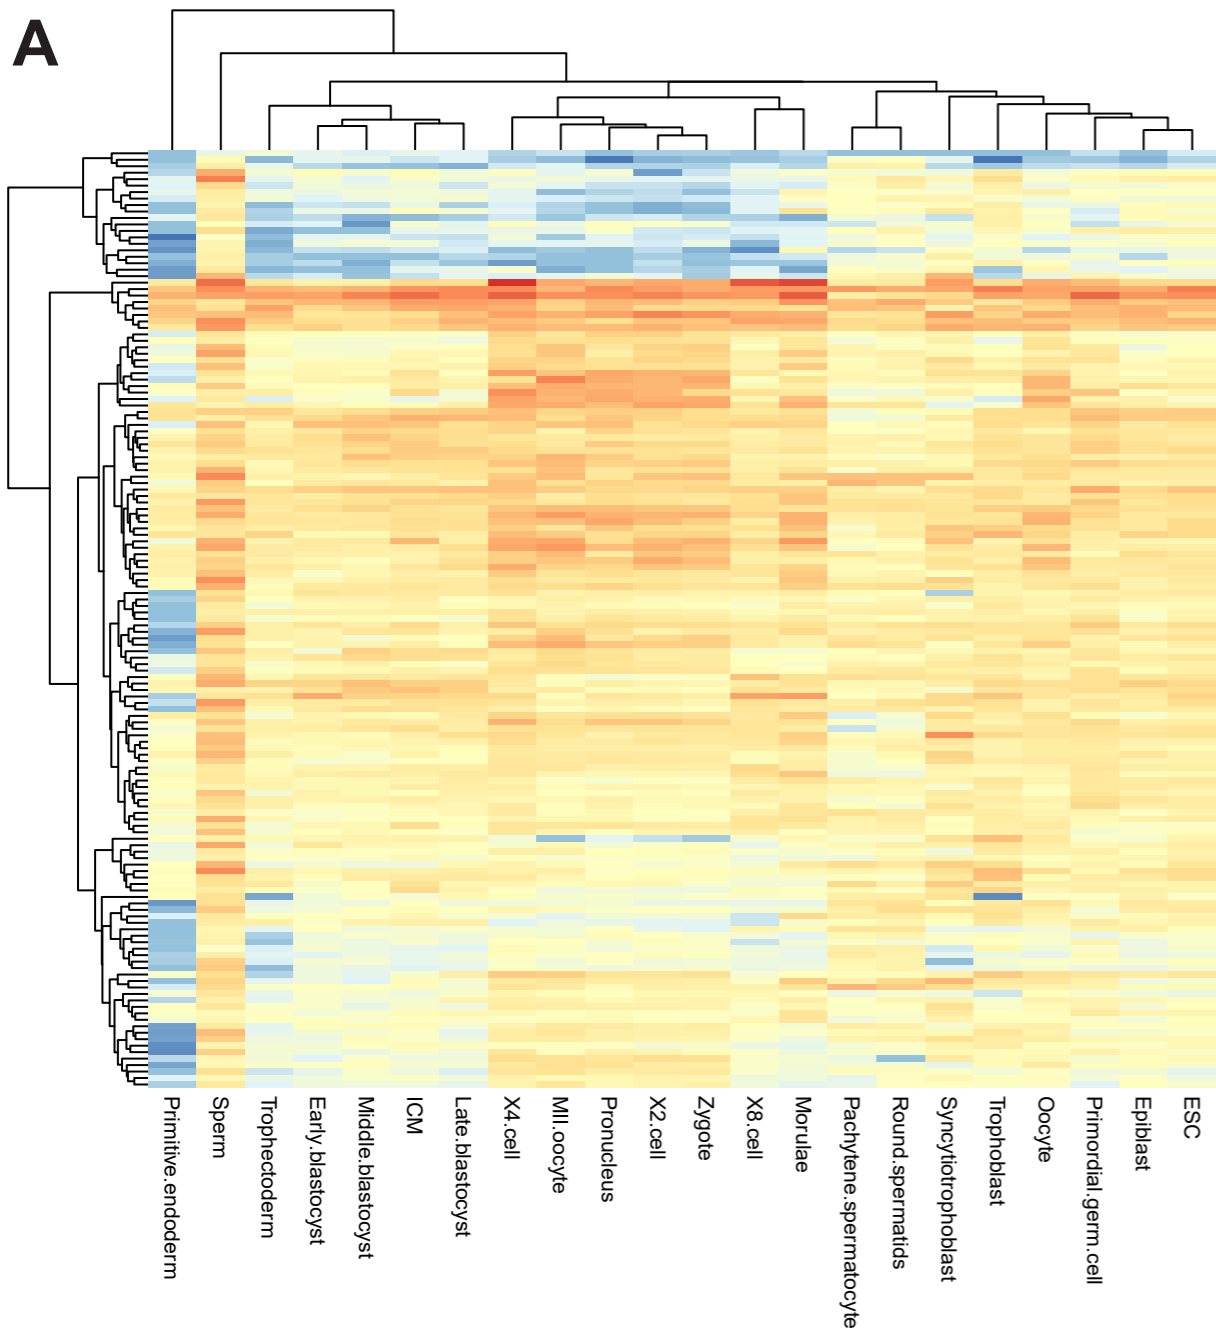**B**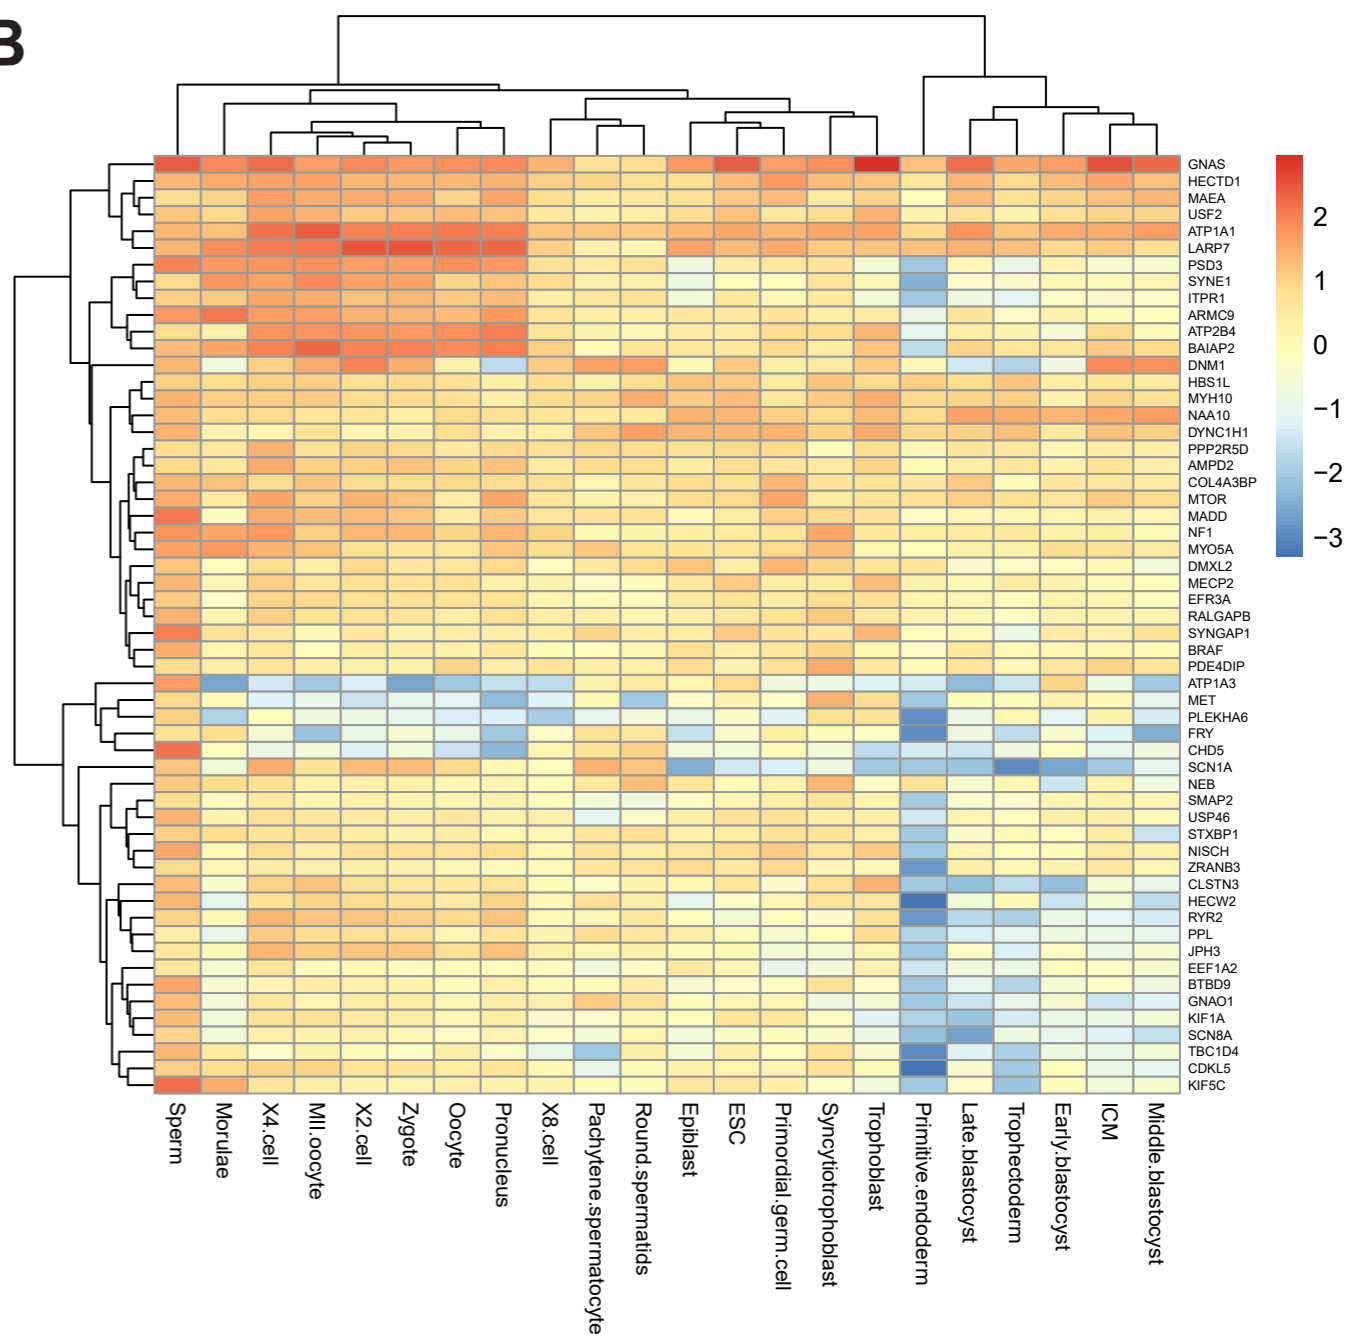

**A**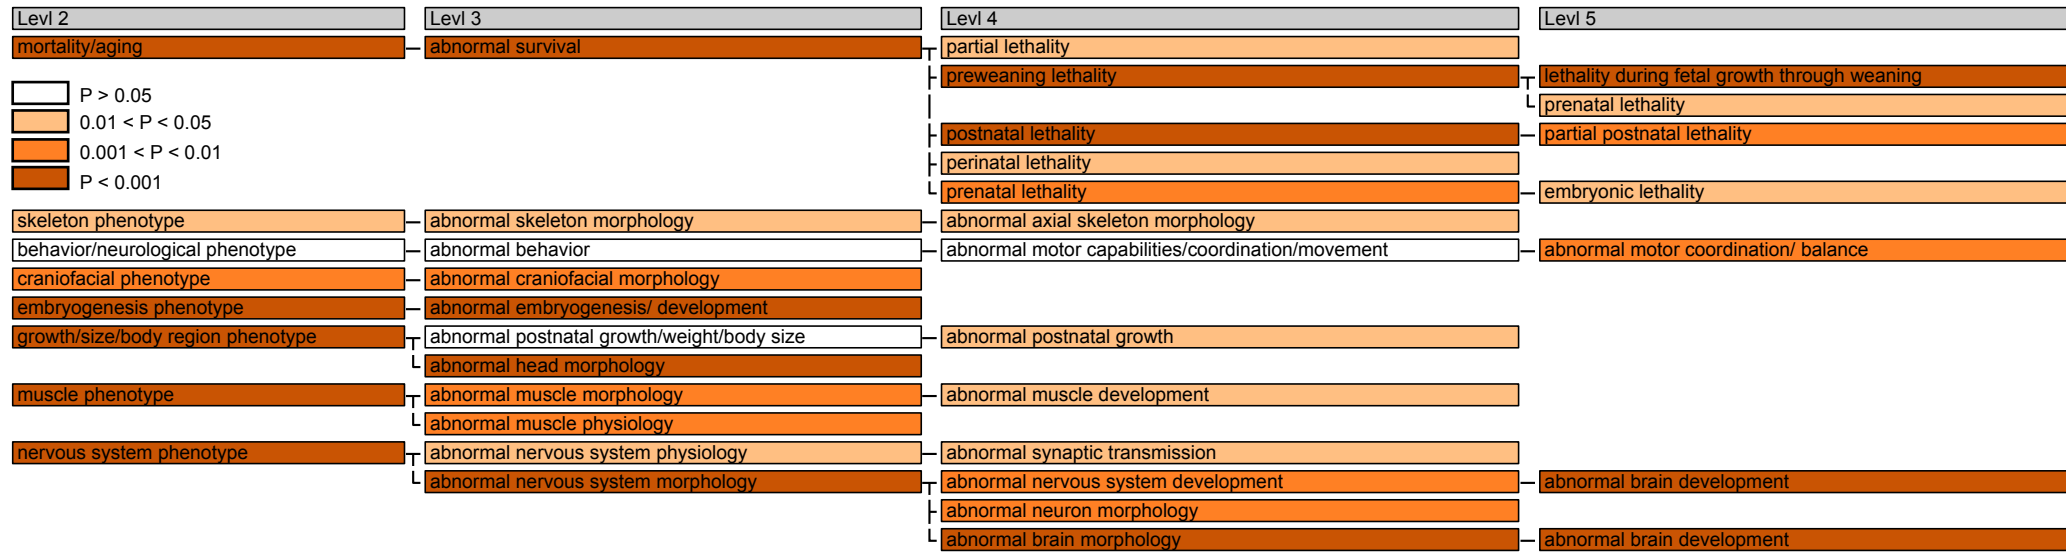**B**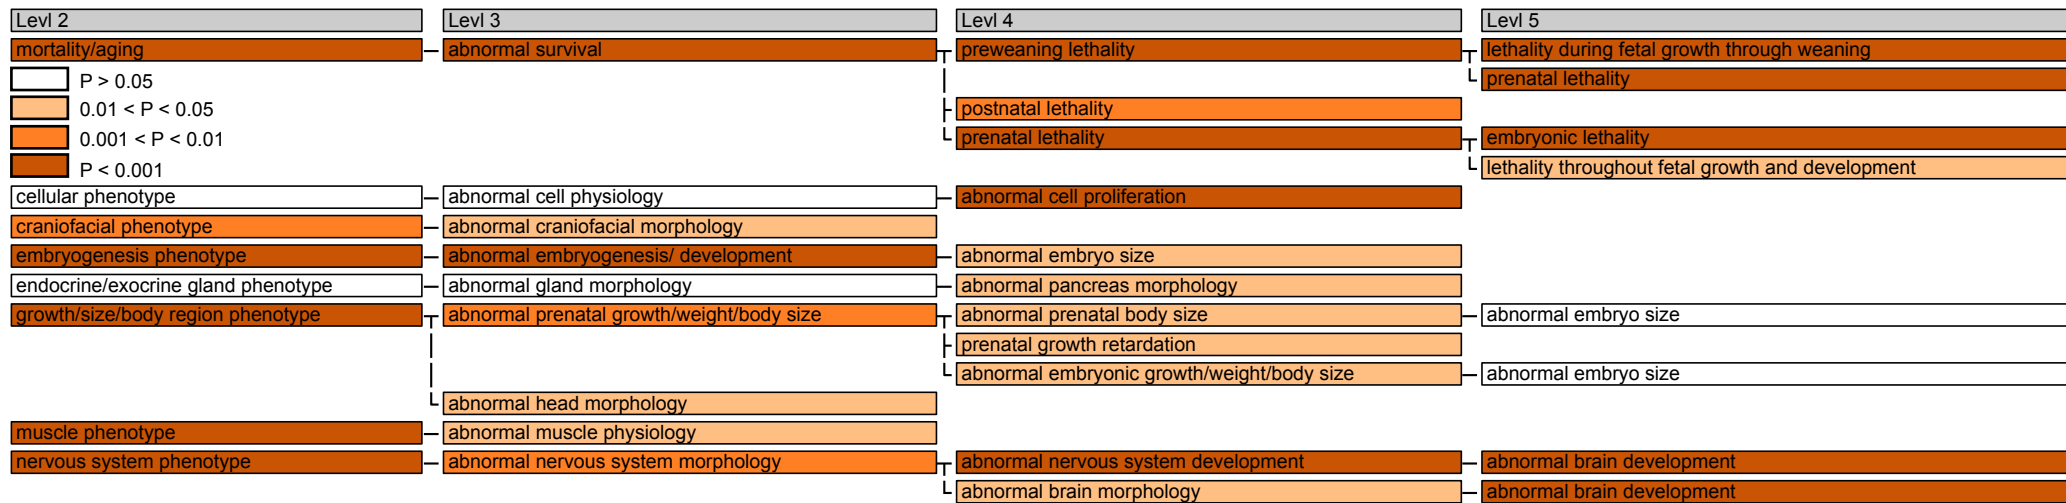



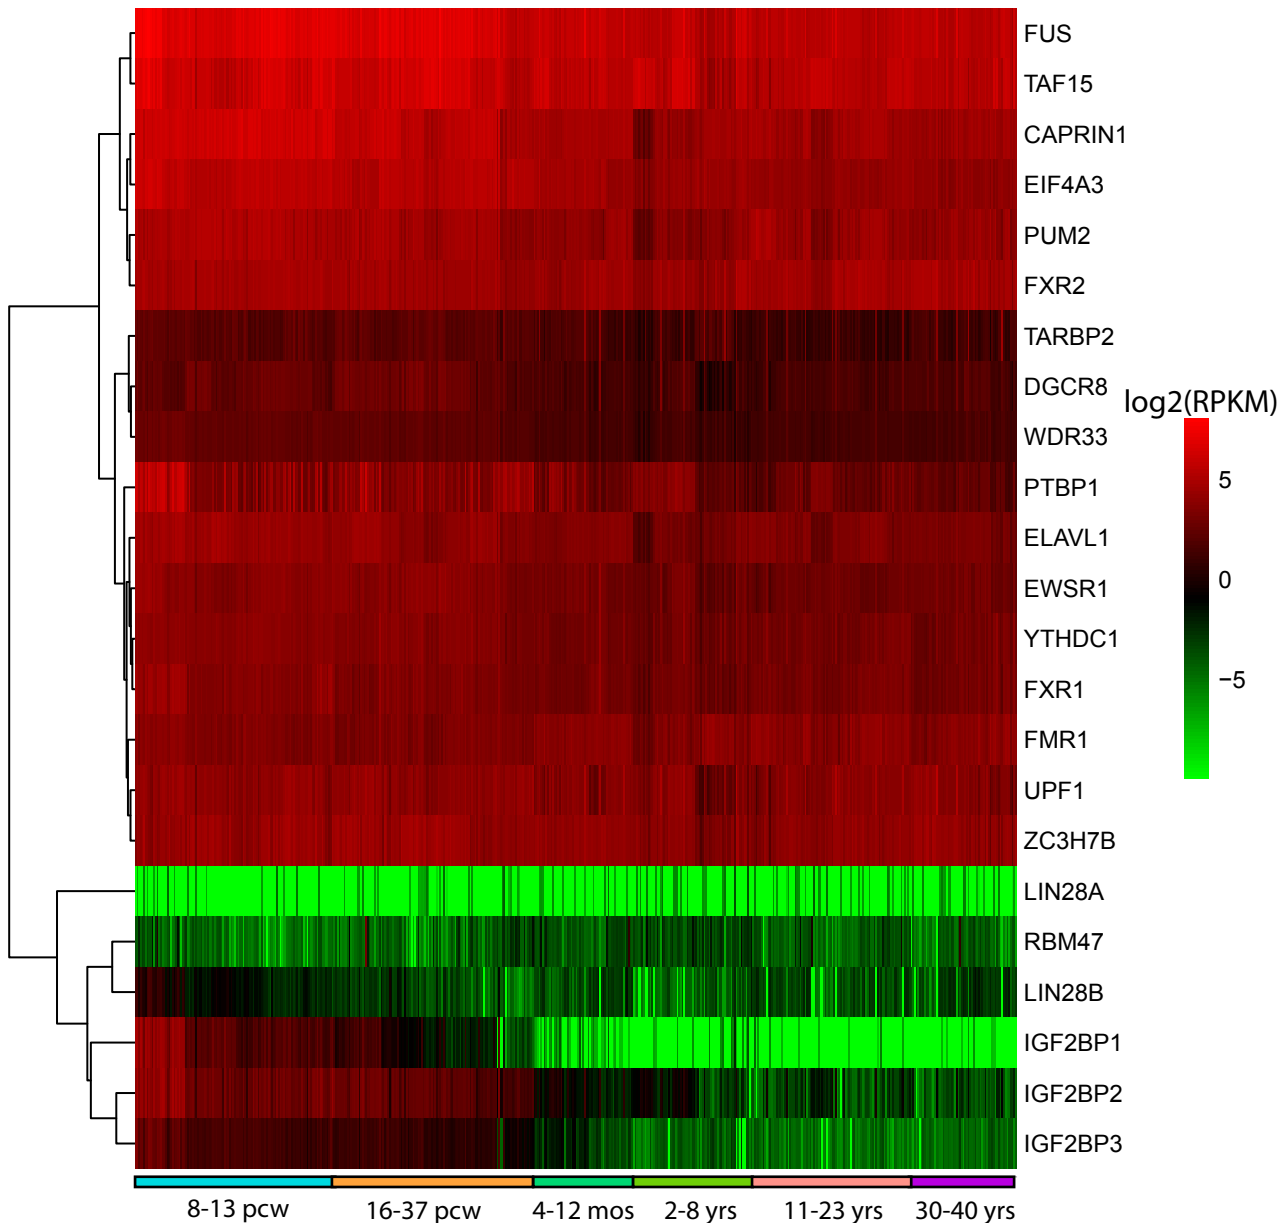

Source: https://www.biorxiv.org/content/10.1101/175844v3.full.pdf
