1 **Post-transcriptionally impaired *de novo* mutations**  
2 **contribute to the genetic etiology of four neuropsychiatric**  
3 **disorders**

4  
5 Fengbiao Mao<sup>1,2¶</sup>, Lu Wang<sup>3¶</sup>, Xiaolu Zhao<sup>2</sup>, Zhongshan Li<sup>4</sup>, Luoyuan Xiao<sup>5</sup>,  
6 Rajesh C. Rao<sup>2</sup>, Jinchen Li<sup>4</sup>, Huajing Teng<sup>1\*</sup>, Xin He<sup>6\*</sup>, and Zhong Sheng Sun<sup>1,4\*</sup>

7  
8 <sup>1</sup> Beijing Institutes of Life Science, Chinese Academy of Sciences, Beijing 100101,  
9 China.

10 <sup>2</sup> Department of Pathology, University of Michigan, Ann Arbor, MI 48109, USA.

11 <sup>3</sup> Institute of Life Science, Southeast University, Nanjing 210096, China.

12 <sup>4</sup> Institute of Genomic Medicine, Wenzhou Medical University, Wenzhou 325027,  
13 China

14 <sup>5</sup> Department of Computer Science and Technology, Tsinghua University, Beijing  
15 100084, China.

16 <sup>6</sup> Department of Human Genetics, University of Chicago, Chicago, IL, USA.

17  
18 ¶ These authors contributed equally to this work

19 \* Corresponding authors

20 E-mail:

21 [sunzs@biols.ac.cn](mailto:sunzs@biols.ac.cn) (Z.S.S.)

22 [xinhe@uchicago.edu](mailto:xinhe@uchicago.edu) (X.H.)

23 [tenghj@biols.ac.cn](mailto:tenghj@biols.ac.cn) (H.T.)

24

25

## 1 **Abstract**

2 While deleterious *de novo* mutations (DNMs) in coding region conferring risk in  
3 neuropsychiatric disorders have been revealed by next-generation sequencing, the  
4 role of DNMs involved in post-transcriptional regulation in pathogenesis of these  
5 disorders remains to be elucidated. Here, we identified 1,736 post-transcriptionally  
6 impaired DNMs (piDNMs), and prioritized 1,482 candidate genes in four  
7 neuropsychiatric disorders from 7,748 families. Our results revealed higher  
8 prevalence of piDNMs in the probands than in controls ( $P = 8.19 \times 10^{-17}$ ), and  
9 piDNM-harboring genes were enriched for epigenetic modifications and neuronal  
10 or synaptic functions. Moreover, we identified 86 piDNM-containing genes  
11 forming convergent co-expression modules and intensive protein-protein  
12 interactions in at least two neuropsychiatric disorders. These cross-disorder genes  
13 carrying piDNMs could form interaction network centered on RNA binding  
14 proteins, suggesting a shared post-transcriptional etiology underlying these  
15 disorders. Our findings illustrate the significant contribution of piDNMs to four  
16 neuropsychiatric disorders, and lay emphasis on combining functional and  
17 network-based evidences to identify regulatory causes of genetic disorders.

18

19

20

## 1 **Introduction**

2 Next-generation sequencing, which allows genome-wide detection of rare and de  
3 novo mutations (DNMs), is transforming the pace of genetics of human disease by  
4 identifying protein-coding mutations that confer risk <sup>1</sup>. Various computational  
5 methods have been developed to predict the effects of amino acid substitutions on  
6 protein function, and to classify corresponding mutations as deleterious or benign,  
7 based on evolutionary conservation or protein structural constraints <sup>2,3</sup>. Beside the  
8 effect on protein structure and function, genetic mutations involve in  
9 transcriptional processes <sup>4,5</sup> via direct or indirect effects on histone modifications <sup>6</sup>,  
10 and enhancers <sup>7</sup> to affect pathogenesis of diseases. However, the majorities of  
11 mutation are located in non-coding regions, and some of them have no relationship  
12 with transcriptional regulation, but can lead to an observable phenotype or disease  
13 <sup>8</sup>, suggesting the existence of another layer of regulatory effect of mutations. It has  
14 been revealed that single nucleotide variants can alter RNA structure, known as  
15 RiboSNitches, and depletion of RiboSNitches result in the alteration of specific  
16 RNA shapes at thousands of sites, including 3'untranslated region, binding sites of  
17 RBPs and microRNAs <sup>9</sup>. Thus, the mutations can impair post-transcriptional  
18 processes through disrupting the binding of micRNAs and RNA binding proteins  
19 (RBPs) <sup>10,11</sup>, resulting in various human diseases. For example, a variant in the 3'  
20 untranslated region of FMR1 decreases neuronal activity-dependent translation of  
21 FMRP by disrupting the binding of HuR, leading to developmental delay in  
22 patients <sup>10</sup>. Some attempts have been undertaken to better understand the  
23 interactions between mutations and binding of noncoding RNAs or RBPs.  
24 Maticzka *et al.* developed a machine learning-based approach to predict protein  
25 binding sites on RNA from crosslinking immunoprecipitation (CLIP) data using  
26 both RNA structure and sequence features <sup>12</sup>. Fukunaga *et al.* developed the CapR

1 algorithm based on the probability of secondary structure of an RNA for RBP  
2 binding<sup>13</sup>. However, identifying the network between single nucleotide mutations  
3 and post-transcriptional regulation remains challenging because of the complexity  
4 of the underlying interaction networks. Our and other's methods named RBP-Var<sup>14</sup>  
5 and POSTAR<sup>15</sup> represent initial efforts to systematically annotate post-  
6 transcriptional regulatory maps, which hold great promise for exploring the effect  
7 of single nucleotide mutations on post-transcriptional regulation in human diseases.

8 Increasing prevalence of neuropsychiatric disorders in children with unclear  
9 etiology has been reported during the past three decades<sup>16</sup>. Whole-exome  
10 sequencing of pediatric neuropsychiatric disorders uncovered the critical role of  
11 DNMs in the pathogenesis of these disorders<sup>1</sup>. However, previous studies of these  
12 disorders have focused on mutations in coding region<sup>1</sup>, cis-regulation<sup>17, 18</sup>,  
13 epigenome<sup>19</sup>, transcriptome<sup>20, 21</sup>, and proteome<sup>22</sup>, very few is known about the  
14 effect of DNMs on post-transcriptional regulation. Recently, more attentions have  
15 been paid on DNMs in regulatory elements and non-coding regions in  
16 neurodevelopmental disorders as it is indispensable to combine functional and  
17 evolutionary evidence to identify regulatory causes of genetic disorders<sup>23, 24</sup>. Most  
18 recently, a deep-learning-based framework illuminates involvement of noncoding  
19 DNMs in synaptic transmission and neuronal development in autism spectrum  
20 disorder<sup>25</sup>. Therefore, it is imperative to identify the post-transcriptionally  
21 regulation-disrupting DNMs related to pathology and clinical treatment of  
22 neuropsychiatric disorders.

23 To test whether post-transcriptionally regulation-disrupting DNMs contribute  
24 to the genetic architecture of psychiatric disorders, we collected whole exome  
25 sequencing data from 7,748 core families (5,677 families were parent-probands  
26 trios and 2,071 families were normal trios) and curated 9,519 *de novo* mutations

1 (6,996 DNMs in probands and 2,523 DNMs in controls) from four kinds of  
2 neuropsychiatric disorders, including autism spectrum disorder (ASD), epileptic  
3 encephalopathy (EE), intellectual disability (ID), schizophrenia (SCZ), as well as  
4 unaffected control subjects (Supplementary Table 1). By employing our newly  
5 updated workflow RBP-Var2 (Figure 1A, Supplementary Table 2) from our  
6 previously developed RBP-Var<sup>14</sup>, we investigated the potential impact of these *de*  
7 *novo* mutations involved in post-transcriptional regulation in these four  
8 neuropsychiatric disorders based on experimental data of genome-wide association  
9 studies (GWAS), expression quantitative trait locus (eQTL), CLIP-seq derived  
10 RBP binding sites, RNA editing and miRNA targets, and found that a subset of *de*  
11 *novo* mutations could be classified as post-transcriptionally impaired DNMs  
12 (piDNMs). These piDNMs showed significant enrichment in cases after correcting  
13 for multiple testing, and genes hit by these piDNMs were further analyzed for their  
14 properties and relative contribution to the etiology of neuropsychiatric disorders.

## 15 **Results**

### 16 **The frequency of piDNMs is much higher in probands than that in** 17 **controls**

18 To test whether specific subsets of regulatory DNMs contribute to the genetic  
19 architecture of neuropsychiatric disorders, we devised and updated the method,  
20 RBP-Var2 (<http://www.rbp-var.biols.ac.cn/>), based on experimental data of GWAS,  
21 eQTL, CLIP-seq derived RBP binding sites, RNA editing and miRNA targets.  
22 Subsequently, we used our updated workflow to identify functional piDNMs from  
23 5,677 trios with 6,996 DNMs across four neuropsychiatric disorders as well as  
24 2,071 unaffected controls with 2,523 DNMs (Supplementary Table 1). We  
25 determined DNMs with 1/2 category score predicted by RBP-Var2 as piDNMs

1 when considering their impact on RNA secondary structure, the binding of  
2 miRNAs and RBPs, and identified 1,736 piDNMs in probands (Supplementary  
3 Table 3), of which 17,7,7,6 and 1,699 were located in 3' UTRs, 5' UTRs, ncRNA  
4 exons, splicing sites and exons, respectively. In detail, RBP-Var2 identified 1,262  
5 piDNMs in ASD, 281 piDNMs in SCZ, 101 piDNMs in EE, 92 piDNMs in ID and  
6 354 piDNMs in healthy controls (Supplementary Table 3, 4). Interestingly, the  
7 frequency of piDNMs in the four neuropsychiatric disorders were significantly  
8 over-represented compared with those in controls (OR = 1.62,  $P = 8.19 \times 10^{-17}$ ,  
9 Table 1). We also observed that probands groups have much more abundant  
10 piDNMs compared with controls in four kinds of neuropsychiatric disorders  
11 (Figure 1B; Table 1). Dramatically, we found that synonymous piDNMs were  
12 significantly enriched in probands in contrast to those in controls ( $P=9.73 \times 10^{-4}$ ).  
13 While in the data set of original DNMs before the evaluated by RBP-Var2, the  
14 enrichment of the synonymous DNMs was not observed in cases, which is  
15 consistent with previous study<sup>1</sup>. To eliminate the effects of loss-of-function (LoF)  
16 mutations, we filtered out those LoF mutations from all piDNMs and found the  
17 non-LoF piDNMs also exhibited higher frequency in probands ( $P=2.36 \times 10^{-14}$ )  
18 (Table 1, Figure 1C; Supplementary Figure 1). Our analysis found a subset of  
19 DNMs, namely piDNMs, are enriched in probands and may contribute to the  
20 pathogenesis of these disorders although the rate of all de novo synonymous  
21 variants, which as a category, does not contribute significantly to risk for  
22 neurodevelopmental disorders.

## 23 **The piDNMs outperforms protein-disruptive DNMs in risk** 24 **prediction**

1 To investigate the accuracy and specificity of DNMs in different regulatory  
2 processes, we compared our tool with other three variant effect prediction tools,  
3 including SIFT<sup>25</sup>, PolyPhen2 (PPH2)<sup>26</sup> and RegulomeDB<sup>26</sup>. We found that the  
4 frequency of the stop gain DNMs is higher in cases than in controls determined by  
5 SIFT ( $P = 4.83 \times 10^{-2}$ ), and higher frequency of nonsynonymous DNMs was  
6 identified by PPH2 ( $P = 1.82 \times 10^{-2}$ ) (Figure 2A, B). However, RegulomeDB  
7 determined no significant higher frequency of functional DNMs in any functional  
8 category (Figure 2C) in cases versus controls. In contrast, RBP-Var2 could  
9 determine much more functional DNMs in the categories of frameshift ( $P =$   
10  $1.38 \times 10^{-3}$ ), nonsynonymous ( $P = 8.79 \times 10^{-15}$ ), stopgain ( $P = 6.42 \times 10^{-4}$ ) and  
11 synonymous ( $P = 7.30 \times 10^{-4}$ ) (Figure 2D). Then, we performed receiver operating  
12 characteristic (ROC) analysis to systemically evaluate the sensitivity and  
13 specificity of these four prediction methods. We found that area under curve (AUC)  
14 value of SIFT, PPH2, RBP-Var2 and RegulomeDB are 78.27%, 76.57%, 82.89%  
15 and 50.77%, respectively (Supplementary Figure 2), indicating that SIFT, PPH2,  
16 and RBP-Var2 is more sensitive and specific than that of RegulomeDB with  $P$   
17 value  $1.63 \times 10^{-10}$ ,  $2.40 \times 10^{-8}$  and  $2.51 \times 10^{-60}$ , respectively. In addition, the AUC  
18 value of RBP-Var2 is higher than that of SIFT and PPH2 with  $P$  value 0.049 and  
19 0.019, respectively. Intriguingly, RBP-Var2 could detect an additional 928 piDNMs  
20 covering 665 genes that were regarded as benign DNMs by other three methods,  
21 accounting for 25.27% of total 3,672 deleterious DNMs detected by all four tools  
22 (Supplementary Figure 3A, B). Especially, the non-LoF piDNMs detected by RBP-  
23 Var2 alone account for 52.8% of non-LoF piDNMs, while only 26.2% of non-LoF  
24 piDNMs were classified to be deleterious predicted by both SIFT and Polyphen2  
25 (Supplementary Figure 3C). The top three enriched gene ontology of these 665  
26 genes were intracellular signal transduction ( $P = 7.41 \times 10^{-6}$ ), organelle organization  
27 ( $P = 8.90 \times 10^{-6}$ ) and mitotic cell cycle ( $P = 2.06 \times 10^{-5}$ ) (Supplementary Figure 3D;

1 Supplementary Table 5), suggesting dysregulation involved in cell cycle and the  
2 impaired signal transduction may contribute to diverse neural damage, thereby  
3 trigger neurodevelopmental disorders<sup>27, 28</sup>. Therefore, the piDNMs detected by  
4 RBP-Var2 are distinct, and may play significant roles in the post-transcriptional  
5 processes of the development of neuropsychiatric disorders.

## 6 **Genes hit by piDNMs are shared across four** 7 **neuropsychiatric disorders**

8 Firstly, we identified 13 recurrent piDNMs, including seven piDNMs in ASD and  
9 six piDNMs in ID (Figure 3A). Secondly, we identified 149 genes carrying at least  
10 two piDNMs in all disorders, including 128 genes in ASD, three genes in EE, ten  
11 genes in ID and eight in SCZ. Among these 149 genes, we identified 21 high risk  
12 genes with  $P$  value  $< 1 \times 10^{-2}$  derived from our previously published TADA program  
13 (Transmission And De novo Association)<sup>29</sup> (Figure 3B). As our previous study  
14 using the NPdenovo database demonstrated that DNMs predicted as deleterious in  
15 the protein level are shared by four neuropsychiatric disorders<sup>30</sup>, we then wondered  
16 whether there were common piDNMs among four neuropsychiatric disorders. By  
17 comparing the genes harboring piDNMs across four disorders, we found 86 genes  
18 significantly shared by at least two disorders rather than random overlaps  
19 (permutation test,  $P < 1.00 \times 10^{-5}$  based on random resampling, Figure 3C, D).  
20 Similar results have been observed for the overlap between the cross-disorder  
21 genes of any two/three disorders and the genes in control, as well as for the  
22 overlapping genes between each disorder and the control (Supplementary Figure  
23 4B-O). In addition, the numbers of shared genes for any pairwise comparison or  
24 any three disorders are all significantly higher than randomly expected except for  
25 the comparison of EE versus SCZ ( $P=0.4964$ ) (Supplementary Figure5). Our



1 observation revealed the existence of common genes harboring piDNMs among  
2 these four neuropsychiatric disorders.

### 3 **Genes harboring piDNMs are involved in epigenetic** 4 **modification and synaptic functions**

5 The phenomenon of shared genes among the four neuropsychiatric disorders  
6 suggest there may exist common molecular mechanisms underlying their  
7 pathogenesis. Thus, we performed functional enrichment analysis for these shared  
8 genes, and found they were remarkably enriched in biological processes in  
9 chromatin modification like histone methylation, functional classifications of  
10 neuromuscular control and protein localization to synapse (Supplementary Table 5,  
11 Supplementary Figure 6). These epigenetic regulating genes are composed of  
12 CHD5, DOT1L, JARID2, MECP2, PHF19, PRDM4 and TNRC18 (Supplementary  
13 Table 6). Moreover, most of these epigenetic modification genes, have been  
14 previously linked with neuropsychiatric disorders<sup>31-35</sup>. Interestingly, shared genes  
15 in enrichment analyses have intensive linkages among these significant pathways  
16 as some of piDNM-containing genes could play roles in more than one of these  
17 pathways (Supplementary Figure 7).

18 Next, to investigate the biological pathways involved in each group of  
19 disorder-specific genes with piDNMs, we carried out functional enrichment  
20 analysis with terms in biological process (Supplementary Table 7-9). The top three  
21 enriched categories of ASD-specific genes were “macromolecule modification” ( $P$   
22 =  $2.90 \times 10^{-13}$ ), “organelle organization” ( $P = 1.22 \times 10^{-11}$ ) and “cell cycle” ( $P =$   
23  $1.17 \times 10^{-9}$ ). With respect to genes specific to SCZ, it is actually no surprise that the  
24 significantly enriched categories are related to protein localization and calcium  
25 transport, which have been revealed to be involved in the pathophysiology of

1 schizophrenia<sup>36</sup>. Because of the limited number of genes, only two GO terms were  
2 enriched for EE-specific genes, which were “N-glycan processing” ( $P = 3.65 \times 10^{-5}$ )  
3 and “protein deglycosylation” ( $P = 2.17 \times 10^{-4}$ ), while no terms were statistically  
4 enriched for ID-specific genes. Our observation that each group of disorder-  
5 specific genes being overrepresented into different biological pathways, suggests  
6 that piDNMs may also play a role in the distinct phenotypes of the four psychiatric  
7 disorders although the explicit underlying mechanisms need to be further explored.

## 8 **Co-expression modules are convergent for cross-disorder** 9 **genes hit by piDNMs**

10 Co-expression of genes can be used to explore the common and distinct molecular  
11 mechanisms in neuropsychiatric disorders<sup>37</sup>. Thus, we performed weighted gene  
12 co-expression network analysis (WGCNA)<sup>38</sup> for the 86 cross-disorder piDNMs-  
13 containing genes based on gene expression in 16 human brain structures across 31  
14 developmental stages from BrainSpan developmental transcriptome ( $n=524$ )<sup>39</sup>. The  
15 results of WGCNA deciphered two gene modules with distinct spatiotemporal  
16 expression patterns (Figure 4A, B; Supplementary Figure 8). The turquoise module  
17 ( $n=55$  genes) was characterized by high expression during early fetal development  
18 (8-24 postconceptional weeks) in the majority of brain structures (Figure 4C).  
19 Whereas, the blue module ( $n=22$  genes) showed low expression in early fetal  
20 development (8-38 postconceptional weeks) in the majority of brain structures  
21 (Figure 4D). It is also crucial to clarify gene expression of these genes in early  
22 development stages since altered epigenetic regulation in early development has  
23 been shown to be associated with neurodevelopmental disorders<sup>40</sup>. We found most  
24 of these 86 genes are highly expressed and may be required for the normal  
25 development of human embryo (Figure 4E, Supplementary Table 10). Our

1 observation indicates that these cross-disorder piDNMs-containing genes may play  
2 important roles in not only early brain developmental but also early embryonic  
3 development.

## 4 **Protein-protein interactions are intensive for cross-disorder** 5 **piDNM-containing proteins**

6 The co-expression results indicate that the proteins coded by the 86 cross-disorder  
7 genes may have intensive protein-protein interactions (PPIs). To identify common  
8 biological processes that potentially contribute to disease pathogenesis, we  
9 investigated protein-protein interactions within these 86 cross-disorder piDNM-  
10 containing genes. Our results revealed that 56 out of 86 (65.12%) cross-disorder  
11 genes represent an interconnected network on the level of direct/indirect protein-  
12 protein interaction relationships (Figure 5A; Supplementary Table 11).  
13 Furthermore, we determined several crucial hub piDNM-containing genes in the  
14 protein-protein interaction network, such as NOTCH1, MTOR, RYR2, and GNAS  
15 (Figure 5A), which may control common biological processes among these four  
16 neuropsychiatric disorders. Besides, these 86 cross-disorder proteins are indeed  
17 enriched in nervous system phenotypes, including abnormal synaptic transmission,  
18 abnormal nervous system development, abnormal neuron morphology and  
19 abnormal brain morphology, and behavior/neurological phenotype such as  
20 abnormal motor coordination/balance ( $P < 0.05$ , Supplementary Figure 9A).  
21 Similarly, these 56 genes in interaction network are enriched in nervous system  
22 phenotype including abnormal nervous system development and abnormal brain  
23 morphology ( $P < 0.05$ , Supplementary Figure 9B). By investigating the expression  
24 of these interacting genes in the human cortex of 12 ASD patients and 13 normal  
25 donators from public datasets of GSE64018<sup>41</sup> and GSE76852<sup>42</sup>, we identified 45

1 (80.35%) of these PPI genes were significantly differentially expressed between  
2 ASD patients and normal controls (Student's t-test,  $q < 0.05$ , Figure 5B). And 40  
3 (71.42%) of these PPI genes were up-regulated in ASD patients while three (5.35%)  
4 genes were down-regulated in ASD patients when compared with normal controls  
5 (Supplementary Table 12), indicating that the majority of these PPI genes were  
6 abnormally expressed in ASD patients compared with normal controls.

## 7 **Regulatory networks between RBPs and targeting genes are** 8 **potentially disrupted by piDNMs**

9 Dysregulation or mutations of RBPs can cause a range of developmental and  
10 neurological diseases<sup>43, 44</sup>. Meanwhile, mutations in RNA targets of RBPs, which  
11 could disturb the interactions between RBPs and their mRNA targets, and affect  
12 mRNA metabolism and protein homeostasis in neurons during the progression of  
13 neuropathological disorders<sup>45-47</sup>. Hence, we constructed a regulatory network  
14 between piDNMs and RBPs based on predicted binding sites of RBPs to  
15 investigate the genetic perturbations of mRNA-RBP interactions in the four  
16 disorders (Figure 6). We identified several crucial RBP hubs that may contribute to  
17 the pathogenesis of the four neuropsychiatric disorders, including EIF4A3, FMR1,  
18 PTBP1, AGO1/2, ELAVL1, IGF2BP1/3 and WDR33. Genes with piDNMs in  
19 different disorders could be regulated by the same RBP hub while one candidate  
20 gene may be regulated by different RBP hubs (Figure 6). In addition, all of these  
21 RBP hubs were highly expressed in early fetal development stages (8-37  
22 postconceptional weeks) based on BrainSpan developmental transcriptome  
23 (Supplementary Figure 10), suggesting their essential roles in the early stages of  
24 brain development.

## 25 **Discussion**

1 In contrasting with the recognized role of LoF DNMs in conferring risk for  
2 neuropsychiatric disorders, the effect of DNMs on post-transcriptional regulation  
3 in pathogenesis of these disorders remains unknown. In this study, we  
4 systematically analyzed the damaging effect of DNMs on post-transcriptional  
5 regulation in four neuropsychiatric disorders, and observed higher prevalence of  
6 piDNMs in probands than that in controls in four kinds of neuropsychiatric  
7 disorders.

8 To date, it has been a challenge to estimate the functions of synonymous and  
9 UTRs mutations though such mutations have been widely acknowledged to alter  
10 protein expression, conformation and function<sup>48</sup>. We applied RBP-Var2 algorithm  
11 to annotate and interpret *de novo* variants in subjects with four neuropsychiatric  
12 disorders based on their impact to RNA secondary structure, the binding of  
13 miRNAs and RBPs. In comparison with accuracy of other prediction algorithms  
14 such as SIFT, PPH2 or RegulomeDB, RBP-Var2 has highest accuracy (AUC:  
15 82.89%) to differentiate affected from the control subjects. Our RBP-Var2 tool  
16 identified 399 synonymous DNMs and 25 UTR's DNMs, which were extremely  
17 harmful in post-transcriptional regulation. Consistent with previous study<sup>49</sup>,  
18 synonymous damaging DNMs were significantly prominent in probands compared  
19 with that in controls. Meanwhile, *de novo* insertions and deletions (InDels),  
20 especially frameshift patterns are taken for granted to be deleterious. Indeed, *de*  
21 *novo* frameshift InDels are more frequent in neuropsychiatric disorders compared  
22 to non-frameshift InDels<sup>50</sup>, which were demonstrated by predictions of RBP-Var2  
23 but not SIFT or PPH2. Therefore, the updated version of RBP-Var2 will held great  
24 promise for exploring the effect of mutations on post-transcriptional regulation,  
25 and deciphering multiple biological layers of deleteriousness may improve the  
26 accuracy to predict disease related genetic variations.

1 Most interestingly, we found that some epigenetic pathways are enriched  
2 among these piDNM-containing genes, such as those that regulation of gene  
3 expression and histone modification. This finding is consistent with a previous  
4 report in which more than 68% of ASD cases shared a common acetylome  
5 aberrations at >5,000 cis-regulatory regions in prefrontal and temporal cortex <sup>51</sup>.  
6 Such common "epimutations" may be induced by either perturbations of epigenetic  
7 regulations, including post-transcriptional regulations due to mutations of  
8 substrates or the disruptions of epigenetic modifications resulting from the  
9 mutation of epigenetic genes. Our observations revealed the association of  
10 alterations of "epimutations" with dysregulation of post-transcription. This  
11 hypothesis is consistent with the observation that several recurrent piDNM-  
12 containing genes are non-epigenetic genes, including SYNGAP1, ADNP, POGZ  
13 and ANK2. Moreover, we discovered several recurrent epigenetic genes which  
14 contain piDNMs, including CHD8, EP300, KMT2A, KMT2C, KDM3B, JARID2  
15 and MECP2, and they may play important roles in the genome-wide aberrations of  
16 epigenetic landscapes through disruption of the post-transcriptional regulation.  
17 Furthermore, WGCNA analysis revealed that major hubs of the co-expression  
18 network for these 86 piDNM-containing genes were histone modifiers by using  
19 BrainSpan developmental transcriptome. These data indicate that piDNM-  
20 containing genes are co-expressed with genes frequently involved in epigenetic  
21 regulation of common cellular and biological process in neuropsychiatric disorders.  
22 Importantly, these 86 piDNM-containing genes harbor intensive protein-protein  
23 interactions in physics, and shared regulatory networks between piDNMs and  
24 RBPs in four neuropsychiatric disorders. We identified several RBP hubs of  
25 regulatory networks between piDNM-containing genes and RBP proteins,  
26 including EIF4A3, FMRP, PTBP1, AGO1/2, ELAVL1, IGF2BP1/3, WDR33 and  
27 FXR2. Taking FMRP for example, it is a well-known pathogenic gene of Fragile X

1 syndrome which co-occurs with autism in many cases and its targets are highly  
2 enriched for DNMs in ASD <sup>52</sup>. Our results demonstrated that, like the mutations on  
3 RBP hubs, mutations of RBP-targeting genes through disrupting their interactions  
4 with multiple RBPs may synergistically result in pathogenesis of multiple  
5 neuropsychiatric disorders.

6 Alterations in expression or mutations in either RBPs or their binding sites in  
7 target transcripts have been reported to cause several human diseases such as  
8 muscular atrophies, neurological disorders and cancer <sup>53</sup>. Although we identified  
9 1,736 piDNMs associated with neuropsychiatric disorders, the cause and explicit  
10 effects of these piDNMs in these disorders need to be further validated and  
11 explored. In this study, our method sheds light on evaluation of post-transcriptional  
12 impact of genetic mutations especially for synonymous mutations. Additionally, as  
13 small molecules can be rapidly designed to selectively target RNAs and affect  
14 RNA-RBP interactions <sup>54</sup>, our study provides new insights into RNA-based  
15 therapeutic strategies for the treatment of neuropsychiatric disorders.

## 1 **Materials and methods**

### 2 *Data collection and filtration*

3 For this study, 7,748 trios or quartets were recruited from previous whole exome  
4 sequencing (WES) studies (ref), comprising 5,677 parent-probands trios associated  
5 with four neuropsychiatric disorders and 2,071 control trios (Supplementary Table  
6 1). After removing the overlap of DNMs between probands and controls, a total of  
7 6,996 DNMs in probands and 2,523 DNMs in controls were identified for  
8 subsequent analysis.

### 9 *RBP-Var2 algorithm*

10 To better interpret the catalog of DNMs, we developed a new heuristic scoring  
11 system according to the functional confidence of variants based on experimental  
12 data of GWAS, eQTL, CLIP-seq derived RBP binding sites, RNA editing and  
13 miRNA targets, and machine learning algorithms. The scoring system represents  
14 with increasing confidence if a variant lies in more functional elements<sup>14</sup>. For  
15 example, we consider variants that are known eQTLs as significant and label them  
16 as category 1. Within category 1, subcategories indicate additional annotations  
17 ranging from the most informational variants (1a, variant may change the motif for  
18 RBP binding) to the least informational variants (1e, variant only has a motif for  
19 RBP binding). In mathematical algorithms, we employed LS-GKM<sup>55</sup> (10-mer) and  
20 deltaSVM<sup>56</sup> to predict the impact of DNMs on the binding of specific RBPs by  
21 calculating the delta SVM scores. Moreover, for single-base mutations, we  
22 employed the RNAsnp<sup>57</sup> with default parameters to estimate the mutation effects  
23 on local RNA secondary structure and calculated the empirical  $P$  values based on  
24 the base pair probabilities of the wild-type and mutant RNA sequences. For  
25 insertions and deletions, we evaluated the effects of DNMs on RNA secondary



1 structure using the minimal free energy generated by RNAfold<sup>58</sup> to calculate  
2 empirical  $P$  values based on cumulative probabilities of the Poisson distribution.  
3 Only the functional DNM produces  $>5$  change in gkm-SVM scores for the effect of  
4 RBP binding, and  $P$ -value  $< 0.1$  or free energy change  $>1$  for the effect of DNMs  
5 on RNA secondary structure change were determined to be a piDNM. Only DNMs  
6 occurred in exonic or UTR regions were included in our analysis.

### 7 ***Identification of piDNMs and comparison with variants predicted by*** 8 ***other methods***

9 To determine the likelihood of a functional mutation in post-transcriptional  
10 regulation for all SNVs and InDels, our newly updated program RBP-Var2 was  
11 utilized to assign an exclusive rank for each mutation and only those mutations  
12 categorized into rank 1 or 2 were considered as piDNMs. In comparison with those  
13 mutations involved in the disruption of gene function or transcriptional regulation,  
14 several programs such as SIFT, PolyPhen2 and RegulomeDB were used to analyze  
15 the same dataset of DNMs as the input for RBP-Var2. We only kept the mutations  
16 qualified as “damaging” from the result of SIFT and “possibly damaging” or  
17 “probably damaging” from PolyPhen2. In the case of RegulomeDB, mutations  
18 labeled as category 1 and 2 were retained. Next, we classified the type of mutation  
19 (frameshift, nonframeshift, nonsynonymous, synonymous, splicing and stop) and  
20 located regions (UTR3, UTR5, exonic, ncRNA exonic and splicing) to determine  
21 the distribution of piDNMs, genetic variants and other regulatory variants. The  
22 number of variants in cases versus controls was illustrated by bar chart (\*\*\*:  $P <$   
23  $0.001$ , \*\*:  $0.001 < P < 0.01$ , \*:  $0.01 < P < 0.05$ , binomial test).

### 24 ***TADA analysis of DNMs in four disorders***

1 Our previously published TADA program <sup>29</sup>, which predicts risk genes accurately  
2 on the basis of allele frequencies, gene-specific penetrance, and mutation rate, was  
3 used to calculate the  $P$  value for the likelihood of each gene contributing to the all  
4 four disorders with default parameters.

### 5 ***ROC curves and specificity/sensitivity estimation***

6 We screened a positive (non-neutral) test set of likely casual mutations in  
7 Mendelian disease from the ClinVar database (v20170130). From a total of  
8 237,308 mutations in ClinVar database, we picked up 145 exonic mutations  
9 presented in our curated DNMs in probands. Our negative (neutral) set of likely  
10 non-casual variants was built from DNMs of unaffected controls in four  
11 neuropsychiatric disorders. To exclude rare deleterious DNMs, we selected only  
12 DNMs in controls with a minor allele frequency of at least 0.01 in 1000 genome  
13 (1000g2014oct), and obtained a set of 921 exonic variants. Then, we employed R  
14 package pROC to analyze and compare ROC curves.

### 15 ***Permutation analysis for overlaps of genes with piDNMs***

16 In order to evaluate the overlap of genes among any two set of genes with piDNMs,  
17 we shuffled the intersections of genes and repeated this procedure 100,000 times.  
18 During each permutation, we randomly selected the same number of genes as the  
19 actual situation from the all RefSeq genes for each disorder taking account of gene-  
20 level de novo mutation rate, then  $P$  values were calculated as the proportion of  
21 permutations during which the simulated number of overlap was greater than or  
22 equal to the actual observed number.

### 23 ***Functional enrichment analysis***

24 A gene harboring piDNMs was selected into our candidate gene set to conduct  
25 functional enrichment analysis if it occurred in at least two of the four disorders.

1 GO (Gene Ontology) and KEGG (Kyoto Encyclopedia of Genes and Genomes)  
2 pathway enrichments analyses were implemented by Cytoscape (version 3.4.0)  
3 plugin ClueGO (version 2.3.0) using genome-wide coding genes as background  
4 and  $P$  values calculated by hypergeometric test were corrected to be  $q$  values by  
5 Benjamini–Hochberg procedure for reducing the false discovery rate resulted from  
6 multiple hypothesis testing.

### 7 ***Co-expression and spatiotemporal specificity***

8 Normalized gene-expression of 16 human brain regions were determined by RNA  
9 sequencing and obtained from database BrainSpan (<http://www.brainspan.org>). We  
10 extracted expression for 77 out of 86 extreme damaging cross-disorder genes and  
11 employed R-package WGCNA (weighted correlation network analysis) with a  
12 power of five to cluster the spatiotemporal-expression patterns and prenatal  
13 laminar-expression profiles. The expression level for each gene and development  
14 stage (only stages with expression data for all 16 structures were selected,  $n = 14$ )  
15 was presented across all brain regions.

### 16 ***Protein-protein interaction network of cross-disorder genes***

17 Protein-protein interactions data of Homo sapiens was collected from the STRING  
18 (v10.5) database with score over 0.8. For the PPI network of all cross-disorder  
19 genes, we only retain the proteins with at least two links. Those nodes with degree  
20 over 30 in the network were considered as hubs. Cytoscape (version3.4.0) was  
21 used to analyze and visualize protein-protein interaction networks.  
22 Overrepresentation of mouse-mutant phenotypes was evaluated by the web tool  
23 MamPhea for the genes in the PPI network and for all cross-disorder genes  
24 containing piDNMs. The rest of genome was used as background and multiple test  
25 adjustment for  $P$  values was done by Benjamini-Hochberg method.

## 1 ***Gene-RBP interaction network***

2 Cytoscape (version 3.4.0) was utilized for visualization of the associations between  
3 genes harboring piDNMs in the four neuropsychiatric disorders and the  
4 corresponding regulatory RBPs.

## 5 **The available data resources**

6 To make our findings easily accessible to the research community, we have  
7 developed RBP-Var2 platform (<http://www.rbp-var.biols.ac.cn/>) for storage and  
8 retrieval of piDNMs, candidate genes, and for exploring the genetic etiology of  
9 neuropsychiatric disorders in post-transcriptional regulation. The expression and  
10 epigenetic profiles of genes related to regulatory *de novo* mutations and early  
11 embryonic development have been deposited in our previously published database  
12 EpiDenovo (<http://www.epidenovo.biols.ac.cn/>)<sup>40</sup>.

### 13 **URLs**

14 RBP-Var2, <http://www.rbp-var.biols.ac.cn/>; NPdenovo,  
15 <http://www.wzgenomics.cn/NPdenovo/index.php>; EpiDenovo:  
16 <http://www.epidenovo.biols.ac.cn/>; BioGRID, <https://thebiogrid.org/>;  
17 MamPhea , <http://evol.nhri.org.tw/phenome/index.jsp?platform>; BrainSpan,  
18 <http://www.brainspan.org>; ClinVar, <https://www.ncbi.nlm.nih.gov/clinvar/>;  
19 1000Genomes, <http://www.internationalgenome.org/>; WGCNA,  
20 <https://labs.genetics.ucla.edu/horvath/CoexpressionNetwork/Rpackages/WGCNA/>;  
21 esyN, <http://www.esyn.org/>; Cytoscape, <http://www.cytoscape.org/>; TADA,  
22 [http://wpicr.wpic.pitt.edu/WPICCompGen/TADA/TADA\\_homepage.htm](http://wpicr.wpic.pitt.edu/WPICCompGen/TADA/TADA_homepage.htm); ClueGO,  
23 <http://apps.cytoscape.org/apps/cluego>; pROC, <http://web.expasy.org/pROC/>; R,  
24 <https://www.r-project.org/>; Perl, <https://www.perl.org/>.

## 1 **Contributions**

2 F.M. and L.W. participated in the design and execution of analyses, produced the  
3 figures, participated in the interpretation of results and edited the manuscript. F.M.  
4 developed computational code employed in the analyses. L.W. and Z.L. developed  
5 the statistical framework and drew the figures. X.Z. participated in the  
6 interpretation of results, the oversight of analyses. L.X. developed and improved  
7 the online platform of RBP-Var2. H.T. and R.C.R. provided professional guidance  
8 in the writing and refining of the manuscript. J.L. and H. T. collected the DNMs  
9 from literature and database. Z.S.S. and X.H. conceived the study, participated in  
10 the design of analyses, oversaw the study and the interpretation of results, and  
11 drafted and edited the manuscript.

## 12 **Acknowledgments**

13 The project was funded by National Key R&D Program of China (No.  
14 2016YFC0900400). We thank Kun Zhang for his help in TADA analysis and thank  
15 Leisheng Shi for his help in data analysis.

## 16 **Competing interests**

17 The authors declare no competing financial interests.

## 18 **Figure legends**

19 **Figure 1.** The abundance of piDNMs in different disease categories. (A) Schematic  
20 overview of the RBP-Var2 algorithm. (B) The bar plot corresponds to the odds  
21 ratios indicating the enrichment of piDNMs in patients from each of the four  
22 neuropsychiatric disorders. (C) The relative amount of LoF and non-LoF piDNMs  
23 in five neuropsychiatric disorders.

1 **Figure 2.** Performance comparison of the ability to distinguish severe DNMs  
2 between RBP-Var2 and three other tools. (A) Different kinds of DNMs affecting  
3 protein function predicted by SIFT. The Y-axis corresponds to the proportion of  
4 each kind of mutations within the total number of damaging DNMs predicted by  
5 SIFT. (B) Different kinds of DNMs that affect protein function predicted by  
6 PolyPhen2. The Y-axis corresponds to the proportion of each kind of mutations  
7 within the total number of damaging DNMs predicted by PolyPhen2. (C) The  
8 DNMs, predicted as functional elements involved in transcriptional regulation by  
9 RegulomeDB, are categorized into different functional types. The Y-axis  
10 corresponds to the proportion of each kind of mutations within the total number of  
11 damaging DNMs predicted by RegulomeDB. (D) The DNMs classified as either  
12 level 1 or 2 (piDNMs) are categorized into different functional types. The Y-axis  
13 corresponds to the proportion of each kind of mutations within the total number of  
14 damaging piDNMs. The *P* values were measured by two-sided binomial test.  
15 DNMs predicted in both cases and controls are excluded in the comparison and the  
16 DNMs labeled as “unknown” are not demonstrated in the bar plot.

17 **Figure 3.** Genes with piDNMs involved in four neuropsychiatric disorders. (A)  
18 Scatter plot of eight genes harboring recurrent piDNMs among 1,736 piDNMs.  
19 The Y-axis corresponds to the  $-\log_{10}(P \text{ value})$  calculated by TADA. The X-axis  
20 stands for the TADA output of  $-\log_{10}(\text{mutation rate})$ . (B) Scatter plot of 21  
21 recurrent genes with  $p < 0.01$  by TADA. The Y-axis corresponds to the  $-\log_{10}(P$   
22  $\text{value})$  calculated by TADA. The X-axis stands for the TADA output of  $-$   
23  $\log_{10}(\text{mutation rate})$ . (C) Venn diagram representing the distribution of candidate  
24 genes shared among the four neuropsychiatric disorders. (D) Permutation test for  
25 the randomness of the overlap between the 86 cross-disorder genes. We shuffled  
26 the genes of each disorder and calculated the shared genes between the four

1 disorders, and repeated this procedure for 100,000 times to get the null distribution.  
2 The vertical dash line indicates the observed value.

3 **Figure 4.** Weighted co-expression analysis of 86 shared genes. (A) Heatmap  
4 visualization of the co-expression network of 86 shared genes. The more saturated  
5 color corresponds to the more highly expressed genes. (B) Hierarchical clustering  
6 dendrogram of the two color-coded gene modules displayed in (A). (C, D) The two  
7 spatiotemporal expression patterns (Turquoise module and Blue module) for  
8 network genes based on RNA-seq data from BrainSpan, and they correspond to 17  
9 developmental stages across 16 subregions: A1C, primary auditory cortex; AMY,  
10 amygdaloid complex; CBC, cerebellar cortex; DFC, dorsolateral prefrontal cortex;  
11 HIP, hippocampus; IPC, posteroinferior parietal cortex; ITC, inferolateral temporal  
12 cortex; M1C, primary motor cortex; MD, mediodorsal nucleus of thalamus; MFC,  
13 anterior cingulate cortex; OFC, orbital frontal cortex; STC, posterior superior  
14 temporal cortex; STR, striatum; S1C, primary somatosensory cortex; V1C, primary  
15 visual cortex; VFC, ventrolateral prefrontal cortex.

16 **Figure 5.** Protein-protein interaction network of the cross-disorder genes. The  
17 network of interactions between pairs of the proteins encoded by the 56 out of 86  
18 cross-disorder genes.

19 **Figure 6.** Interaction network of RBPs and genes with piDNMs. Different roles of  
20 the nodes are reflected by distinguishable geometric shapes and colors. The  
21 magenta vertical arrow stands for the RNA binding proteins. Disks with different  
22 colors represent the genes with piDNMs involved in different kinds of disorders.

23 **Supplementary Figure 1.** Excess of piDNMs in probands. The odds ratio of  
24 synonymous DNMs and piDNMs were analyzed. The dominance of filtered  
25 piDNMs that not contained LoF mutations were also displayed.

1 **Supplementary Figure 2.** ROC curve showing the performance of the predictions  
2 of SIFT, PPH2, RBP-Var2 and RegulomeDB.

3 **Supplementary Figure 3.** Overlap of DNMs identified by different tools. (A)  
4 Venn diagram depicting the overlap between the DNMs predicted by SIFT, PPH2,  
5 RBP-Var2 and RegulomeDB. (B) Venn diagram depicting the overlap between the  
6 genes predicted by SIFT, PPH2, RBP-Var2 and RegulomeDB. (C) The pie chart  
7 shows the distribution of all non-LoF piDNMs. The non-LoF piDNMs detected by  
8 RBP-Var2 alone account for 52.8% of all non-LoF piDNMs (pink), while the non-  
9 LoF deleterious DNMs identified by both SIFT and Polyphen2 take up 26.2% of  
10 all (light purple). (D) Pathway enrichment analysis of the 665 genes unique to the  
11 prediction of RBP-Var2.

12 **Supplementary Figure 4.** Permutation test of the randomness of the overlap of  
13 different set of disease genes with control. (A-K) Permutation test for the validity  
14 of the gene overlap between the cross-disorder genes and the control. (L-O)  
15 Permutation for the overlap of genes from each disorder with control. We shuffled  
16 the genes of each disorder and calculated the shared genes between each pair, and  
17 repeated this procedure for 100,000 times to get the null distribution. The vertical  
18 dash line stands for the observed value.

19 **Supplementary Figure 5.** Test of the significance of the number of cross-disorder  
20 genes involved in the four neuropsychiatric disorders. (A-J) Permutation test for  
21 the validity of the gene overlap among/between every combination of three/two  
22 disorders.

23 **Supplementary Figure 6.** Pie chart of the pathway enrichment analysis for the 86  
24 cross-disorder genes.



- 1 **Supplementary Figure 7.** Interaction network of the gene enrichment analysis for  
2 the 86 cross-disorder genes.
- 3 **Supplementary Figure 8.** Relationship between Co-expression modules. (A)  
4 MDS plot of genes in turquoise module and blue module. (B) Relationship  
5 between module eigengenes. (C) Clustering tree based of the module eigengenes.  
6 (D) heatmap of adjacency Eigengene.
- 7 **Supplementary Figure 9.** Mammalian phenotype enrichment analysis of selected  
8 genes. (A) Mammalian phenotype enrichment of 86 cross-disorder piDNMs genes.  
9 (B) Mammalian phenotype enrichment of 56 genes in interaction network.
- 10 **Supplementary Figure 10.** Heat map of the expression of the crucial RBP hub  
11 genes during the early fetal development stages.

12

## 1 Reference

- 2 1. Iossifov I, O'Roak BJ, Sanders SJ, Ronemus M, Krumm N, Levy D *et al.* The contribution of de  
3 novo coding mutations to autism spectrum disorder. *Nature* 2014; **515**(7526): 216-221.
- 4
- 5 2. Pires DE, Ascher DB, Blundell TL. DUET: a server for predicting effects of mutations on protein  
6 stability using an integrated computational approach. *Nucleic Acids Res* 2014; **42**(Web Server  
7 issue): W314-319.
- 8
- 9 3. Adzhubei IA, Schmidt S, Peshkin L, Ramensky VE, Gerasimova A, Bork P *et al.* A method and  
10 server for predicting damaging missense mutations. *Nature Methods* 2010; **7**(4): 248-249.
- 11
- 12 4. Chen XF, Zhang YW, Xu HX, Bu GJ. Transcriptional regulation and its misregulation in Alzheimer's  
13 disease. *Molecular Brain* 2013; **6**.
- 14
- 15 5. Lee TI, Young RA. Transcriptional Regulation and Its Misregulation in Disease. *Cell* 2013; **152**(6):  
16 1237-1251.
- 17
- 18 6. Portela A, Esteller M. Epigenetic modifications and human disease. *Nature Biotechnology* 2010;  
19 **28**(10): 1057-1068.
- 20
- 21 7. Sakabe NJ, Savic D, Nobrega MA. Transcriptional enhancers in development and disease.  
22 *Genome Biology* 2012; **13**(1).
- 23
- 24 8. Boyle AP, Hong EL, Hariharan M, Cheng Y, Schaub MA, Kasowski M *et al.* Annotation of functional  
25 variation in personal genomes using RegulomeDB. *Genome Res* 2012; **22**(9): 1790-1797.
- 26
- 27 9. Wan Y, Qu K, Zhang QC, Flynn RA, Manor O, Ouyang Z *et al.* Landscape and variation of RNA  
28 secondary structure across the human transcriptome. *Nature* 2014; **505**(7485): 706-709.
- 29
- 30 10. Suhl JA, Muddashetty RS, Anderson BR, Ifrim MF, Visootsak J, Bassell GJ *et al.* A 3' untranslated  
31 region variant in FMR1 eliminates neuronal activity-dependent translation of FMRP by disrupting  
32 binding of the RNA-binding protein HuR. *Proc Natl Acad Sci U S A* 2015; **112**(47): E6553-6561.
- 33
- 34 11. Chin LJ, Ratner E, Leng S, Zhai R, Nallur S, Babar I *et al.* A SNP in a let-7 microRNA  
35 complementary site in the KRAS 3' untranslated region increases non-small cell lung cancer risk.  
36 *Cancer Res* 2008; **68**(20): 8535-8540.
- 37
- 38 12. Maticzka D, Lange SJ, Costa F, Backofen R. GraphProt: modeling binding preferences of RNA-  
39 binding proteins. *Genome Biol* 2014; **15**(1): R17.

- 1  
2 13. Fukunaga T, Ozaki H, Terai G, Asai K, Iwasaki W, Kiryu H. CapR: revealing structural specificities of  
3 RNA-binding protein target recognition using CLIP-seq data. *Genome Biol* 2014; **15**(1): R16.
- 4  
5 14. Mao FB, Xiao LY, Li XF, Liang JL, Teng HJ, Cai WS *et al.* RBP-Var: a database of functional variants  
6 involved in regulation mediated by RNA-binding proteins. *Nucleic Acids Research* 2016; **44**(D1):  
7 D154-D163.
- 8  
9 15. Hu B, Yang Y-CT, Huang Y, Zhu Y, Lu ZJ. POSTAR: a platform for exploring post-transcriptional  
10 regulation coordinated by RNA-binding proteins. *Nucleic Acids Research* 2016: gkw888.
- 11  
12 16. Elsabbagh M, Divan G, Koh YJ, Kim YS, Kauchali S, Marcin C *et al.* Global Prevalence of Autism  
13 and Other Pervasive Developmental Disorders. *Autism Research* 2012; **5**(3): 160-179.
- 14  
15 17. Gamazon ER, Badner JA, Cheng L, Zhang C, Zhang D, Cox NJ *et al.* Enrichment of cis-regulatory  
16 gene expression SNPs and methylation quantitative trait loci among bipolar disorder  
17 susceptibility variants. *Molecular Psychiatry* 2013; **18**(3): 340-346.
- 18  
19 18. Bonder MJ, Luijk R, Zhernakova DV, Moed M, Deelen P, Vermaat M *et al.* Disease variants alter  
20 transcription factor levels and methylation of their binding sites. *Nat Genet* 2016.
- 21  
22 19. Loke YJ, Hannan AJ, Craig JM. The Role of Epigenetic Change in Autism Spectrum Disorders. *Front*  
23 *Neurol* 2015; **6**: 107.
- 24  
25 20. Gupta S, Ellis SE, Ashar FN, Moes A, Bader JS, Zhan J *et al.* Transcriptome analysis reveals  
26 dysregulation of innate immune response genes and neuronal activity-dependent genes in  
27 autism. *Nat Commun* 2014; **5**: 5748.
- 28  
29 21. Voineagu I, Wang X, Johnston P, Lowe JK, Tian Y, Horvath S *et al.* Transcriptomic analysis of  
30 autistic brain reveals convergent molecular pathology. *Nature* 2011; **474**(7351): 380-384.
- 31  
32 22. Corbett BA, Kantor AB, Schulman H, Walker WL, Lit L, Ashwood P *et al.* A proteomic study of  
33 serum from children with autism showing differential expression of apolipoproteins and  
34 complement proteins. *Mol Psychiatry* 2007; **12**(3): 292-306.
- 35  
36 23. Short PJ, McRae JF, Gallone G, Sifrim A, Won H, Geschwind DH *et al.* De novo mutations in  
37 regulatory elements in neurodevelopmental disorders. *Nature* 2018.
- 38  
39 24. Liu Y, Liang Y, Cicek AE, Li Z, Li J, Muhle RA *et al.* A Statistical Framework for Mapping Risk Genes  
40 from De Novo Mutations in Whole-Genome-Sequencing Studies. *The American Journal of*  
41 *Human Genetics* 2018.

- 1  
2 25. Zhou J, Park CY, Theesfeld CL, Wong AK, Yuan Y, Scheckel C *et al.* Whole-genome deep-learning  
3 analysis identifies contribution of noncoding mutations to autism risk. *Nat Genet* 2019; **51**(6):  
4 973-980.
- 5  
6 26. Boyle AP, Hong EL, Hariharan M, Cheng Y, Schaub MA, Kasowski M *et al.* Annotation of functional  
7 variation in personal genomes using RegulomeDB. *Genome Res* 2012; **22**(9): 1790-1797.
- 8  
9 27. Wang W, Bu B, Xie M, Zhang M, Yu Z, Tao D. Neural cell cycle dysregulation and central nervous  
10 system diseases. *Prog Neurobiol* 2009; **89**(1): 1-17.
- 11  
12 28. Lau CG, Zukin RS. NMDA receptor trafficking in synaptic plasticity and neuropsychiatric disorders.  
13 *Nat Rev Neurosci* 2007; **8**(6): 413-426.
- 14  
15 29. He X, Sanders SJ, Liu L, De Rubeis S, Lim ET, Sutcliffe JS *et al.* Integrated Model of De Novo and  
16 Inherited Genetic Variants Yields Greater Power to Identify Risk Genes. *Plos Genetics* 2013; **9**(8).
- 17  
18 30. Li JC, Cai T, Jiang Y, Chen HQ, He X, Chen C *et al.* Genes with de novo mutations are shared by  
19 four neuropsychiatric disorders discovered from NPdenovo database. *Molecular Psychiatry* 2016;  
20 **21**(2): 290-297.
- 21  
22 31. Brookes E, Shi Y. Diverse Epigenetic Mechanisms of Human Disease. *Annual Review of Genetics,*  
23 *Vol 48* 2014; **48**: 237-268.
- 24  
25 32. Peter CJ, Akbarian S. Balancing histone methylation activities in psychiatric disorders. *Trends in*  
26 *Molecular Medicine* 2011; **17**(7): 372-379.
- 27  
28 33. Egan CM, Nyman U, Skotte J, Streubel G, Turner S, O'Connell DJ *et al.* CHD5 Is Required for  
29 Neurogenesis and Has a Dual Role in Facilitating Gene Expression and Polycomb Gene  
30 Repression. *Developmental Cell* 2013; **26**(3): 223-236.
- 31  
32 34. Dubey N, Hoffman JF, Schuebel K, Yuan Q, Martinez PE, Nieman LK *et al.* The ESC/E(Z) complex,  
33 an effector of response to ovarian steroids, manifests an intrinsic difference in cells from women  
34 with premenstrual dysphoric disorder. *Mol Psychiatry* 2017; **22**(8): 1172-1184.
- 35  
36 35. Chittka A, Nitarska J, Grazini U, Richardson WD. Transcription factor positive regulatory domain 4  
37 (PRDM4) recruits protein arginine methyltransferase 5 (PRMT5) to mediate histone arginine  
38 methylation and control neural stem cell proliferation and differentiation. *J Biol Chem* 2012;  
39 **287**(51): 42995-43006.

40

- 1 36. Wang H, Westin L, Nong Y, Birnbaum S, Bendor J, Brismar H *et al.* Norbin Is an Endogenous  
2 Regulator of Metabotropic Glutamate Receptor 5 Signaling. *Science* 2009; **326**(5959): 1554-1557.  
3  
4 37. Lotan A, Fenckova M, Bralten J, Alttou A, Dixon L, Williams RW *et al.* Neuroinformatic analyses  
5 of common and distinct genetic components associated with major neuropsychiatric disorders.  
6 *Frontiers in Neuroscience* 2014; **8**.  
7  
8 38. Langfelder P, Horvath S. WGCNA: an R package for weighted correlation network analysis. *Bmc*  
9 *Bioinformatics* 2008; **9**.  
10  
11 39. Kang HJ, Kawasawa YI, Cheng F, Zhu Y, Xu X, Li M *et al.* Spatio-temporal transcriptome of the  
12 human brain. *Nature* 2011; **478**(7370): 483-489.  
13  
14 40. Mao F, Liu Q, Zhao X, Yang H, Guo S, Xiao L *et al.* EpiDenovo: a platform for linking regulatory de  
15 novo mutations to developmental epigenetics and diseases. *Nucleic Acids Res* 2017.  
16  
17 41. Irimia M, Weatheritt RJ, Ellis JD, Parikshak NN, Gonatopoulos-Pournatzis T, Babor M *et al.* A  
18 Highly Conserved Program of Neuronal Microexons Is Misregulated in Autistic Brains. *Cell* 2014;  
19 **159**(7): 1511-1523.  
20  
21 42. Werling DM, Parikshak NN, Geschwind DH. Gene expression in human brain implicates sexually  
22 dimorphic pathways in autism spectrum disorders. *Nature Communications* 2016; **7**.  
23  
24 43. Castello A, Fischer B, Hentze MW, Preiss T. RNA-binding proteins in Mendelian disease. *Trends in*  
25 *Genetics* 2013; **29**(5): 318-327.  
26  
27 44. Klein ME, Monday H, Jordan BA. Proteostasis and RNA Binding Proteins in Synaptic Plasticity and  
28 in the Pathogenesis of Neuropsychiatric Disorders. *Neural Plasticity* 2016.  
29  
30 45. Lukong KE, Chang KW, Khandjian EW, Richard S. RNA-binding proteins in human genetic disease.  
31 *Trends in Genetics* 2008; **24**(8): 416-425.  
32  
33 46. Gerstberger S, Hafner M, Tuschl T. A census of human RNA-binding proteins. *Nature Reviews*  
34 *Genetics* 2014; **15**(12): 829-845.  
35  
36 47. Neelamraju Y, Hashemikhabir S, Janga SC. The human RBPome: From genes and proteins to  
37 human disease. *Journal of Proteomics* 2015; **127**: 61-70.  
38  
39 48. Sauna ZE, Kimchi-Sarfaty C. Understanding the contribution of synonymous mutations to human  
40 disease. *Nature Reviews Genetics* 2011; **12**(10): 683-691.

- 1  
2 49. Takata A, Ionita-Laza I, Gogos JA, Xu B, Karayiorgou M. De Novo Synonymous Mutations in  
3 Regulatory Elements Contribute to the Genetic Etiology of Autism and Schizophrenia. *Neuron*  
4 2016; **89**(5): 940-947.
- 5  
6 50. Kosmicki JA, Samocha KE, Howrigan DP, Sanders SJ, Slowikowski K, Lek M *et al.* Refining the role  
7 of de novo protein-truncating variants in neurodevelopmental disorders by using population  
8 reference samples. *Nat Genet* 2017.
- 9  
10 51. Sun W, Poschmann J, Cruz-Herrera Del Rosario R, Parikshak NN, Hajan HS, Kumar V *et al.* Histone  
11 Acetylome-wide Association Study of Autism Spectrum Disorder. *Cell* 2016; **167**(5): 1385-1397  
12 e1311.
- 13  
14 52. Parikshak NN, Gandal MJ, Geschwind DH. Systems biology and gene networks in  
15 neurodevelopmental and neurodegenerative disorders. *Nature Reviews Genetics* 2015; **16**(8):  
16 441-458.
- 17  
18 53. Kechavarzi B, Janga SC. Dissecting the expression landscape of RNA-binding proteins in human  
19 cancers. *Genome Biology* 2014; **15**(1).
- 20  
21 54. Costales MG, Haga CL, Velagapudi SP, Childs-Disney JL, Phinney DG, Disney MD. Small Molecule  
22 Inhibition of microRNA-210 Reprograms an Oncogenic Hypoxic Circuit. *J Am Chem Soc* 2017;  
23 **139**(9): 3446-3455.
- 24  
25 55. Lee D. LS-GKM: a new gkm-SVM for large-scale datasets. *Bioinformatics* 2016; **32**(14): 2196-2198.
- 26  
27 56. Lee D, Gorkin DU, Baker M, Strober BJ, Asoni AL, McCallion AS *et al.* A method to predict the  
28 impact of regulatory variants from DNA sequence. *Nature Genetics* 2015; **47**(8): 955-+.
- 29  
30 57. Sabarinathan R, Tafer H, Seemann SE, Hofacker IL, Stadler PF, Gorodkin J. RNAsnp: Efficient  
31 Detection of Local RNA Secondary Structure Changes Induced by SNPs (vol 34, pg 546, 2013).  
32 *Human Mutation* 2013; **34**(6): 925-925.
- 33  
34 58. Gruber AR, Lorenz R, Bernhart SH, Neubock R, Hofacker IL. The Vienna RNA Websuite. *Nucleic*  
35 *Acids Research* 2008; **36**: W70-W74.

36  
37

A

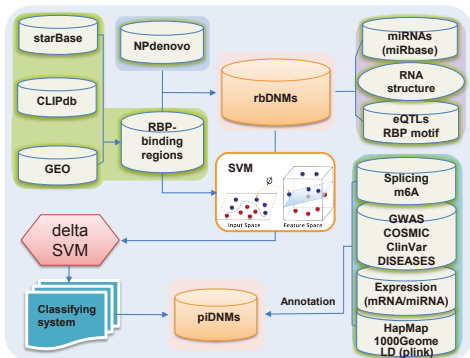

B

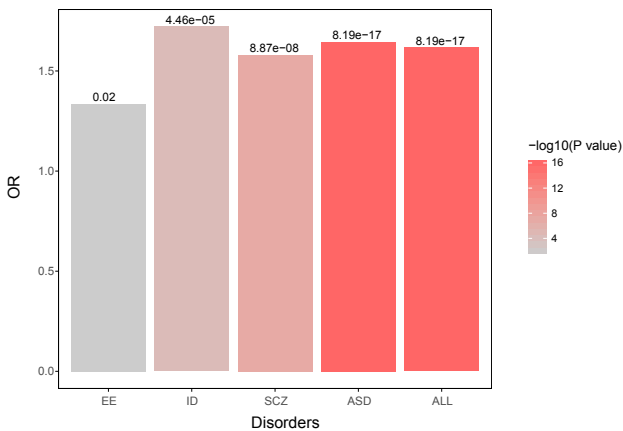

C

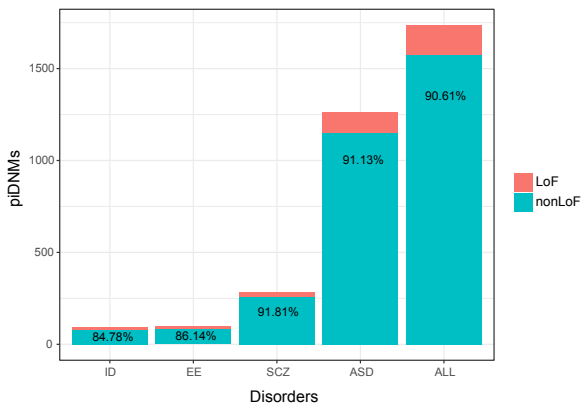

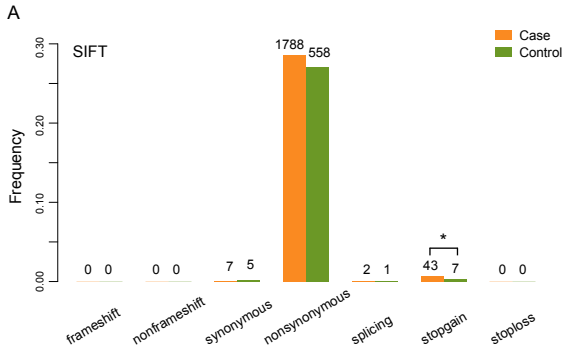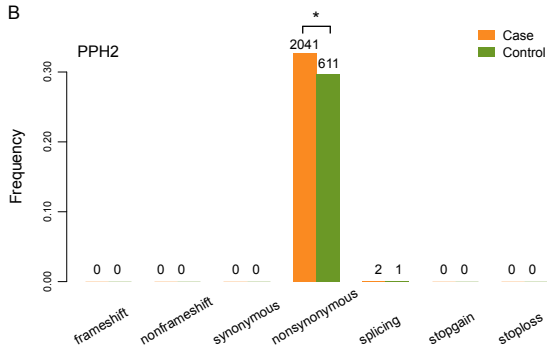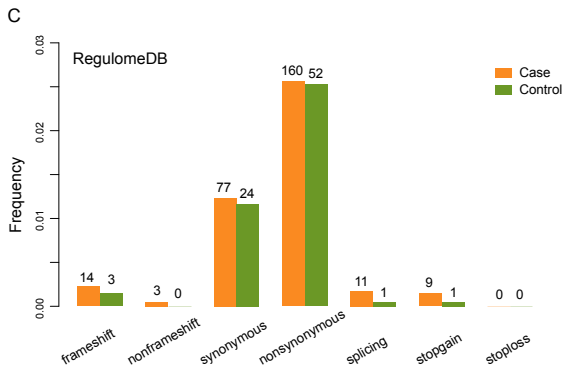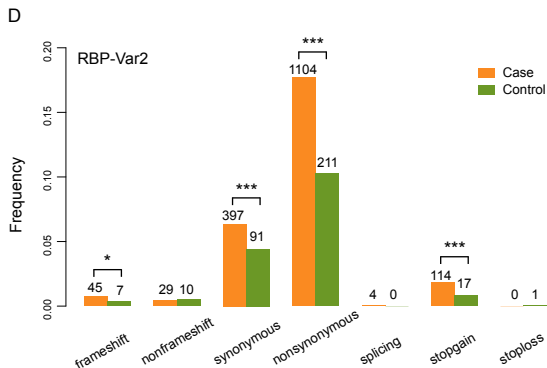



A

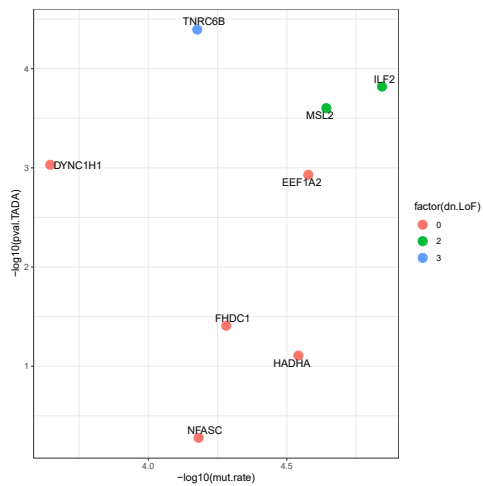

B

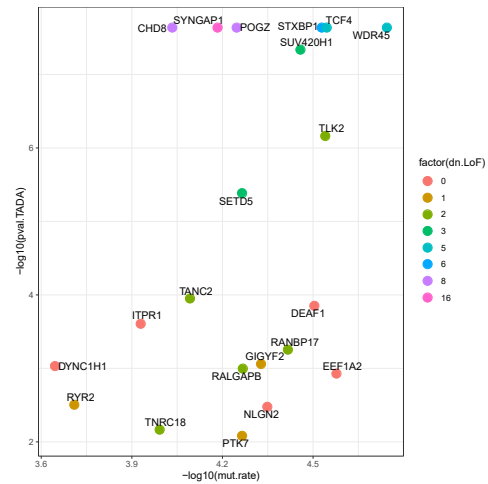

C

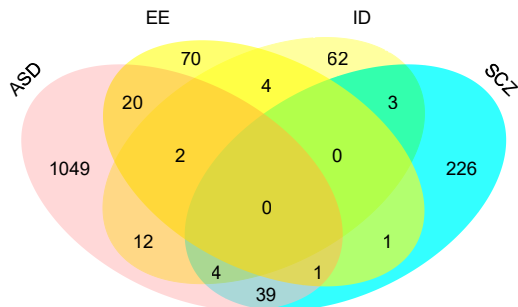

D

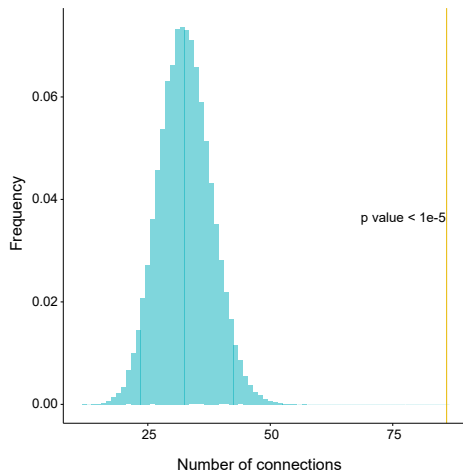

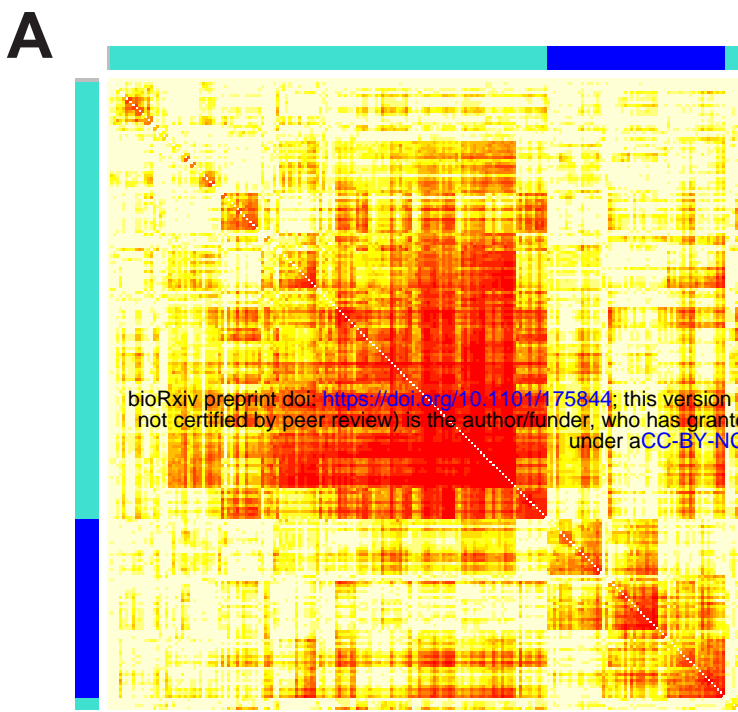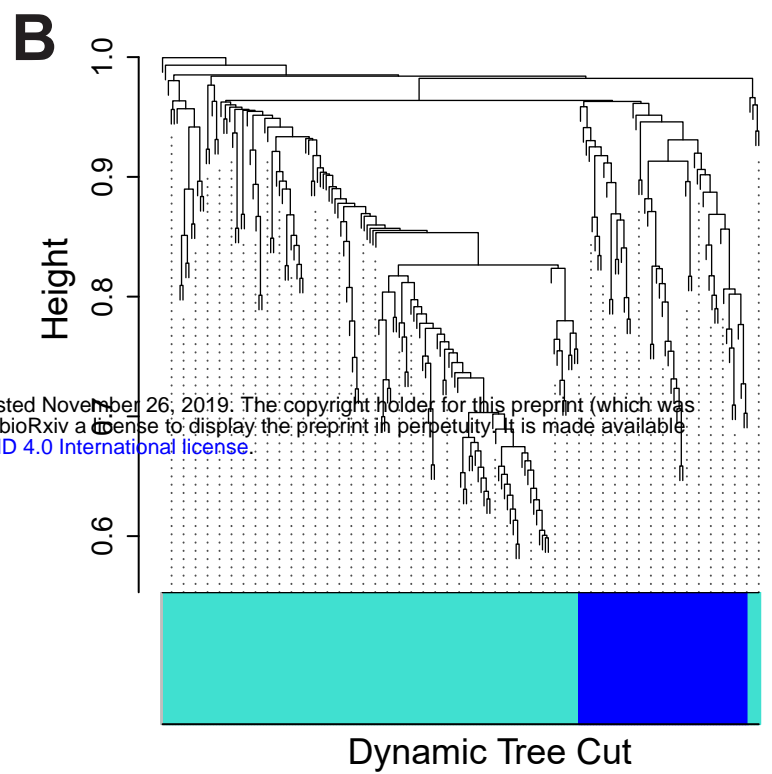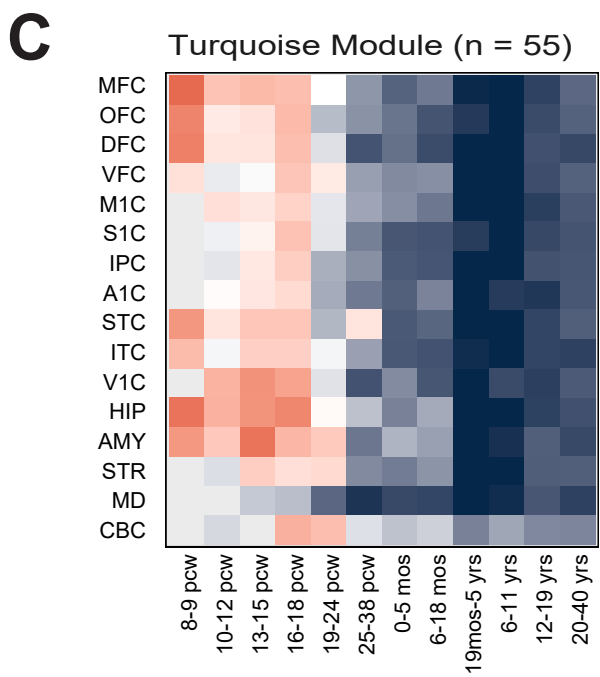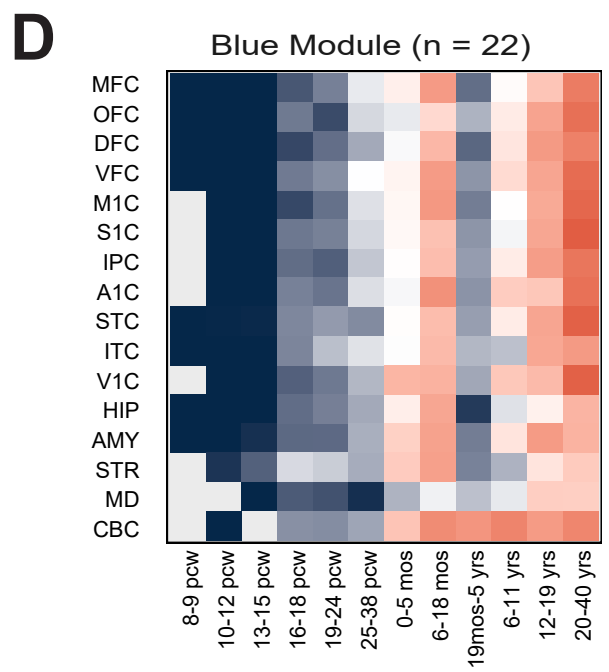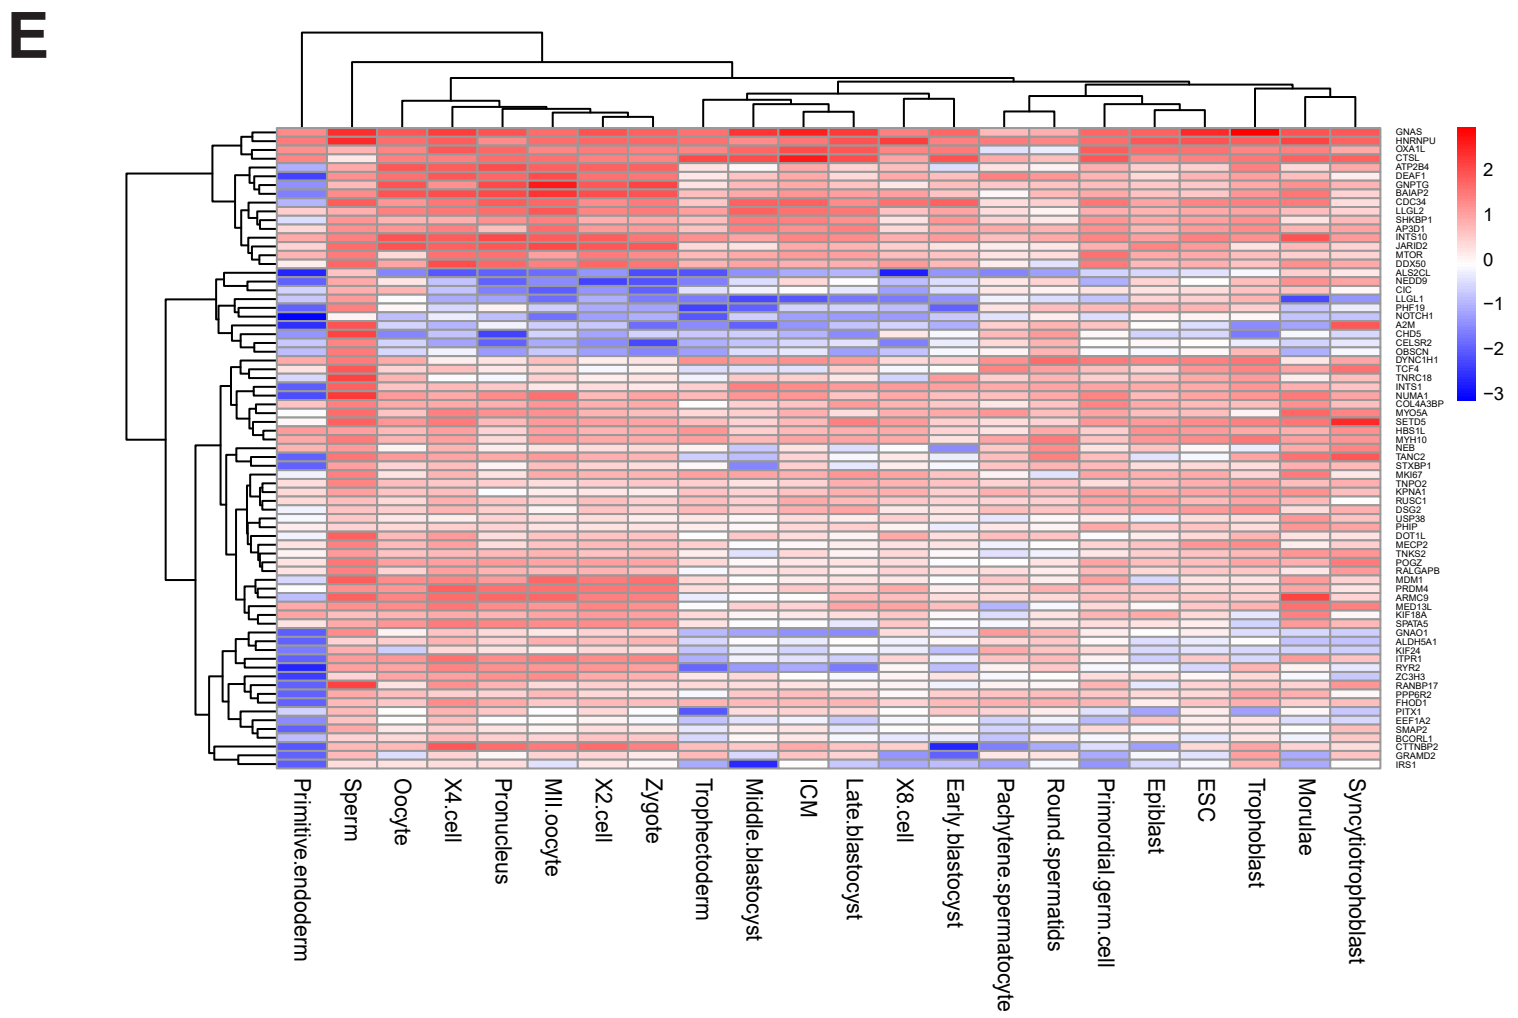

**A**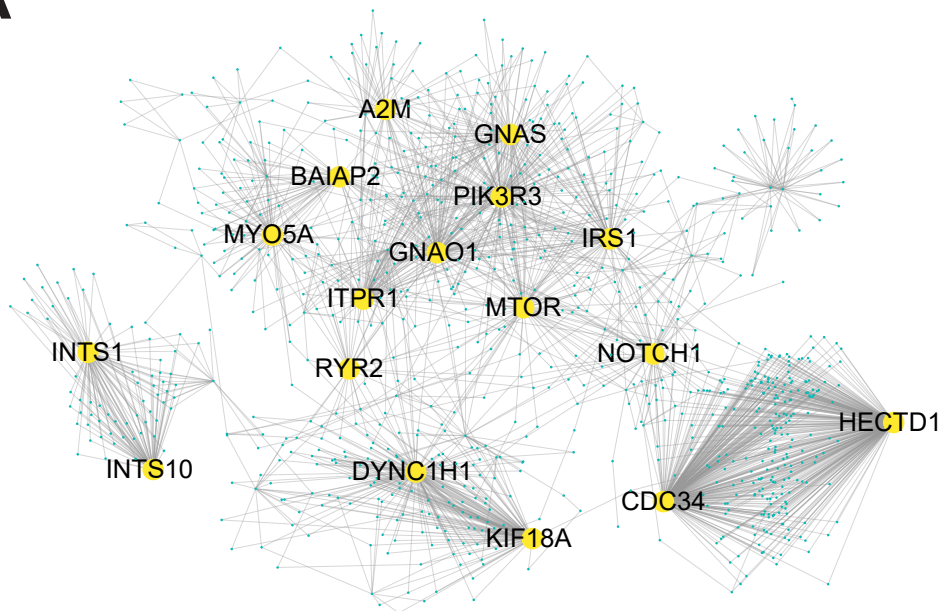**B**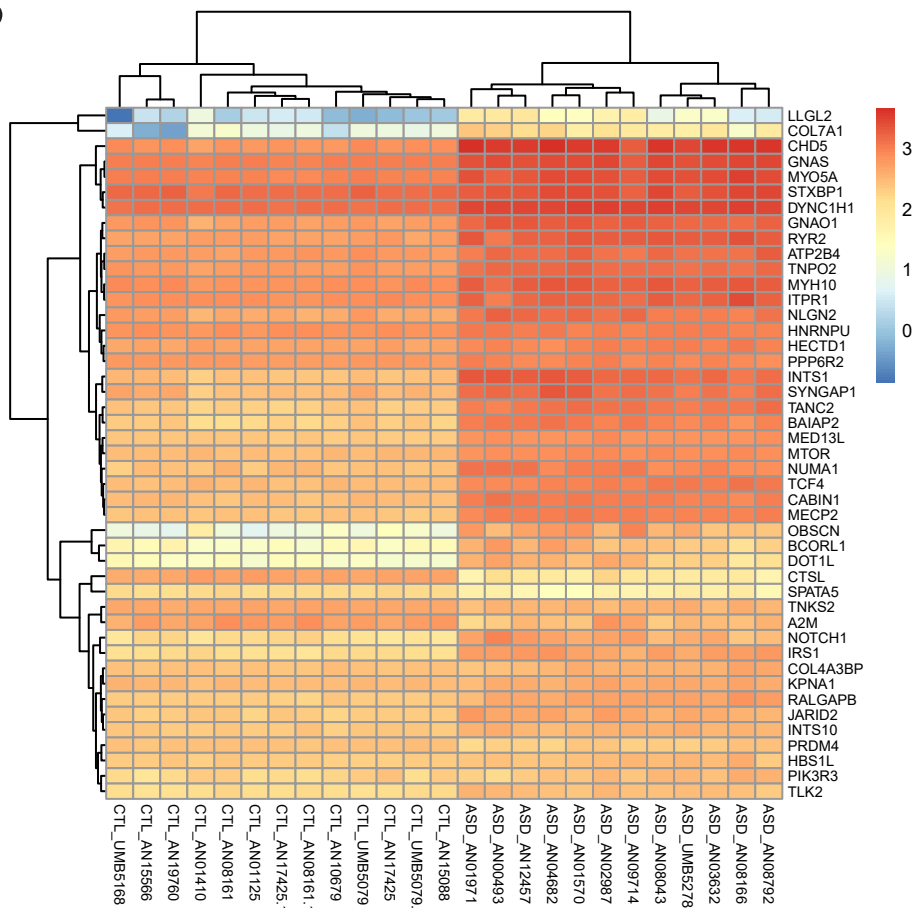

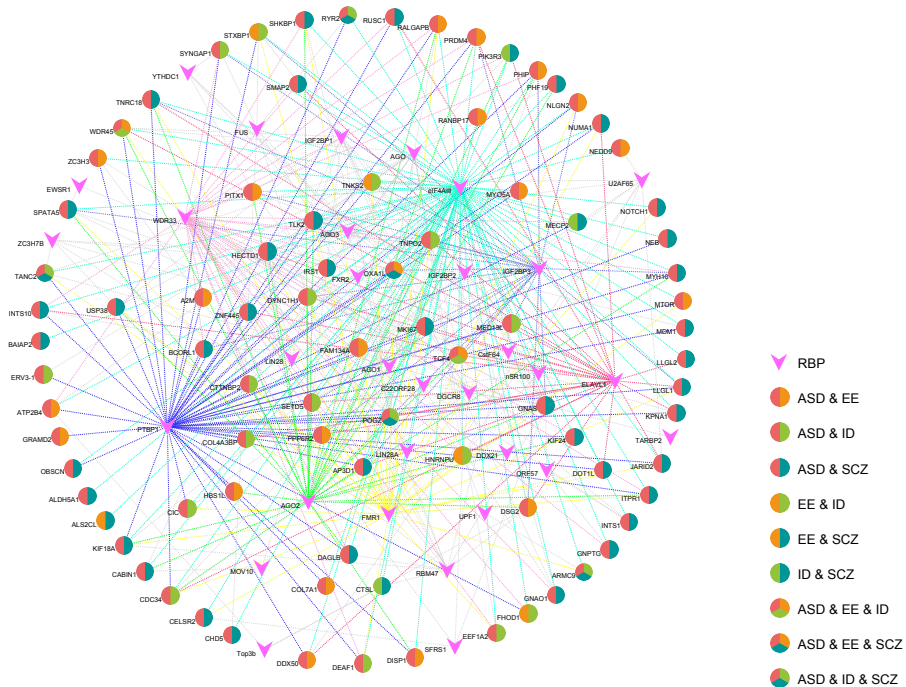

Source: https://www.biorxiv.org/content/10.1101/175844v5.full.pdf
